# Supplementary material for: Alkyl radicals from diacyl peroxides: metal-/base-/additive-free photocatalytic alkylation of N-heteroaromatics
Source: Royal Society of Chemistry journal article supplement (doi:10.1039/d3gc02545d), 2023-01-01
Supplement: d3gc02545d1.pdf [file d3gc02545d1.pdf]

# Supporting Information

## Alkyl radicals from diacyl peroxides: Metal-/base-/additive-free photocatalytic alkylation of *N*-heteroaromatics

Fukun Cheng,<sup>ab</sup> Lulu Fan,<sup>\*b</sup> Qiyun Lv,<sup>ac</sup> Xiaolan Chen<sup>\*a</sup>, Bing Yu<sup>\*a</sup>

<sup>a</sup> Green Catalysis Center, College of Chemistry, Zhengzhou University, Zhengzhou 450001, China. E-mail: bingyu@zzu.edu.cn

<sup>b</sup> College of Chemistry and Chemical Engineering, Henan University of Technology, Zhengzhou 450001, China.

<sup>c</sup> National Engineering Research Center of Low-Carbon Processing and Utilization of Forest Biomass, Nanjing Forestry University, Nanjing 210037, China.

### Table of Contents

|                                                                                |    |
|--------------------------------------------------------------------------------|----|
| 1. General Information.....                                                    | 2  |
| 1.1 Materials and instruments.....                                             | 2  |
| 1.2 The spectrum of our lamp and the visible-light irradiation instrument..... | 2  |
| 1.3 General procedure for the synthesis of azauracil substrates.....           | 3  |
| 1.4 General procedure for the synthesis of quinoxalinone substrates.....       | 3  |
| 1.5 General procedure for the synthesis of alkyl diacyl peroxides.....         | 4  |
| 2. Experimental procedures.....                                                | 4  |
| 2.1 General experimental procedures for the desired product.....               | 4  |
| 2.2 Sensitivity assessment of reaction.....                                    | 5  |
| 2.3 Gram-scale synthesis.....                                                  | 6  |
| 2.4 Irradiation with natural sunlight.....                                     | 6  |
| 2.5 Procedure for emission quenching experiments.....                          | 7  |
| 2.6 Procedure for cyclic voltammogram experiments.....                         | 8  |
| 2.7 Procedure for the fluorescence emission experiments.....                   | 8  |
| 2.8 Control experiments.....                                                   | 9  |
| 2.9. HRMS spectra of alkyl acid.....                                           | 10 |
| 2.11 Ineffective transformations.....                                          | 10 |
| 3. Characterization Data for Products.....                                     | 11 |
| 4. NMR Copies of Products.....                                                 | 38 |

# 1. General Information

## 1.1 Materials and instruments

All reagents were purchased from commercial suppliers and were used directly without further purification unless otherwise stated. TLC was performed on silica gel plates (F254, 200-300 mesh) using UV light (254/366 nm) for detection. Products were purified by column chromatography, which was carried out on 200-300 mesh of silica gel purchased from Qing Dao Hai Yang Chemical Industry Co. All the  $^1\text{H}$ ,  $^{13}\text{C}$ , and  $^{19}\text{F}$  NMR spectra were recorded on Bruker Avance 400 MHz operating at 400 MHz, 101 MHz, and 376 MHz, respectively. Proton chemical shifts  $\delta$  were given in ppm using tetramethylsilane as an internal standard. All NMR spectra were recorded in  $\text{CDCl}_3$  at room temperature ( $20 \pm 3^\circ\text{C}$ ). High-resolution mass spectra (HRMS) were taken with a 3000-mass spectrometer, using Waters Q-ToF MS/MS system with the ESI technique. Emission intensities were recorded using an F-4600 FL spectrophotometer. Cyclic voltammetry was performed on the CHI-660E electrochemical workstation (Shanghai Chenhua Instrument Co., Ltd., China).

## 1.2 The spectrum of our lamp and the visible-light irradiation instrument

The photochemical reaction was carried out under visible light irradiation by a blue LED at  $25^\circ\text{C}$ . RLH-18 8-position Photo Reaction System manufactured by Beijing Roger Tech Ltd. was used in this system. Eight 10 W blue LEDs were equipped in this Photo reactor. The blue LED's energy peak wavelength is 460 nm, peak width at half-height is 18.4 nm, irradiance@10 W is  $237.57 \text{ mW/cm}^2$ . The reaction vessel is borosilicate glass test tube and the distance between it and the lamp is 15 mm, no filter is applied.

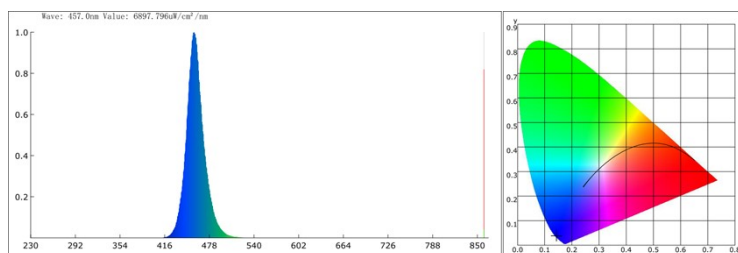

**Figure S1.** The spectrum of our lamp (blue LED)

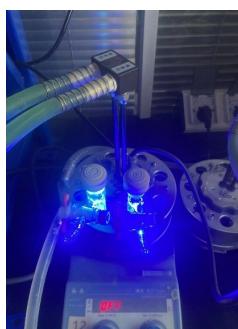

**Figure S2.** The visible-light irradiation instrument

### 1.3 General procedure for the synthesis of azaauracil substrates<sup>1</sup>

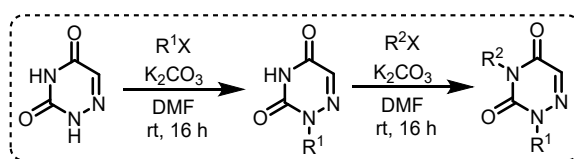

**Scheme S1.** General experimental procedures for azaauracil substrates

Alkyl halides (3.6 mmol, 0.9 equiv.) were added dropwise to a stirring solution of 6-azaauracil (4.0 mmol, 1.0 equiv.), K<sub>2</sub>CO<sub>3</sub> (2.0 mmol, 0.5 equiv.) in DMF (40 mL). The reaction mixture was allowed to stir at room temperature for 16 h. Then, the mixture was quenched with saturated Na<sub>2</sub>CO<sub>3</sub> solution and extracted with DCM three times. The organic layers were combined, dried over anhydrous Na<sub>2</sub>SO<sub>4</sub>, and concentrated under reduced pressure. The crude products were purified through silica gel column chromatography using petroleum ether/ethyl acetate as eluent to give to afford the corresponding *N*-1-alkyl-6-azaauracils.

Alkyl halides (2.0 mmol, 1.0 equiv.) were added dropwise to a stirring solution of *N*-1-alkyl-6-azaauracils (2.0 mmol, 1.0 equiv.), K<sub>2</sub>CO<sub>3</sub> (1.0 mmol, 0.5 equiv.) in DMF (20 mL). The reaction mixture was allowed to stir at room temperature for 16 h. Then, the mixture was quenched with saturated Na<sub>2</sub>CO<sub>3</sub> solution and extracted with DCM three times. The organic layers were combined, dried over anhydrous Na<sub>2</sub>SO<sub>4</sub>, and concentrated under reduced pressure. The crude products were purified through silica gel column chromatography using petroleum ether/ethyl acetate as eluent to give to afford the corresponding *N*-1, *N*-3-dialkyl-6-azaauracils.

### 1.4 General procedure for the synthesis of quinoxalinone substrates<sup>2</sup>

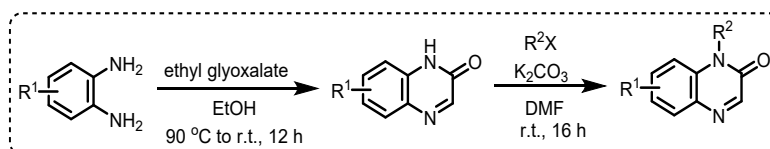

**Scheme S2.** General experimental procedures for quinoxalinone substrates

Ethyl glyoxalate (1.1 equiv.) was added dropwise to a stirring solution of *o*-arylenediamine (1 equiv.) in ethanol. The reaction mixture was allowed to stir at room temperature for 1 h. The precipitated solid was filtered and washed with ethanol, then dried to give quinoxalinone.

To a suspension of quinoxalinone (1 equiv.) in DMF was added potassium carbonate (1.2 equiv.) and the corresponding halogenoalkane (1.6 equiv.). The mixture was stirred at room temperature overnight. Ethyl acetate and water were added. The aqueous layer was extracted twice with EtOAc. The combined organic layers were washed with a saturated solution of NaCl, dried over MgSO<sub>4</sub>, filtered, and evaporated under reduced pressure. The residue is purified by flash chromatography over silica gel to afford the desired product *N*-alkyl quinoxalinone.

## 1.5 General procedure for the synthesis of alkyl diacyl peroxides<sup>3</sup>

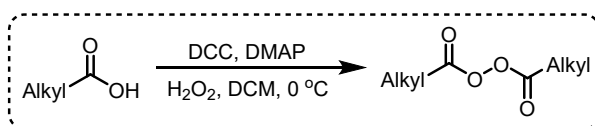

**Scheme S3.** General experimental procedures for alkyl diacyl peroxides substrates

A solution of DMAP (0.1 equiv.), 30% hydrogen peroxide (1.5 equiv.), and alkyl acid (6 mmol) in DCM was cooled to -10 °C for about 15 min, then DCC dissolved in DCM was added. After stirring for 2 h at -10 °C, the solution was filtered through a short pad of silica gel. The combined solution was concentrated on a rotary evaporator under vacuum at 10 – 15 °C, and purified using DCM as the eluent to afford the diacyl peroxide.

## 2. Experimental procedures

### 2.1 General experimental procedures for the desired product

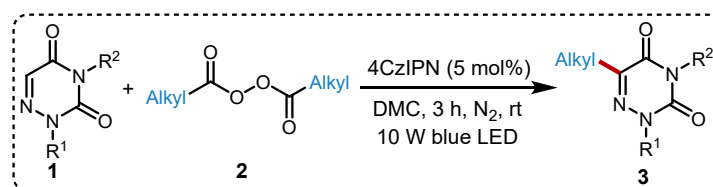

**Scheme S4.** General experimental procedures for alkylated azauracils

The mixture of azauracil 1 (0.2 mmol), alkyl diacyl peroxides 2 (0.2 mmol), 4CzIPN (5 mol %) and DMC (2.0 mL) were sequentially added in a 25 mL reaction vessel. Then the reaction vessel was irradiated with 10 W blue LED (460 nm) at room temperature under N<sub>2</sub> atmosphere for 3 h. After the reaction, the solvent was evaporated under vacuum. The residue was purified by chromatography on silica gel using petroleum ether/ethyl acetate as eluent to afford the desired product 3.

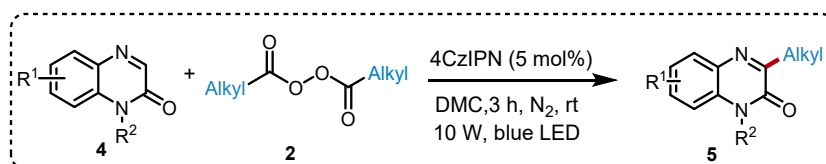

**Scheme S5.** General experimental procedures for alkylated quinoxalinones

The mixture of quinoxalinone 4 (0.2 mmol), alkyl diacyl peroxides 2 (0.2 mmol), 4CzIPN (5 mol %) and DMC (2.0 mL) was sequentially added in a 25 mL reaction vessel. Then the reaction vessel was irradiated with 10 W blue LED (460 nm) at room temperature under N<sub>2</sub> atmosphere for 3 h. After the reaction, the solvent was evaporated under vacuum. The residue was purified by chromatography on silica gel using petroleum ether/ethyl acetate as eluent to afford the desired product 5.

## 2.2 Sensitivity assessment of reaction

**Table S1.** Sensitivity assessment of the reaction of **1a** with **2a**

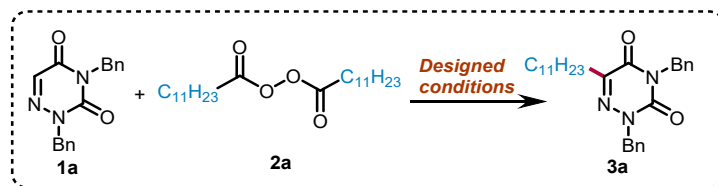

| Parameter                    | Variation             | Description                                                             | Yield <sup>b</sup>                      |     |
|------------------------------|-----------------------|-------------------------------------------------------------------------|-----------------------------------------|-----|
| Concentration ( <i>c</i> )   | High <i>c</i>         | <i>c</i> + 10% <i>c</i>                                                 | 0.9 ml DMC                              | 82% |
|                              | Low <i>c</i>          | <i>c</i> - 10% <i>c</i>                                                 | 1.1 mL DMC                              | 80% |
| H <sub>2</sub> O level       | High H <sub>2</sub> O | + H <sub>2</sub> O; V <sub>H<sub>2</sub>O</sub> =<br>1%V <sub>rxn</sub> | 10 μL H <sub>2</sub> O in 1.0 mL<br>DMC | 81% |
| O <sub>2</sub> level         | High O <sub>2</sub>   | Air                                                                     | Air instead of N <sub>2</sub>           | 40% |
|                              | Low O <sub>2</sub>    | N <sub>2</sub>                                                          | N <sub>2</sub>                          | 80% |
| Temperature ( <i>T</i> )     | High <i>T</i>         | <i>T</i> + 10 °C                                                        | 35 °C                                   | 83% |
|                              | Low <i>T</i>          | <i>T</i> - 10 °C                                                        | 15 °C                                   | 80% |
| Light intensity ( <i>W</i> ) | Low <i>W</i>          | <i>W</i> /16                                                            | 0.6 W                                   | 0%  |
| Scale                        | Big scale             | n:30                                                                    | 3 mmol of <b>1a</b>                     | 85% |

<sup>a</sup>Standard conditions: 2,4-dibenzyl-1,2,4-triazine-3,5(2*H*,4*H*)-dione (0.1 mmol), LPO (0.1 mmol), 4CzIPN (5 mol%) and DMC (1.0 mL), 460 nm blue LED (10 W), under N<sub>2</sub> for 3 h, room temperature. <sup>b</sup>The average yield of three parallel reactions.

**Table S2.** Sensitivity assessment of the reaction of **4a** with **2a**

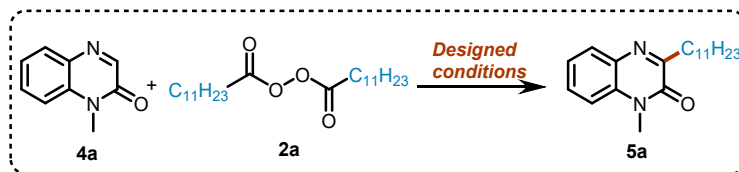

| Parameter                    | Variation             | Description                                                             | Yield <sup>b</sup>                      |     |
|------------------------------|-----------------------|-------------------------------------------------------------------------|-----------------------------------------|-----|
| Concentration ( <i>c</i> )   | High <i>c</i>         | <i>c</i> + 10% <i>c</i>                                                 | 0.9 mL DMC                              | 79% |
|                              | Low <i>c</i>          | <i>c</i> - 10% <i>c</i>                                                 | 1.1 mL DMC                              | 77% |
| H <sub>2</sub> O level       | High H <sub>2</sub> O | + H <sub>2</sub> O; V <sub>H<sub>2</sub>O</sub> =<br>1%V <sub>rxn</sub> | 10 μL H <sub>2</sub> O in 1.0 mL<br>DMC | 74% |
| O <sub>2</sub> level         | High O <sub>2</sub>   | Air                                                                     | Air instead of N <sub>2</sub>           | 0%  |
|                              | Low O <sub>2</sub>    | N <sub>2</sub>                                                          | N <sub>2</sub>                          | 74% |
| Temperature ( <i>T</i> )     | High <i>T</i>         | <i>T</i> + 10 °C                                                        | 35 °C                                   | 74% |
|                              | Low <i>T</i>          | <i>T</i> - 10 °C                                                        | 15 °C                                   | 73% |
| Light intensity ( <i>W</i> ) | Low <i>W</i>          | <i>W</i> /16                                                            | 0.6 W                                   | 0%  |
| Scale                        | Big scale             | n:30                                                                    | 3 mmol of <b>4a</b>                     | 72% |

<sup>a</sup>Standard conditions: quinoxalinone (0.1 mmol), LPO (0.1 mmol), 4CzIPN (5 mol %) and DMC (1.0 mL), 460 nm blue LED (10 W), under N<sub>2</sub> for 3 h, room temperature. <sup>b</sup>The average yield of three parallel reactions.

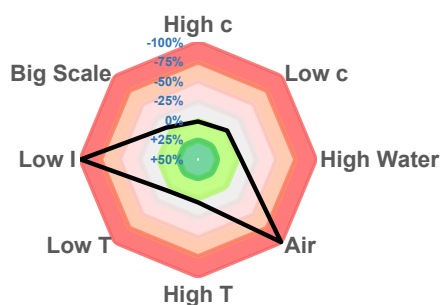

**Figure S3.** Sensitivity assessment of the reaction of **2a** with **4a**.

### 2.3 Gram-scale synthesis

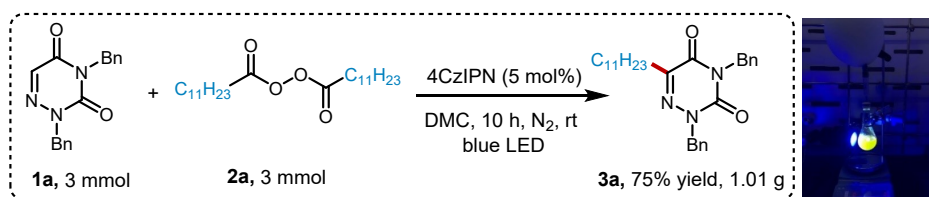

**Scheme S6.** Gram-scale synthesis of **3a**

The mixture of 2,4-dibenzyl-1,2,4-triazine-3,5(2H,4H)-dione **1a** (3 mmol), LPO **2a** (3 mmol), 4CzIPN (5 mol%) and DMC (30 mL) were sequentially added in a 100 mL round bottom flask. Then the reaction vessel was irradiated with 10 W blue LED (465 nm) at room temperature under N<sub>2</sub> atmosphere for 10 h. After the reaction, the solvent was evaporated under vacuum. The residue was purified by chromatography on silica gel using petroleum ether/ethyl acetate as eluent to afford the desired product **3a** (1.01 g, 75%).

### 2.4 Irradiation with natural sunlight

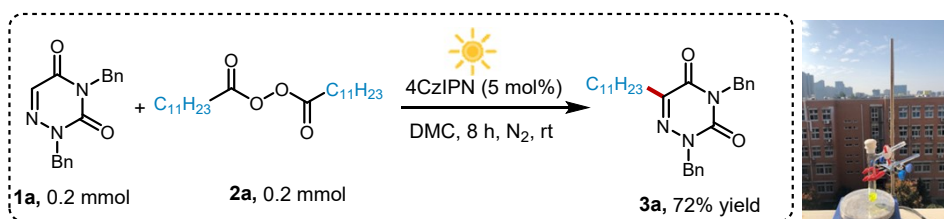

**Scheme S7.** Synthesis of **3a** under natural sunlight

The mixture of 2,4-dibenzyl-1,2,4-triazine-3,5(2H,4H)-dione **1a** (0.2 mmol), LPO **2a** (0.2 mmol), 4CzIPN (5 mol%) and DMC (2.0 mL) were sequentially added in a 25 mL reaction vessel. Then the reaction system was carried out under sunlight for 8 h (from 9:00 to 17:00. 2022/09/28 in Zhengzhou, Henan province, China. Temperature: 20 °C – 25 °C). After the reaction, the solvent was evaporated under vacuum. The residue was purified by chromatography on silica gel using petroleum ether/ethyl acetate as eluent to afford the desired product **3a** (72%).

## 2.5 Procedure for emission quenching experiments

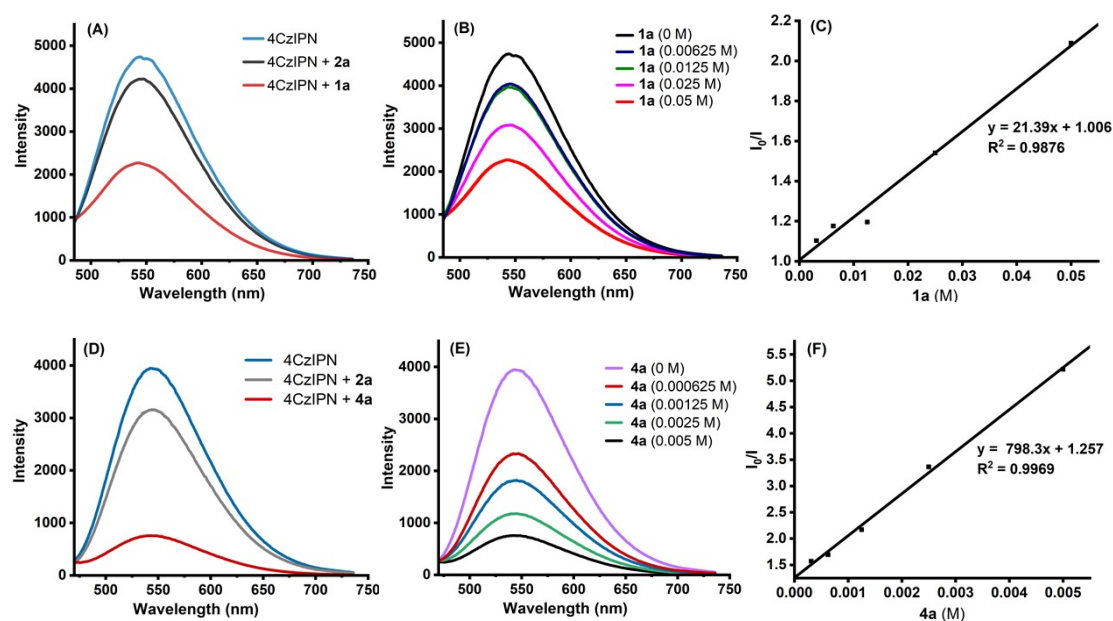

Figure S4. Luminescence quenching study

Emission intensities were recorded using an F-4600 FL Spectrophotometer. First, the emission intensity of 4CzIPN solutions was observed at 550 nm. The solutions were irradiated at 378 nm (Maximum absorption wavelength of 4CzIPN) and fluorescence was measured from 400 nm to 700 nm. In a typical experiment, the emission spectrum of a  $5 \times 10^{-5}$  M solution of 4CzIPN with different concentration of **1a**, **4a** in degassed anhydrous  $\text{CH}_3\text{CN}$  in 10 mm path length quartz cuvette was collected: A) the emission spectra of  $5 \times 10^{-5}$  M solutions of 4CzIPN with reactants (**1a**, **2a**) in degassed anhydrous  $\text{CH}_3\text{CN}$ ; B) the emission spectra of a  $5 \times 10^{-5}$  M solution of 4CzIPN with various concentrations of **1a** in degassed anhydrous  $\text{CH}_3\text{CN}$ . C) the linear relationship between  $I_0/I$  and the increasing concentration of **1a** ( $I_0$  and  $I$  are the fluorescence intensities before and after the increasing the concentration of **1a**, respectively.). D) the emission spectra of  $5 \times 10^{-5}$  M solutions of 4CzIPN with reactants (**2a**, **4a**) in degassed anhydrous  $\text{CH}_3\text{CN}$ ; E) the emission spectra of a  $5 \times 10^{-5}$  M solution of 4CzIPN with various concentrations of **4a** in degassed anhydrous  $\text{CH}_3\text{CN}$ . F) the linear relationship between  $I_0/I$  and the increasing concentration of **4a** ( $I_0$  and  $I$  are the fluorescence intensities before and after the increasing the concentration of **4a**, respectively).

## 2.6 Procedure for cyclic voltammogram experiments

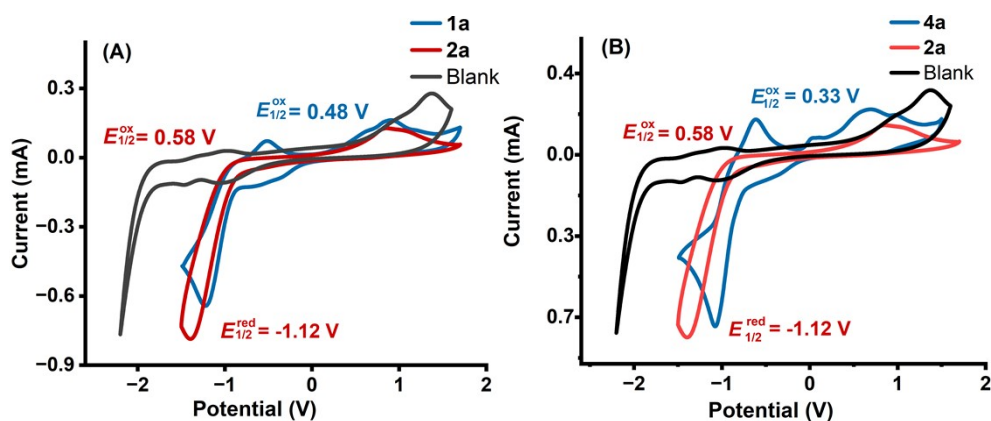

Figure S5. Cyclic voltammogram study

Cyclic voltammetry was performed on the CHI-660E electrochemical workstation (Shanghai Chenhua Instrument Co., Ltd., China). Cyclic voltammograms of 0.1 M tetrabutylammonium hexafluorophosphate (TBAH) and related compounds in  $\text{CH}_3\text{CN}$  using Pt working electrode, Pt wire, and silver chloride electrode (Ag/AgCl) as counter electrode and reference electrode at 100 mV/s scan rate. The relationship between  $E(\text{Ag}/\text{AgCl})$  and  $E(\text{SCE})$  is converted according to the following formula:  $E(\text{Ag}/\text{AgCl}) = E(\text{SCE}) + 0.042$  V.<sup>4</sup>

## 2.7 Procedure for the fluorescence emission experiments

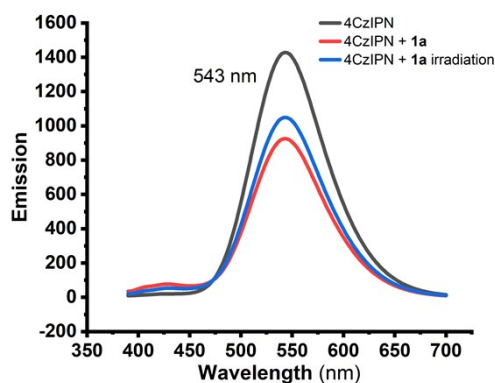

Figure S6. the fluorescence emission experiments

According to the protocol of Section 2.6, the fluorescence emission experiments of the solution of 4CzIPN ( $5 \times 10^{-5}$  M) in anhydrous  $\text{CH}_3\text{CN}$  (Figure S6, grey line), the solution of **1a** ( $5 \times 10^{-2}$  M) and 4CzIPN ( $5 \times 10^{-5}$  M) in anhydrous  $\text{CH}_3\text{CN}$  (Figure S6, red line), and the solution of **1a** ( $5 \times 10^{-2}$  M) and 4CzIPN ( $5 \times 10^{-5}$  M) in anhydrous  $\text{CH}_3\text{CN}$  irradiation with 460 nm blue



LED for 10 min before the test (Figure S6, blue line) were conducted. No hypsochromic shift is observed, thus ruling out the consecutive photoinduced electron transfer (ConPET) mechanism.

## 2.8 Control experiments

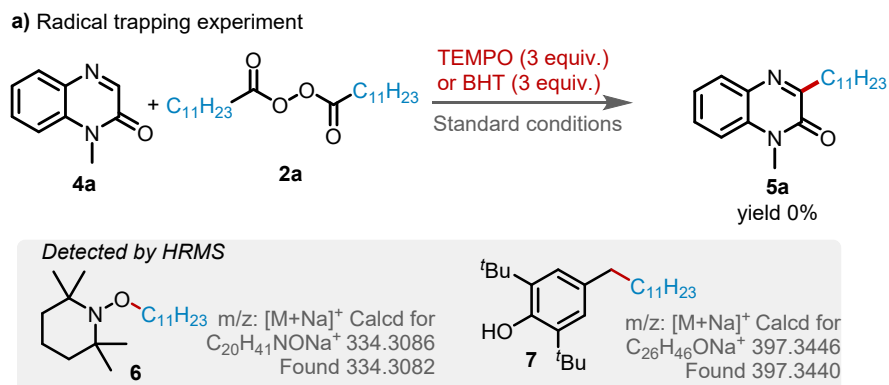

Scheme S8. Control experiments

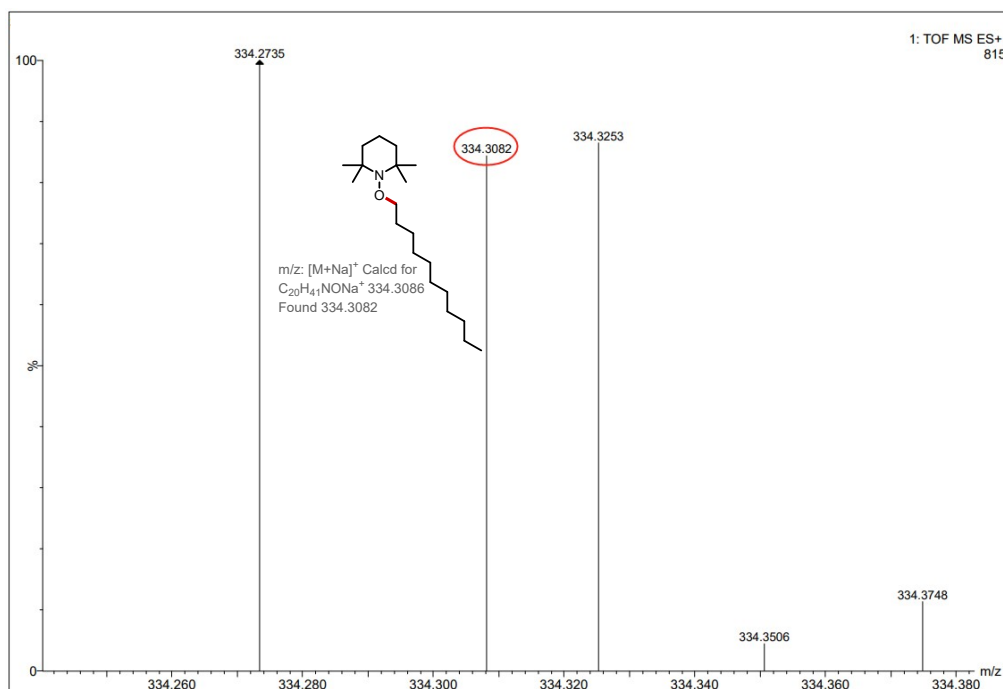

Figure S7. The HRMS analysis of compound 6

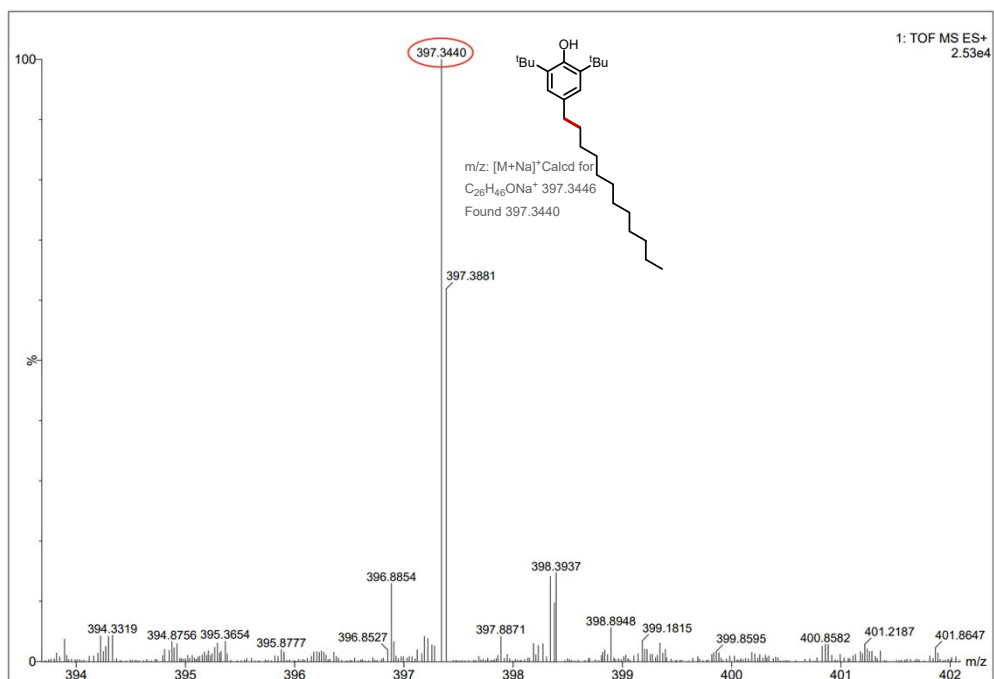

Figure S8. The HRMS analysis of compound 7

## 2.9. HRMS spectra of alkyl acid

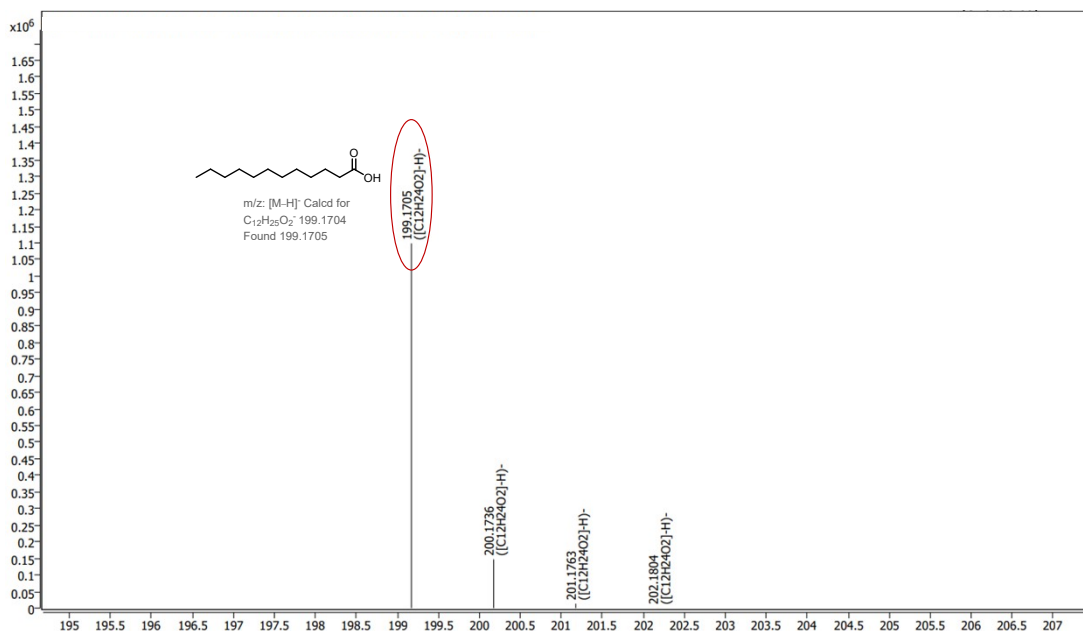

Figure S9. The HRMS analysis of alkyl acid

## 2.11 Ineffective transformations

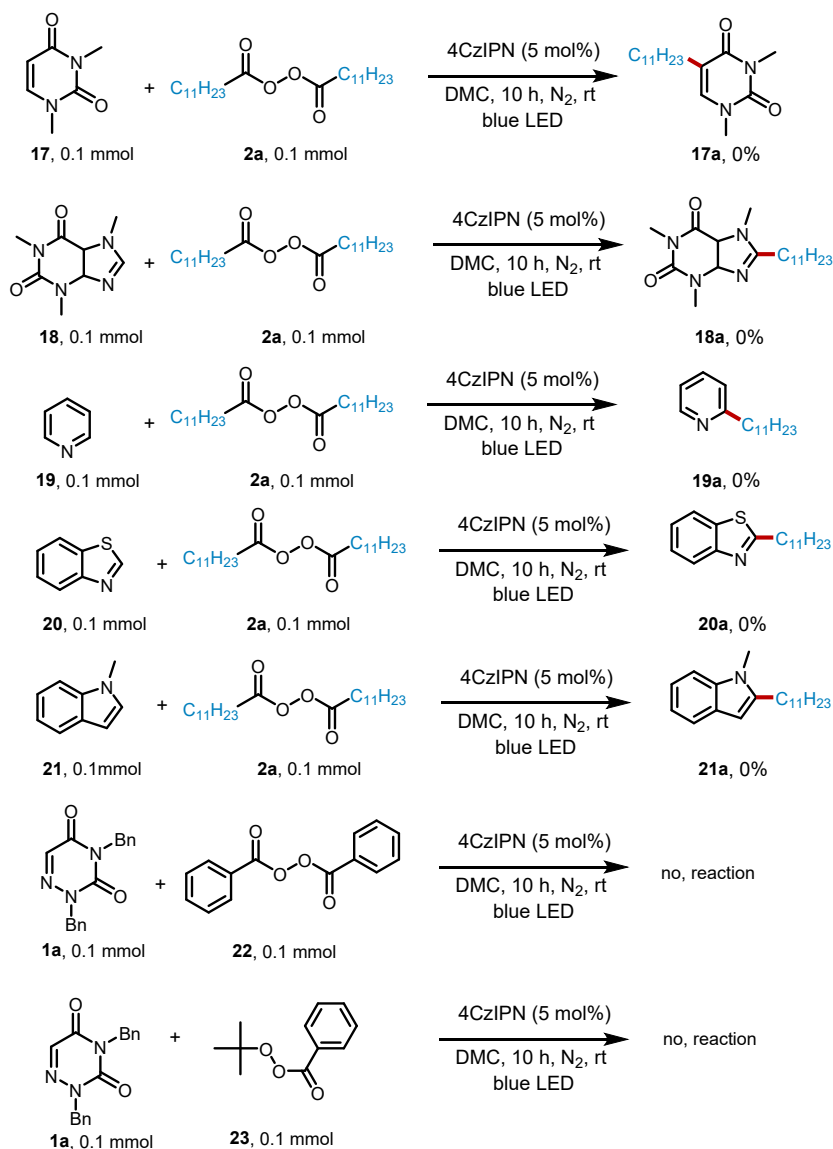

Scheme S9. Ineffective transformations

### 3. Characterization Data for Products

#### *4-benzyl-2-isopropyl-1,2,4-triazine-3,5(2H,4H)-dione (1h)*

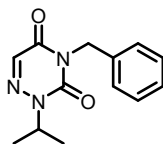

Purification by flash column chromatography (PE:EA, 10:1 v/v). White solid (500.7 mg, 83% yield) mp 80.6 – 82.6 °C.  $^1H$  NMR (400 MHz, Chloroform-*d*)  $\delta$  7.55 – 7.48 (m, 2H), 7.46 (s, 1H), 7.39 – 7.26 (m, 3H), 5.11 (s, 2H), 4.99-4.92 (m, 1H), 1.33 (d,  $J = 6.7$  Hz, 6H).  $^{13}C$  NMR (101 MHz, Chloroform-*d*)  $\delta$  155.7, 148.4, 135.6, 134.0, 129.5, 128.6, 128.1, 50.9, 43.9, 20.6. HRMS (ESI-TOF)  $m/z$ :  $[M + Na]^+$  Calcd for  $C_{13}H_{15}N_3O_2Na$ , 268.1056; Found: 268.1058.

**2-methyl-1,2,4-triazine-3,5(2H,4H)-dione (1j)**

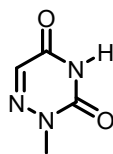

Purification by flash column chromatography (PE:EA, 8:1 v/v). White solid (1200.7 mg, 75% yield). mp 59.5 – 61.5 °C. <sup>1</sup>H NMR (400 MHz, Chloroform-*d*) δ 10.33 (s, 1H), 7.43 (s, 1H), 3.35 (s, 3H). <sup>13</sup>C NMR (101 MHz, Chloroform-*d*) δ 156.2, 149.8, 135.2, 26.4. HRMS (ESI-TOF) *m/z*: [M + H]<sup>+</sup> Calcd for C<sub>4</sub>H<sub>5</sub>N<sub>3</sub>O<sub>2</sub>H, 128.0455; Found: 128.0459.

**2-(4-(4-methylbenzyl)-3,5-dioxo-4,5-dihydro-1,2,4-triazin-2(3H)-yl)ethyl 2-(4-(2,2-dichlorocyclopropyl)phenoxy)-2-methylpropanoate (1u)**

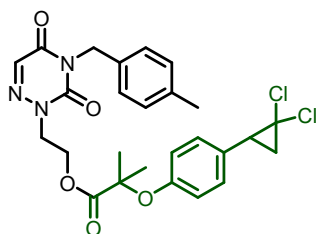

Purification by flash column chromatography (PE:EA, 20:1 v/v). Colorless oil (500.2 mg, 90% yield). <sup>1</sup>H NMR (400 MHz, Chloroform-*d*) δ 7.38 (d, *J* = 8.1 Hz, 2H), 7.23 (s, 1H), 7.14 (d, *J* = 7.8 Hz, 2H), 7.06 (d, *J* = 8.6 Hz, 2H), 6.80 – 6.71 (m, 2H), 5.01 (s, 2H), 4.49 (dd, *J* = 5.7, 4.7 Hz, 2H), 4.23 (dd, *J* = 5.9, 4.5 Hz, 2H), 2.83 (dd, *J* = 10.7, 8.3 Hz, 1H), 2.34 (s, 3H), 1.96 (dd, *J* = 10.7, 7.4 Hz, 1H), 1.78 (dd, *J* = 8.3, 7.4 Hz, 1H), 1.55 (s, 6H). <sup>13</sup>C NMR (101 MHz, Chloroform-*d*) δ 174.0, 155.6, 154.8, 148.6, 138.0, 134.5, 132.3, 129.6, 129.4, 129.3, 128.3, 118.5, 62.1, 60.9, 50.4, 43.7, 34.8, 25.9, 25.3, 25.2, 21.2. HRMS (ESI-TOF) *m/z*: [M + Na]<sup>+</sup> Calcd for C<sub>26</sub>H<sub>27</sub>N<sub>3</sub>O<sub>5</sub>NaCl<sub>2</sub>, 554.1220; Found: 554.1220.

**2-(4-(4-methylbenzyl)-3,5-dioxo-4,5-dihydro-1,2,4-triazin-2(3H)-yl)ethyl 2-(4-chlorophenoxy)-2-methylpropanoate (1v)**

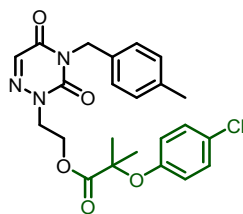

Purification by flash column chromatography (PE:EA, 30:1 v/v). Colorless oil (350.1 mg, 77%

yield). <sup>1</sup>H NMR (400 MHz, Chloroform-*d*) δ 7.37 (d, *J* = 8.1 Hz, 2H), 7.29 (s, 1H), 7.19 – 7.08 (m, 4H), 6.77 – 6.69 (m, 2H), 5.01 (s, 2H), 4.48 (dd, *J* = 5.7, 4.5 Hz, 2H), 4.23 (dd, *J* = 5.7, 4.5 Hz, 2H), 2.33 (s, 3H), 1.53 (s, 6H). <sup>13</sup>C NMR (101 MHz, Chloroform-*d*) δ 173.7, 155.6, 153.9, 148.6, 137.9, 134.5, 132.4, 129.4, 129.3, 129.1, 127.3, 120.3, 62.2, 50.4, 43.7, 25.2, 21.2. HRMS (ESI-TOF) *m/z*: [M + Na]<sup>+</sup> Calcd for C<sub>23</sub>H<sub>24</sub>N<sub>3</sub>O<sub>5</sub>NaCl, 480.1297; Found: 480.1296.

**2-(3-(4-methylbenzyl)-2,4-dioxo-3,4-dihydropyrimidin-1(2H)-yl)ethyl 2-(2-fluoro-[1,1'-biphenyl]-4-yl)propanoate (1w)**

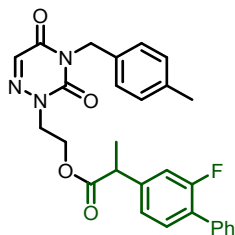

Purification by flash column chromatography (PE:EA, 20:1 v/v). Colorless oil (500.3 mg, 90% yield). <sup>1</sup>H NMR (400 MHz, Chloroform-*d*) δ 7.62 – 7.54 (m, 2H), 7.48 (t, *J* = 7.6 Hz, 2H), 7.40 (dd, *J* = 11.8, 7.8 Hz, 4H), 7.32 (s, 1H), 7.16 (d, *J* = 7.8 Hz, 2H), 7.14 – 7.03 (m, 2H), 5.06 (d, *J* = 2.2 Hz, 2H), 4.58 – 4.37 (m, 2H), 4.32-4.15 (m, 2H), 3.68 (q, *J* = 7.2 Hz, 1H), 2.35 (s, 3H), 1.51 (d, *J* = 7.2 Hz, 3H). <sup>13</sup>C NMR (101 MHz, Chloroform-*d*) δ 173.7, 159.7 (d, *J* = 248.5 Hz), 155.7, 148.8, 141.4 (d, *J* = 7.5 Hz), 138.0, 135.4, 134.5, 132.5, 130.8 (d, *J* = 4.0 Hz), 129.4, 129.3, 129.0 (d, *J* = 2.9 Hz), 128.5, 128.0, 127.8, 123.6 (d, *J* = 3.4 Hz), 115.4 (d, *J* = 23.7 Hz), 61.6, 50.6, 44.9, 43.7, 21.2, 18.2. <sup>19</sup>F NMR (376 MHz, Chloroform-*d*) δ -117.41. HRMS (ESI-TOF) *m/z*: [M + Na]<sup>+</sup> Calcd for C<sub>28</sub>H<sub>26</sub>N<sub>3</sub>O<sub>4</sub>NaF, 510.1800; Found: 510.1805.

**2-(4-benzyl-3,5-dioxo-4,5-dihydro-1,2,4-triazin-2(3H)-yl)ethyl 2-acetoxybenzoate (1x)**

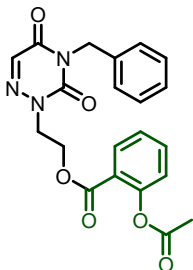

Purification by flash column chromatography (PE:EA, 10:1 v/v). Colorless oil (500.3 mg, 90% yield). <sup>1</sup>H NMR (400 MHz, Chloroform-*d*) δ 7.96 (dd, *J* = 7.9, 1.7 Hz, 1H), 7.58 (ddd, *J* = 8.1,

7.4, 1.7 Hz, 1H), 7.51 – 7.46 (m, 2H), 7.40 (s, 1H), 7.30 – 7.24 (m, 4H), 7.11 (dd,  $J = 8.1, 1.2$  Hz, 1H), 5.10 (s, 2H), 4.61 (dd,  $J = 5.8, 4.6$  Hz, 2H), 4.35 (dd,  $J = 5.7, 4.7$  Hz, 2H), 2.28 (s, 3H).  $^{13}\text{C}$  NMR (101 MHz, Chloroform-*d*)  $\delta$  169.6, 163.9, 155.8, 151.0, 148.9, 135.3, 134.7, 134.2, 131.8, 129.3, 128.6, 128.1, 126.1, 123.9, 122.5, 61.6, 50.7, 44.0, 20.9. HRMS (ESI-TOF)  $m/z$ :  $[\text{M} + \text{Na}]^+$  Calcd for  $\text{C}_{21}\text{H}_{19}\text{N}_3\text{O}_6\text{Na}$ , 432.1166; Found: 432.1169.

**2-(4-(4-methylbenzyl)-3,5-dioxo-4,5-dihydro-1,2,4-triazin-2(3H)-yl)ethyl 2-(4-(2,2-dichlorocyclopropyl)phenoxy)-2-methylpropanoate (1y)**

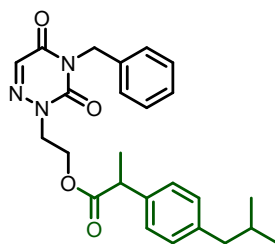

Purification by flash column chromatography (PE:EA, 20:1 v/v). Colorless oil (600.7 mg, 90% yield).  $^1\text{H}$  NMR (400 MHz, Chloroform-*d*)  $\delta$  7.50 (dd,  $J = 7.9, 1.7$  Hz, 2H), 7.40 – 7.29 (m, 3H), 7.23 (s, 1H), 7.17 – 7.10 (m, 2H), 7.10 – 7.02 (m, 2H), 5.07 (d,  $J = 1.0$  Hz, 2H), 4.47 – 4.35 (m, 2H), 4.25 – 4.09 (m, 2H), 3.62 (q,  $J = 7.2$  Hz, 1H), 2.47 (d,  $J = 7.2$  Hz, 2H), 1.88 – 1.78 (m, 1H), 1.45 (d,  $J = 7.2$  Hz, 3H), 0.93 (d,  $J = 6.7$  Hz, 6H).  $^{13}\text{C}$  NMR (101 MHz, Chloroform-*d*)  $\delta$  174.4, 155.7, 148.7, 140.7, 137.3, 135.4, 134.3, 129.4, 129.3, 128.6, 128.2, 127.2, 61.2, 50.6, 45.01, 44.95, 43.9, 30.2, 22.4, 18.3. HRMS (ESI-TOF)  $m/z$ :  $[\text{M} + \text{Na}]^+$  Calcd for  $\text{C}_{25}\text{H}_{29}\text{N}_3\text{O}_4\text{Na}$ , 458.2050; Found: 458.2056.

**2,4-dibenzyl-6-undecyl-1,2,4-triazine-3,5(2H,4H)-dione (3a)**

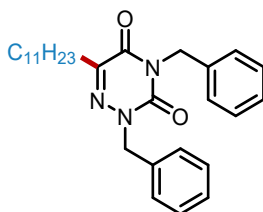

Purification by flash column chromatography (PE:EA, 60:1 v/v). White solid (69.7 mg, 78% yield), mp 43.1 – 45.1 °C.  $^1\text{H}$  NMR (400 MHz, Chloroform-*d*)  $\delta$  7.51 (d,  $J = 2.0$  Hz, 1H), 7.49 (d,  $J = 1.6$  Hz, 1H), 7.43 (dd,  $J = 7.9, 1.8$  Hz, 2H), 7.40 – 7.29 (m, 6H), 5.13 (s, 2H), 5.11 (s, 2H), 2.66 – 2.58 (m, 2H), 1.63 (d,  $J = 5.6$  Hz, 2H), 1.37 – 1.29 (m, 16H), 0.91 (t,  $J = 6.8$  Hz, 3H).  $^{13}\text{C}$  NMR (101 MHz, Chloroform-*d*)  $\delta$  156.1, 149.0, 145.8, 135.9, 135.8, 129.4, 128.7,

128.6, 128.1, 128.0, 55.2, 44.2, 31.9, 30.3, 29.64, 29.57, 29.37, 29.35, 29.2, 26.2, 22.7, 14.1.  
HRMS (ESI-TOF)  $m/z$ :  $[M + Na]^+$  Calcd for  $C_{28}H_{37}N_3O_2Na$ , 470.2778; Found: 470.2780.

**2,4-bis(4-methylbenzyl)-6-undecyl-1,2,4-triazine-3,5(2H,4H)-dione (3b)**

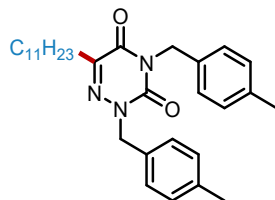

Purification by flash column chromatography (PE:EA, 60:1 v/v). White solid (76.1 mg, 80% yield), mp 60.3 – 62.3 °C.  $^1H$  NMR (400 MHz, Chloroform- $d$ )  $\delta$  7.43 (d,  $J$  = 8.1 Hz, 2H), 7.34 (d,  $J$  = 8.0 Hz, 2H), 7.17 (dd,  $J$  = 11.7, 7.8 Hz, 4H), 5.08 (s, 2H), 5.08 (s, 2H), 2.68 – 2.59 (m, 2H), 2.38 (s, 3H), 2.36 (s, 3H), 1.65 (t,  $J$  = 7.3 Hz, 2H), 1.39-1.32 (m, 16H), 0.95 (d,  $J$  = 6.6 Hz, 3H).  $^{13}C$  NMR (101 MHz, Chloroform- $d$ )  $\delta$  156.1, 149.0, 145.7, 137.9, 137.8, 133.0, 132.9, 129.5, 129.3, 129.2, 128.7, 55.0, 43.9, 32.0, 30.3, 29.7, 29.6, 29.41, 29.39, 29.2, 26.2, 22.7, 21.2, 14.2. HRMS (ESI-TOF)  $m/z$ :  $[M + Na]^+$  Calcd for  $C_{30}H_{41}N_3O_2Na$ , 498.3091; Found: 498.3089.

**2,4-dimethyl-6-undecyl-1,2,4-triazine-3,5(2H,4H)-dione (3c)**

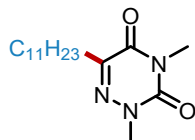

Purification by flash column chromatography (PE:EA, 60:1 v/v). White solid (42.5 mg, 72% yield), mp 40.9 – 42.9 °C.  $^1H$  NMR (400 MHz, Chloroform- $d$ )  $\delta$  3.62 (s, 3H), 3.35 (s, 3H), 2.79 – 2.43 (m, 2H), 1.61 (td,  $J$  = 8.9, 8.3, 4.6 Hz, 2H), 1.64 – 1.27 (m, 16H), 0.88 (t,  $J$  = 6.8 Hz, 3H).  $^{13}C$  NMR (101 MHz, Chloroform- $d$ )  $\delta$  156.5, 149.4, 145.2, 39.3, 31.9, 30.4, 29.6, 29.5, 29.3, 29.2, 27.1, 26.5, 22.7, 14.1. HRMS (ESI-TOF)  $m/z$ :  $[M + Na]^+$  Calcd for  $C_{16}H_{29}N_3O_2Na$ , 318.2152; Found: 318.2148.

**2,4-dibutyl-6-undecyl-1,2,4-triazine-3,5(2H,4H)-dione (3d)**

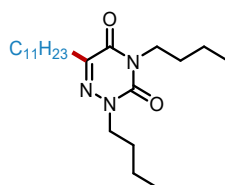

Purification by flash column chromatography (PE:EA, 60:1 v/v). Colorless oil (61.4 mg, 81% yield).  $^1\text{H}$  NMR (400 MHz, Chloroform-*d*)  $\delta$  3.96 – 3.90 (m, 4H), 2.64 – 2.53 (m, 2H), 1.72 (td,  $J = 7.1, 3.1$  Hz, 2H), 1.65 – 1.58 (m, 4H), 1.41 – 1.26 (m, 20H), 0.95 (td,  $J = 7.4, 4.3$  Hz, 6H), 0.88 (t,  $J = 6.8$  Hz, 3H).  $^{13}\text{C}$  NMR (101 MHz, Chloroform-*d*)  $\delta$  156.1, 148.9, 145.2, 51.2, 40.7, 31.9, 30.3, 30.3, 29.6, 29.5, 29.3, 29.2, 26.4, 22.7, 20.2, 19.7, 14.1, 13.7. HRMS (ESI-TOF)  $m/z$ :  $[\text{M} + \text{H}]^+$  Calcd for  $\text{C}_{22}\text{H}_{42}\text{N}_3\text{O}_2$ , 380.3272; Found: 380.3271.

**2,4-diallyl-6-undecyl-1,2,4-triazine-3,5(2H,4H)-dione (3e)**

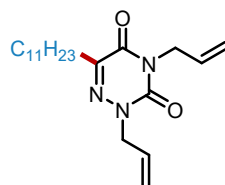

Purification by flash column chromatography (PE:EA, 60:1 v/v). White solid (52.9 mg, 75% yield), mp 39.1 – 41.1 °C.  $^1\text{H}$  NMR (400 MHz, Chloroform-*d*)  $\delta$  6.02 – 5.92 (m, 1H), 5.92 – 5.82 (m, 1H), 5.37 – 5.29 (m, 2H), 5.27 – 5.21 (m, 2H), 4.57 (dd,  $J = 2.9, 1.5$  Hz, 2H), 4.56 – 4.53 (m, 2H), 2.68 – 2.58 (m, 2H), 1.65 – 1.61 (m, 2H), 1.41 – 1.19 (m, 16H), 0.90 (t,  $J = 6.8$  Hz, 3H).  $^{13}\text{C}$  NMR (101 MHz, Chloroform-*d*)  $\delta$  155.8, 148.6, 145.8, 131.6, 130.5, 119.1, 118.8, 53.9, 42.9, 31.9, 30.3, 29.6, 29.5, 29.33, 29.23, 29.2, 26.4, 22.7, 14.1. HRMS (ESI-TOF)  $m/z$ :  $[\text{M} + \text{H}]^+$  Calcd for  $\text{C}_{20}\text{H}_{34}\text{N}_3\text{O}_2$ , 348.2651; Found: 348.2650.

**2,4-di(prop-2-yn-1-yl)-6-undecyl-1,2,4-triazine-3,5(2H,4H)-dione (3f)**

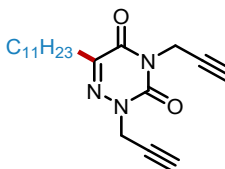

Purification by flash column chromatography (PE:EA, 60:1 v/v). White solid (53.5 mg, 78% yield), mp 34.1 – 36.1 °C.  $^1\text{H}$  NMR (400 MHz, Chloroform-*d*)  $\delta$  4.76 (d,  $J = 2.50$  Hz, 2H), 4.71 (d,  $J = 2.5$  Hz, 2H), 2.66 (t,  $J = 7.7$  Hz, 2H), 2.37 (s, 1H), 2.24 (s, 1H), 1.66 (t,  $J = 7.5$  Hz, 2H),



1.43 – 1.18 (m, 16H), 0.90 (t,  $J = 6.7$  Hz, 3H).  $^{13}\text{C}$  NMR (101 MHz, Chloroform- $d$ )  $\delta$  155.1, 147.7, 146.5, 73.3, 71.6, 41.2, 31.9, 30.4, 30.0, 29.6, 29.5, 29.33, 29.29, 29.2, 26.2, 22.7, 14.1. HRMS (ESI-TOF)  $m/z$ :  $[\text{M} + \text{H}]^+$  Calcd for  $\text{C}_{20}\text{H}_{30}\text{N}_3\text{O}_2$ , 344.2333; Found: 344.2341.

**2,4-bis(2-(4-methoxyphenyl)-2-oxoethyl)-6-undecyl-1,2,4-triazine-3,5(2H,4H)-dione (3g)**

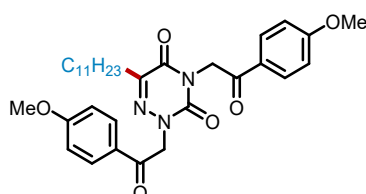

Purification by flash column chromatography (PE:EA, 60:1 v/v). Colorless oil (85.6 mg, 76% yield).  $^1\text{H}$  NMR (400 MHz, Chloroform- $d$ )  $\delta$  7.98 (d,  $J = 7.5$  Hz, 2H), 7.96 (d,  $J = 8.1$  Hz, 2H), 6.96 (dd,  $J = 8.9, 3.6$  Hz, 4H), 5.36 (s, 2H), 5.36 (s, 2H), 3.87 (s, 3H), 3.86 (s, 3H), 2.70 – 2.53 (m, 2H), 1.74 – 1.54 (m, 2H), 1.48 – 1.15 (m, 16H), 0.88 (t,  $J = 6.8$  Hz, 3H).  $^{13}\text{C}$  NMR (101 MHz, Chloroform- $d$ )  $\delta$  190.1, 188.9, 164.2, 164.1, 155.9, 149.2, 146.1, 130.5, 130.4, 127.6, 127.5, 114.1, 114.0, 57.1, 55.53, 55.52, 46.2, 31.9, 30.4, 29.6, 29.5, 29.4, 29.3, 29.2, 26.3, 22.7, 14.1. HRMS (ESI-TOF)  $m/z$ :  $[\text{M} + \text{Na}]^+$  Calcd for  $\text{C}_{32}\text{H}_{41}\text{N}_3\text{O}_6\text{Na}$ , 586.2888; Found: 586.2888.

**4-benzyl-2-isopropyl-6-undecyl-1,2,4-triazine-3,5(2H,4H)-dione (3h)**

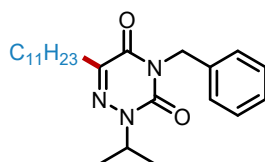

Purification by flash column chromatography (PE:EA, 60:1 v/v). Colorless oil (61.4 mg, 77% yield).  $^1\text{H}$  NMR (400 MHz, Chloroform- $d$ )  $\delta$  7.54 (d,  $J = 1.8$  Hz, 1H), 7.52 (d,  $J = 1.5$  Hz, 1H), 7.40 – 7.30 (m, 3H), 5.12 (s, 2H), 4.98 – 4.92 (m, 1H), 3.00 – 2.50 (m, 2H), 1.65 – 1.59 (m, 2H), 1.44 – 1.21 (m, 23H), 0.91 (t,  $J = 6.8$  Hz, 3H).  $^{13}\text{C}$  NMR (101 MHz, Chloroform- $d$ )  $\delta$  155.9, 148.8, 145.1, 136.0, 129.5, 128.5, 127.9, 50.4, 44.1, 31.9, 30.3, 29.63, 29.61, 29.58, 29.4, 29.3, 29.2, 26.1, 22.7, 20.6, 14.1. HRMS (ESI-TOF)  $m/z$ :  $[\text{M} + \text{Na}]^+$  Calcd for  $\text{C}_{24}\text{H}_{37}\text{N}_3\text{O}_2\text{Na}$ , 422.2778; Found: 422.2776.

**4-(2-(4-hydroxyphenyl)-2-oxoethyl)-2-methyl-6-undecyl-1,2,4-triazine-3,5(2H,4H)-dione (3i)**

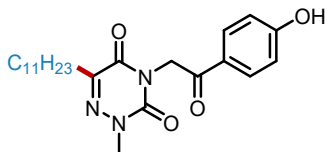

Purification by flash column chromatography (PE:EA, 60:1 v/v). White solid (53.9 mg, 65% yield), mp 61.5 – 63.5 °C. <sup>1</sup>H NMR (400 MHz, Chloroform-*d*) δ 7.79 (d, *J* = 8.4 Hz, 2H), 6.85 (d, *J* = 8.4 Hz, 2H), 5.34 (s, 2H), 3.37 (s, 3H), 2.62 (t, *J* = 7.7 Hz, 2H), 1.60-1.62 (m, 2H), 1.37-1.25 (m, 16H), 0.88 (t, *J* = 6.7 Hz, 3H). <sup>13</sup>C NMR (101 MHz, Chloroform-*d*) δ 190.5, 162.0, 156.4, 150.1, 146.6, 130.6, 126.7, 115.8, 57.3, 31.9, 30.4, 29.6, 29.5, 29.32, 29.30, 29.2, 27.3, 26.3, 22.7, 14.1. HRMS (ESI-TOF) *m/z*: [M + Na]<sup>+</sup> Calcd for C<sub>23</sub>H<sub>33</sub>N<sub>3</sub>O<sub>4</sub>Na, 438.2363; Found: 438.2368.

**2-methyl-6-undecyl-1,2,4-triazine-3,5(2H,4H)-dione (3j)**

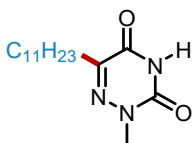

Purification by flash column chromatography (PE:EA, 50:1 v/v). Yellow solid (38.8 mg, 69% yield), mp 68.1 – 70.1 °C. <sup>1</sup>H NMR (400 MHz, Chloroform-*d*) δ 10.33 (s, 1H), 3.36 (s, 3H), 2.67 – 2.51 (m, 2H), 1.72 – 1.53 (m, 2H), 1.42 – 1.11 (m, 16H), 0.89 (t, *J* = 6.81 Hz, 3H). <sup>13</sup>C NMR (101 MHz, Chloroform-*d*) δ 156.4, 150.5, 146.4, 31.9, 30.3, 29.63, 29.61, 29.5, 29.3, 29.2, 26.5, 26.2, 22.7, 14.1. HRMS (ESI-TOF) *m/z*: [M + H]<sup>+</sup> Calcd for C<sub>15</sub>H<sub>28</sub>N<sub>3</sub>O<sub>2</sub>, 282.2176; Found: 282.2181.

**4-benzyl-6-undecyl-1,2,4-triazine-3,5(2H,4H)-dione (3k)**

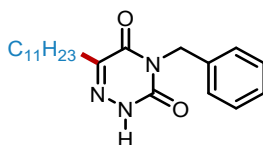

Purification by flash column chromatography (PE:EA, 50:1 v/v). White solid (50.1 mg, 70% yield), mp 63.2 – 65.2 °C. <sup>1</sup>H NMR (400 MHz, Chloroform-*d*) δ 9.60 (s, 1H), 7.53 – 7.51 (m, 2H), 7.38 – 7.30 (m, 3H), 5.10 (s, 2H), 2.86 – 2.34 (m, 2H), 1.97 – 1.53 (m, 2H), 1.48 – 1.08

(m, 16H), 0.90 (t,  $J = 6.8$  Hz, 3H).  $^{13}\text{C}$  NMR (101 MHz, Chloroform- $d$ )  $\delta$  156.1, 146.8, 135.5, 129.4, 128.6, 128.1, 43.6, 31.9, 30.3, 29.6, 29.5, 29.3, 29.2, 26.1, 22.7, 14.1. HRMS (ESI-TOF)  $m/z$ :  $[\text{M} + \text{Na}]^+$  Calcd for  $\text{C}_{21}\text{H}_{31}\text{N}_3\text{O}_2\text{Na}$ , 380.2308; Found: 380.2307.

**4-(4-methylbenzyl)-6-undecyl-1,2,4-triazine-3,5(2H,4H)-dione (3l)**

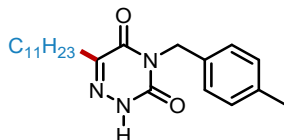

Purification by flash column chromatography (PE:EA, 50:1 v/v). White solid (52.7 mg, 71% yield), mp 57.1 – 59.1 °C.  $^1\text{H}$  NMR (400 MHz, Chloroform- $d$ )  $\delta$  10.04 (s, 1H), 7.42 (s, 1H), 7.40 (s, 1H), 7.16 (s, 1H), 7.14 (s, 1H), 5.07 (s, 2H), 2.68 – 2.52 (m, 2H), 2.34 (s, 3H), 1.63 (t,  $J = 7.7$  Hz, 2H), 1.44 – 1.18 (m, 16H), 0.91 (t,  $J = 6.8$  Hz, 3H).  $^{13}\text{C}$  NMR (101 MHz, Chloroform- $d$ )  $\delta$  156.1, 150.1, 146.8, 137.9, 132.5, 129.5, 129.3, 43.3, 31.9, 30.3, 29.6, 29.5, 29.3, 29.2, 26.2, 22.7, 21.2, 14.1. HRMS (ESI-TOF)  $m/z$ :  $[\text{M} + \text{Na}]^+$  Calcd for  $\text{C}_{22}\text{H}_{33}\text{N}_3\text{O}_2\text{Na}$ , 394.2465; Found: 394.2465.

**2,4-dibenzyl-6-(cyclopentylmethyl)-1,2,4-triazine-3,5(2H,4H)-dione (3m)**

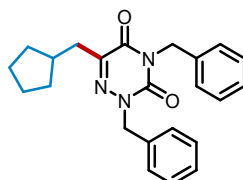

Purification by flash column chromatography (PE:EA, 60:1 v/v). Colorless oil (45.1 mg, 60% yield).  $^1\text{H}$  NMR (400 MHz, Chloroform- $d$ )  $\delta$  7.55 – 7.50 (m, 2H), 7.46 – 7.30 (m, 8H), 5.13 (s, 2H), 5.12 (s, 2H), 2.65 (d,  $J = 7.3$  Hz, 2H), 2.33 – 2.25 (m, 1H), 1.85 – 1.50 (m, 8H), 1.27 – 1.17 (m, 2H).  $^{13}\text{C}$  NMR (101 MHz, Chloroform- $d$ )  $\delta$  156.2, 149.0, 145.5, 135.9, 135.8, 129.5, 128.7, 128.6, 128.2, 128.0, 55.2, 44.2, 37.1, 36.2, 32.4, 25.0. HRMS (ESI-TOF)  $m/z$ :  $[\text{M} + \text{Na}]^+$  Calcd for  $\text{C}_{23}\text{H}_{25}\text{N}_3\text{O}_2\text{Na}$  398.1839; Found: 398.1843.

**2,4-dibenzyl-6-heptyl-1,2,4-triazine-3,5(2H,4H)-dione (3n)**

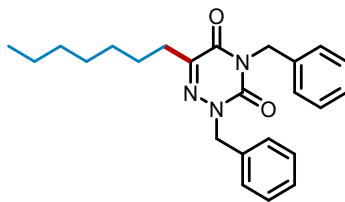

Purification by flash column chromatography (PE:EA, 60:1 v/v). Colorless oil (50.8 mg, 65% yield).  $^1\text{H}$  NMR (400 MHz, Chloroform-*d*)  $\delta$  7.54 – 7.49 (m, 2H), 7.44 (dd,  $J$  = 8.0, 1.8 Hz, 2H), 7.39 – 7.31 (m, 6H), 5.12 (s, 2H), 5.11 (s, 2H), 2.66 – 2.60 (m, 2H), 1.65 (dd,  $J$  = 8.8, 6.0 Hz, 2H), 1.37 – 1.28 (m, 8H), 0.93 (q,  $J$  = 2.8 Hz, 3H).  $^{13}\text{C}$  NMR (101 MHz, Chloroform-*d*)  $\delta$  156.1, 149.0, 145.8, 135.9, 135.8, 129.4, 128.69, 128.68, 128.6, 128.2, 128.0, 55.2, 44.2, 31.8, 30.3, 29.1, 29.0, 26.2, 22.6, 14.1. HRMS (ESI-TOF)  $m/z$ :  $[\text{M} + \text{Na}]^+$  Calcd for  $\text{C}_{24}\text{H}_{29}\text{N}_3\text{O}_2\text{Na}$  414.2152; Found: 414.2155.

**2,4-dibenzyl-6-phenethyl-1,2,4-triazine-3,5(2H,4H)-dione (3o)**

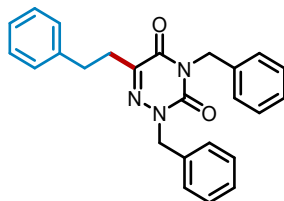

Purification by flash column chromatography (PE:EA, 60:1 v/v). White solid (47.6 mg, 60% yield), mp 61.2 – 63.2 °C.  $^1\text{H}$  NMR (400 MHz, Chloroform-*d*)  $\delta$  7.52 (dd,  $J$  = 7.9, 1.7 Hz, 2H), 7.43 – 7.04 (m, 13H), 5.13 (s, 2H), 5.11 (s, 2H), 3.02 (d,  $J$  = 2.8 Hz, 2H), 3.01 (d,  $J$  = 2.8 Hz, 1H).  $^{13}\text{C}$  NMR (101 MHz, Chloroform-*d*)  $\delta$  156.0, 149.0, 144.7, 140.7, 135.8, 135.7, 129.4, 128.8, 128.64, 128.63, 128.56, 128.5, 128.2, 128.1, 126.2, 55.3, 44.2, 32.1, 31.9. HRMS (ESI-TOF)  $m/z$ :  $[\text{M} + \text{Na}]^+$  Calcd for  $\text{C}_{25}\text{H}_{23}\text{N}_3\text{O}_2\text{Na}$  420.1683; Found: 420.1683.

**2,4-dibenzyl-6-(3,3,3-trifluoropropyl)-1,2,4-triazine-3,5(2H,4H)-dione (3p)**

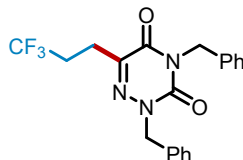

Purification by flash column chromatography (PE:EA, 60:1 v/v). Colorless oil (47.4 mg, 61% yield).  $^1\text{H}$  NMR (400 MHz, Chloroform-*d*)  $\delta$  7.58 – 7.47 (m, 2H), 7.46 – 7.31 (m, 8H), 5.13 (s, 2H), 5.12 (s, 2H), 2.96 – 2.89 (m, 2H), 2.59 – 2.40 (m, 2H).  $^{13}\text{C}$  NMR (101 MHz, Chloroform-*d*)  $\delta$  155.6, 148.8, 142.3, 135.5, 135.4, 129.5, 128.8, 128.7, 128.6, 128.4, 128.2, 126.7 (q,  $J$  = 276.4

Hz), 55.4, 44.3, 30.0 (q,  $J = 29.6$  Hz), 29.7, 23.4 (q,  $J = 3.4$  Hz).  $^{19}\text{F}$  NMR (376 MHz, Chloroform- $d$ )  $\delta$  -66.32. HRMS (ESI-TOF)  $m/z$ :  $[\text{M} + \text{Na}]^+$  Calcd for  $\text{C}_{20}\text{H}_{18}\text{N}_3\text{O}_2\text{NaF}_3$  412.1243; Found: 412.1245.

**6-(((1*R*,3*S*,5*r*,7*r*)-adamantan-2-yl)methyl)-2,4-dibenzyl-1,2,4-triazine-3,5(2*H*,4*H*)-dione (3*q*)**

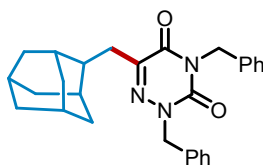

Purification by flash column chromatography (PE:EA, 60:1 v/v). Colorless oil (50.9 mg, 57% yield).  $^1\text{H}$  NMR (400 MHz, Chloroform- $d$ )  $\delta$  7.52 – 7.47 (m, 2H), 7.45 – 7.40 (m, 2H), 7.38 – 7.30 (m, 6H), 5.12 (s, 2H), 5.11 (s, 2H), 2.43 (s, 2H), 1.97 – 1.91 (m, 3H), 1.72 – 1.66 (m, 3H), 1.61 – 1.56 (m, 3H), 1.52 (d,  $J = 2.8$  Hz, 6H).  $^{13}\text{C}$  NMR (101 MHz, Chloroform- $d$ )  $\delta$  156.6, 148.9, 143.7, 135.9, 135.8, 129.3, 128.7, 128.63, 128.55, 128.1, 128.0, 55.2, 44.3, 42.7, 42.3, 36.8, 34.5, 28.6. HRMS (ESI-TOF)  $m/z$ :  $[\text{M} + \text{Na}]^+$  Calcd for  $\text{C}_{28}\text{H}_{31}\text{N}_3\text{O}_2\text{Na}$  464.2308; Found: 464.2310.

**2,4-dibenzyl-6-(3-bromopropyl)-1,2,4-triazine-3,5(2*H*,4*H*)-dione (3*r*)**

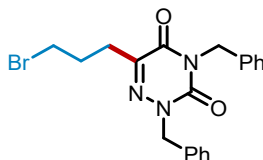

Purification by flash column chromatography (PE:EA, 60:1 v/v). Colorless oil (49.6 mg, 60% yield).  $^1\text{H}$  NMR (400 MHz, Chloroform- $d$ )  $\delta$  7.54 – 7.48 (m, 2H), 7.45 – 7.32 (m, 8H), 5.12 (s, 2H), 5.11 (s, 2H), 3.46 (t,  $J = 6.6$  Hz, 2H), 2.81 (t,  $J = 7.3$  Hz, 2H), 2.23 (p,  $J = 6.8$  Hz, 2H).  $^{13}\text{C}$  NMR (101 MHz, Chloroform- $d$ )  $\delta$  155.9, 148.9, 144.1, 135.7, 135.6, 129.5, 128.81, 128.78, 128.6, 128.3, 128.1, 55.2, 44.3, 32.6, 28.9, 28.8. HRMS (ESI-TOF)  $m/z$ :  $[\text{M} + \text{Na}]^+$  Calcd for  $\text{C}_{20}\text{H}_{20}\text{N}_3\text{O}_2\text{NaBr}$  436.0631; Found: 436.0635.

**2,4-dibenzyl-6-cyclohexyl-1,2,4-triazine-3,5(2*H*,4*H*)-dione (3*s*)**

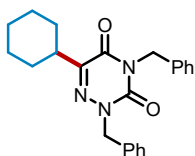

Purification by flash column chromatography (PE:EA, 60:1 v/v). White solid (47.3 mg, 63% yield), mp 71.1– 73.1 °C. <sup>1</sup>H NMR (400 MHz, Chloroform-*d*) δ 7.55 – 7.50 (m, 2H), 7.46 – 7.42 (m, 2H), 7.40 – 7.30 (m, 6H), 5.11 (s, 2H), 5.11 (s, 2H), 2.94 – 2.87(m, 1H), 1.94 – 1.75 (m, 5H), 1.45 – 1.28 (m, 5H). <sup>13</sup>C NMR (101 MHz, Chloroform-*d*) δ 155.7, 149.0, 148.9, 135.93, 135.86, 129.5, 128.8, 128.7, 128.5, 128.1, 128.0, 55.3, 44.2, 38.5, 30.5, 26.1, 26.0. HRMS (ESI-TOF) *m/z*: [M + Na]<sup>+</sup> Calcd for C<sub>23</sub>H<sub>25</sub>N<sub>3</sub>O<sub>2</sub>Na 398.1839; Found: 398.1839.

**2-(2,6-dimethyl-4-(4-methyl-3,5-dioxo-6-undecyl-4,5-dihydro-1,2,4-triazin-2(3H)-yl)phenyl)-2-(*p*-tolyl)acetonitrile (3t)**

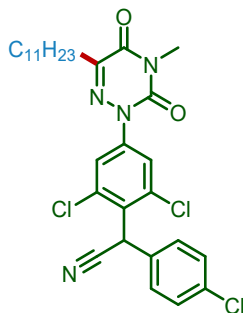

Purification by flash column chromatography (PE:EA, 40:1 v/v). Yellow oil (49.2 mg, 46% yield). <sup>1</sup>H NMR (400 MHz, Chloroform-*d*) δ 7.80 (s, 2H), 7.38 – 7.32 (m, 4H), 6.20 (s, 1H), 3.45 (s, 3H), 2.73 (d, *J* = 7.7 Hz, 2H), 1.70 (t, *J* = 7.8 Hz, 2H), 1.29 (d, *J* = 8.5 Hz, 16H), 0.91 (d, *J* = 6.7 Hz, 3H). <sup>13</sup>C NMR (101 MHz, Chloroform-*d*) δ 155.4, 148.2, 147.6, 141.7, 135.7, 134.3, 130.9, 129.6, 129.2, 128.2, 124.8, 116.3, 37.0, 31.9, 30.6, 29.62, 29.59, 29.5, 29.32, 29.30, 29.2, 27.6, 26.3, 22.7, 14.1. HRMS (ESI-TOF) *m/z*: [M + Na]<sup>+</sup> Calcd for C<sub>29</sub>H<sub>33</sub>Cl<sub>3</sub>N<sub>4</sub>NaO<sub>2</sub>, 597.1561; Found: 597.1520.

**2-(4-(4-methylbenzyl)-3,5-dioxo-6-undecyl-4,5-dihydro-1,2,4-triazin-2(3H)-yl)ethyl 2-(4-(2,2-dichlorocyclopropyl)phenoxy)-2-methylpropanoate (3u)**

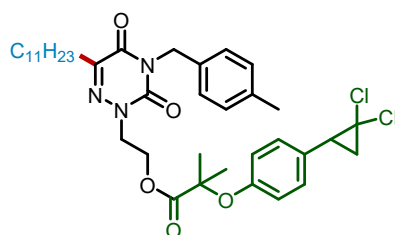

Purification by flash column chromatography (PE:EA, 60:1 v/v). Yellow oil (68.53 mg, 50% yield).  $^1\text{H}$  NMR (400 MHz, Chloroform-*d*)  $\delta$  7.36 (d,  $J = 8.1$  Hz, 2H), 7.09 (d,  $J = 7.9$  Hz, 2H), 7.06 – 7.02 (m, 2H), 6.77 – 6.72 (m, 2H), 4.99 (s, 2H), 4.46 (t,  $J = 5.2$  Hz, 2H), 4.23 – 4.16 (m, 2H), 2.80 (dd,  $J = 10.7, 8.3$  Hz, 1H), 2.55 – 2.48 (m, 2H), 2.30 (s, 3H), 1.92 (dd,  $J = 10.7, 7.4$  Hz, 1H), 1.75 (dd,  $J = 8.4, 7.4$  Hz, 1H), 1.61 – 1.54 (m, 2H), 1.51 (s, 6H), 1.26 (s, 16H), 0.89 (d,  $J = 6.4$  Hz, 3H).  $^{13}\text{C}$  NMR (101 MHz, Chloroform-*d*)  $\delta$  174.1, 156.0, 154.9, 149.2, 146.2, 138.0, 132.9, 129.7, 129.6, 129.4, 128.4, 118.9, 62.3, 61.0, 50.2, 44.0, 35.0, 32.1, 30.5, 29.8, 29.8, 29.7, 29.50, 29.46, 26.5, 26.0, 25.5, 25.4, 22.8, 21.3, 14.3. HRMS (ESI-TOF)  $m/z$ :  $[\text{M} + \text{Na}]^+$  Calcd for  $\text{C}_{37}\text{H}_{49}\text{N}_3\text{O}_5\text{NaCl}_2$ , 708.2941; Found: 708.2947.

**2-(4-(4-methylbenzyl)-3,5-dioxo-6-undecyl-4,5-dihydro-1,2,4-triazin-2(3H)-yl)ethyl 2-(4-chlorophenoxy)-2-methylpropanoate (3v)**

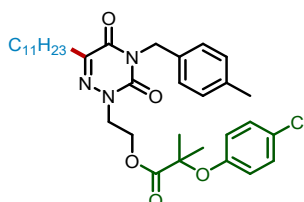

Purification by flash column chromatography (PE:EA, 60:1 v/v). Yellow oil (63.5 mg, 52% yield).  $^1\text{H}$  NMR (400 MHz, Chloroform-*d*)  $\delta$  7.34 (d,  $J = 8.1$  Hz, 2H), 7.26 (s, 1H), 7.17 – 7.06 (m, 4H), 6.75 – 6.65 (m, 2H), 4.98 (s, 2H), 4.45 (dd,  $J = 5.7, 4.5$  Hz, 2H), 4.20 (dd,  $J = 5.7, 4.5$  Hz, 2H), 2.30 (s, 3H), 1.50 (s, 6H).  $^{13}\text{C}$  NMR (101 MHz, Chloroform-*d*)  $\delta$  173.7, 155.8, 153.9, 149.1, 146.1, 137.8, 129.5, 129.2, 129.1, 127.3, 120.47, 120.46, 62.3, 50.1, 43.9, 31.9, 30.4, 29.7, 29.6, 29.5, 29.4, 29.3, 26.4, 25.2, 22.7, 21.2, 14.2. HRMS (ESI-TOF)  $m/z$ :  $[\text{M} + \text{Na}]^+$  Calcd for  $\text{C}_{34}\text{H}_{46}\text{N}_3\text{O}_5\text{NaCl}$ , 634.3018; Found: 634.3021.

**2-(4-(4-methylbenzyl)-3,5-dioxo-6-undecyl-4,5-dihydro-1,2,4-triazin-2(3H)-yl)ethyl 2-(2-fluoro-[1,1'-biphenyl]-4-yl)propanoate (3w)**

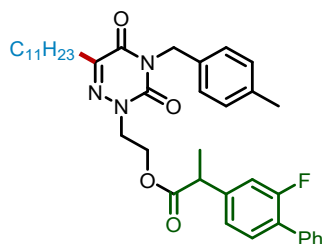

Purification by flash column chromatography (PE:EA, 60:1 v/v). Colorless oil (65.4 mg, 51% yield).  $^1\text{H}$  NMR (400 MHz, Chloroform-*d*)  $\delta$  7.57 (dt,  $J = 8.1, 1.5$  Hz, 2H), 7.50 – 7.35 (m, 6H), 7.16 (d,  $J = 7.8$  Hz, 2H), 7.11 – 7.06 (m, 2H), 5.07 (d,  $J = 2.1$  Hz, 2H), 4.56 – 4.15 (m, 4H), 3.67 (q,  $J = 7.2$  Hz, 1H), 2.59 (dd,  $J = 8.6, 6.9$  Hz, 2H), 2.34 (s, 3H), 1.61 (dd,  $J = 9.8, 5.1$  Hz, 2H), 1.51 (d,  $J = 7.2$  Hz, 3H), 1.32 (d,  $J = 16.7$  Hz, 16H), 0.92 (t,  $J = 6.8$  Hz, 3H).  $^{13}\text{C}$  NMR (101 MHz, Chloroform-*d*)  $\delta$  173.7, 159.7 (d,  $J = 248.6$  Hz), 155.9, 149.2, 146.1, 141.5 (d,  $J = 7.7$  Hz), 137.9, 135.4, 132.8, 130.8 (d,  $J = 4.0$  Hz), 129.5, 129.2, 129.0 (d,  $J = 3.0$  Hz), 128.5, 127.9 (d,  $J = 13.5$  Hz), 127.7, 123.5 (d,  $J = 3.4$  Hz), 115.3 (d,  $J = 23.6$  Hz), 61.8, 50.0, 44.9, 43.9, 31.9, 30.4, 29.7, 29.6, 29.4, 29.3, 26.4, 22.7, 21.2, 18.3, 14.2.  $^{19}\text{F}$  NMR (376 MHz, Chloroform-*d*)  $\delta$  -117.36. HRMS (ESI-TOF)  $m/z$ :  $[\text{M} + \text{Na}]^+$  Calcd for  $\text{C}_{39}\text{H}_{48}\text{N}_3\text{O}_4\text{NaF}$ , 664.3521; Found: 664.3527.

**2-(4-benzyl-3,5-dioxo-6-undecyl-4,5-dihydro-1,2,4-triazin-2(3H)-yl)ethyl acetate (3x)** 2-

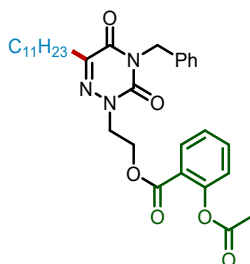

Purification by flash column chromatography (PE:EA, 60:1 v/v). Colorless oil (45.1 mg, 40% yield).  $^1\text{H}$  NMR (400 MHz, Chloroform-*d*)  $\delta$  7.99 (dd,  $J = 7.9, 1.7$  Hz, 1H), 7.58 (td,  $J = 7.8, 1.7$  Hz, 1H), 7.52 – 7.46 (m, 2H), 7.34 – 7.27 (m, 4H), 7.11 (dd,  $J = 8.1, 1.2$  Hz, 1H), 5.11 (s, 2H), 4.61 (dd,  $J = 5.8, 4.7$  Hz, 2H), 4.34 (dd,  $J = 5.8, 4.7$  Hz, 2H), 2.60 – 2.54 (m, 2H), 2.28 (s, 3H), 1.57 – 1.49 (m, 2H), 1.32 – 1.25 (m, 16H), 0.91 (t,  $J = 6.78$  Hz, 3H).  $^{13}\text{C}$  NMR (101 MHz, Chloroform-*d*)  $\delta$  169.6, 163.9, 156.0, 151.0, 149.2, 146.2, 135.7, 134.1, 131.8, 129.3, 128.5, 128.0, 126.0, 123.9, 122.6, 61.8, 50.3, 44.2, 31.9, 30.3, 29.64, 29.61, 29.5, 29.4, 29.3, 29.3,



26.2, 22.7, 20.9, 14.1. HRMS (ESI-TOF)  $m/z$ :  $[M + Na]^+$  Calcd for  $C_{32}H_{41}N_3O_6Na$ , 586.2888; Found: 586.2889.

**2-(4-benzyl-3,5-dioxo-6-undecyl-4,5-dihydro-1,2,4-triazin-2(3H)-yl)ethyl 2-(4-isobutylphenyl)propanoate(3y)**

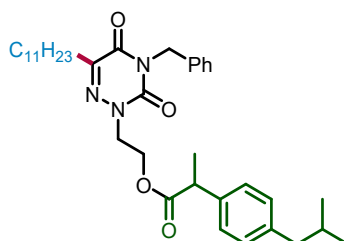

Purification by flash column chromatography (PE:EA, 60:1 v/v). Colorless oil (58.9 mg, 50% yield).  $^1H$  NMR (400 MHz, Chloroform- $d$ )  $\delta$  7.50 – 7.45 (m, 2H), 7.33 – 7.27 (m, 3H), 7.10 (d,  $J = 8.0$  Hz, 2H), 7.01 (d,  $J = 7.9$  Hz, 2H), 5.06 (s, 2H), 4.43 – 4.08 (m, 4H), 3.58 (q,  $J = 7.2$  Hz, 1H), 2.57 – 2.50 (m, 2H), 2.42 (d,  $J = 7.2$  Hz, 2H), 1.87 – 1.77 (m, 1H), 1.56 (t,  $J = 7.5$  Hz, 2H), 1.41 (d,  $J = 7.2$  Hz, 3H), 1.28 (d,  $J = 17.5$  Hz, 16H), 0.88 (t,  $J = 6.9$  Hz, 9H).  $^{13}C$  NMR (101 MHz, Chloroform- $d$ )  $\delta$  174.2, 155.7, 148.9, 145.7, 140.4, 137.2, 135.5, 129.2, 129.1, 128.3, 127.8, 126.9, 61.2, 49.8, 44.8, 44.7, 43.9, 31.7, 30.1, 30.0, 29.43, 29.40, 29.3, 29.14, 29.05, 26.1, 22.5, 22.2, 18.2, 13.9. HRMS (ESI-TOF)  $m/z$ :  $[M + Na]^+$  Calcd for  $C_{36}H_{51}N_3O_4Na$ , 612.3772; Found: 612.3776.

**2-((2R,3R,4R,5R)-3,4-bis(benzyloxy)-5-((benzyloxy)methyl)tetrahydrofuran-2-yl)-4-methyl-6-undecyl-1,2,4-triazine-3,5(2H,4H)-dione (3z)**

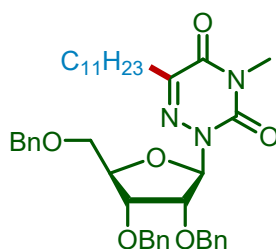

Purification by flash column chromatography (PE:EA, 60:1 v/v). Yellow oil (69.7 mg, 51% yield).  $^1H$  NMR (400 MHz, Chloroform- $d$ )  $\delta$  7.33 – 7.25 (m, 15H), 6.37 (d,  $J = 3.6$  Hz, 1H), 4.65 – 4.54 (m, 4H), 4.50 (d,  $J = 2.2$  Hz, 2H), 4.35 (q,  $J = 5.0$  Hz, 1H), 4.29 (dd,  $J = 5.3, 3.7$  Hz, 1H), 4.19 (t,  $J = 5.5$  Hz, 1H), 3.63 – 3.54 (m, 2H), 3.30 (s, 3H), 2.49 – 2.41 (m, 2H), 1.47 – 1.40 (m, 2H), 1.25 (s, 16H), 0.87 (d,  $J = 7.0$  Hz, 3H).  $^{13}C$  NMR (101 MHz, Chloroform- $d$ )  $\delta$

155.8, 149.0, 145.7, 138.0, 137.7, 137.4, 128.43, 128.37, 128.3, 128.1, 128.0, 127.9, 127.6, 127.5, 89.2, 81.2, 78.3, 73.3, 72.4, 72.3, 70.0, 31.9, 30.2, 29.72, 29.67, 29.66, 29.43, 29.38, 29.2, 27.2, 25.8, 22.7, 14.1. HRMS (ESI-TOF)  $m/z$ :  $[M + Na]^+$  Calcd for  $C_{41}H_{53}N_3O_6Na$ , 706.3827; Found: 706.3826.

**1-methyl-3-undecylquinoxalin-2(1H)-one (5a)<sup>5</sup>**

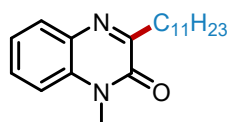

Purification by flash column chromatography (PE:EA, 40:1 v/v). White solid (45.8 mg, 73% yield).  $^1H$  NMR (400 MHz, Chloroform-*d*)  $\delta$  7.83 (dd,  $J = 8.0, 1.5$  Hz, 1H), 7.54 – 7.50 (m, 1H), 7.37 – 7.27 (m, 2H), 3.70 (s, 3H), 2.99 – 2.87 (m, 2H), 1.84 – 1.73 (m, 2H), 1.45 – 1.23 (m, 16H), 0.88 (t,  $J = 6.8$  Hz, 3H).  $^{13}C$  NMR (101 MHz, Chloroform-*d*)  $\delta$  161.4, 155.0, 133.1, 132.8, 129.6, 129.5, 123.5, 113.5, 34.4, 31.9, 29.7, 29.62, 29.57, 29.5, 29.4, 29.0, 26.9, 22.7, 14.1.

**1-ethyl-3-undecylquinoxalin-2(1H)-one (5b)**

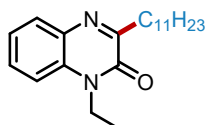

Purification by flash column chromatography (PE:EA, 50:1 v/v). Yellow oil (47.2 mg, 72% yield).  $^1H$  NMR (400 MHz, Chloroform-*d*)  $\delta$  7.84 (dd,  $J = 8.2, 1.6$  Hz, 1H), 7.51 (td,  $J = 7.7, 7.1, 1.6$  Hz, 1H), 7.32 (dd,  $J = 8.1, 6.1$  Hz, 2H), 4.32 (q,  $J = 7.2$  Hz, 2H), 2.98 – 2.90 (m, 2H), 1.78 (q,  $J = 7.7$  Hz, 2H), 1.46 – 1.25 (m, 19H), 0.88 (t,  $J = 6.8$  Hz, 3H).  $^{13}C$  NMR (101 MHz, Chloroform-*d*)  $\delta$  161.5, 154.4, 133.1, 132.0, 129.9, 129.4, 123.3, 113.4, 37.2, 34.3, 31.9, 29.7, 29.63, 29.58, 29.5, 29.4, 26.9, 22.7, 14.1, 12.4. HRMS (ESI-TOF)  $m/z$ :  $[M + H]^+$  Calcd for  $C_{21}H_{33}N_2O$ , 329.2587; Found: 329.2589.

**1-butyl-3-undecylquinoxalin-2(1H)-one (5c)**

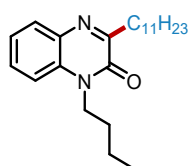

Purification by flash column chromatography (PE:EA, 50:1 v/v). Colorless oil (49.8 mg, 70% yield).  $^1\text{H}$  NMR (400 MHz, Chloroform-*d*)  $\delta$  7.83 (dd,  $J = 7.9, 1.5$  Hz, 1H), 7.52 – 7.48 (m, 1H), 7.35 – 7.27 (m, 2H), 4.28 – 4.21 (m, 2H), 2.98 – 2.89 (m, 2H), 1.83 – 1.69 (m, 4H), 1.53 – 1.42 (m, 4H), 1.37 – 1.23 (m, 14H), 1.00 (t,  $J = 7.4$  Hz, 3H), 0.90 – 0.85 (m, 3H).  $^{13}\text{C}$  NMR (101 MHz, Chloroform-*d*)  $\delta$  161.5, 154.6, 133.1, 132.3, 129.9, 129.4, 123.3, 113.6, 42.1, 34.3, 31.9, 29.7, 29.63, 29.58, 29.5, 29.4, 29.3, 26.9, 22.7, 20.3, 14.1, 13.8. HRMS (ESI-TOF)  $m/z$ :  $[\text{M} + \text{H}]^+$  Calcd for  $\text{C}_{23}\text{H}_{37}\text{N}_2\text{O}$ , 357.2900; Found: 357.2903.

**1-allyl-3-undecylquinoxalin-2(1H)-one (5d)**

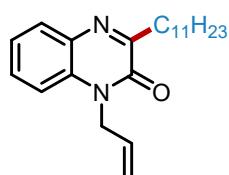

Purification by flash column chromatography (PE:EA, 40:1 v/v). Colorless oil (47.6 mg, 70% yield).  $^1\text{H}$  NMR (400 MHz, Chloroform-*d*)  $\delta$  7.86 (dd,  $J = 8.0, 1.5$  Hz, 1H), 7.52 – 7.48 (m, 1H), 7.37 – 7.28 (m, 2H), 6.01 – 5.91 (m, 1H), 5.28 (d,  $J = 10.4$  Hz, 1H), 5.18 (d,  $J = 17.4$  Hz, 1H), 4.93 (dd,  $J = 4.4, 2.6$  Hz, 2H), 3.00 – 2.92 (m, 2H), 1.85 – 1.77 (m, 2H), 1.47 (td,  $J = 8.7, 8.3, 4.3$  Hz, 2H), 1.37 – 1.27 (m, 14H), 0.90 (t,  $J = 6.7$  Hz, 3H).  $^{13}\text{C}$  NMR (101 MHz, Chloroform-*d*)  $\delta$  161.5, 154.5, 132.9, 132.3, 130.8, 129.7, 129.4, 123.5, 118.0, 114.1, 44.5, 34.3, 31.9, 29.7, 29.63, 29.58, 29.5, 29.4, 26.9, 22.7, 14.1. HRMS (ESI-TOF)  $m/z$ :  $[\text{M} + \text{H}]^+$  Calcd for  $\text{C}_{22}\text{H}_{33}\text{N}_2\text{O}$ , 341.2587; Found: 341.2585.

**1-(prop-2-yn-1-yl)-3-undecylquinoxalin-2(1H)-one (5e)**

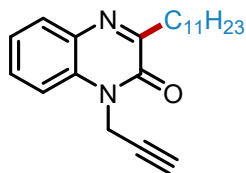

Purification by flash column chromatography (PE:EA, 40:1 v/v). White solid (46.6 mg, 69% yield), mp 37.5 – 39.5 °C.  $^1\text{H}$  NMR (400 MHz, Chloroform-*d*)  $\delta$  7.85 (dd,  $J = 8.0, 1.5$  Hz, 1H), 7.57 – 7.53 (m, 1H), 7.45 (dd,  $J = 8.4, 1.3$  Hz, 1H), 7.36 (td,  $J = 7.6, 1.3$  Hz, 1H), 5.06 (d,  $J = 2.6$  Hz, 2H), 2.98 – 2.91 (m, 2H), 2.28 (t,  $J = 2.5$  Hz, 1H), 1.83 – 1.75 (m, 2H), 1.42 – 1.24 (m, 16H), 0.88 (t,  $J = 6.8$  Hz, 3H).  $^{13}\text{C}$  NMR (101 MHz, Chloroform-*d*)  $\delta$  161.3, 153.9, 133.0,

131.6, 129.8, 129.6, 123.9, 114.0, 73.1, 34.3, 31.9, 31.4, 29.7, 29.64, 29.60, 29.57, 29.5, 29.4, 26.8, 22.7, 14.1. HRMS (ESI-TOF)  $m/z$ :  $[M + Na]^+$  Calcd for  $C_{22}H_{30}N_2ONa$ , 361.2250; Found: 361.2256.

**1-(4-methylbenzyl)-3-undecylquinoxalin-2(1H)-one (5f)**

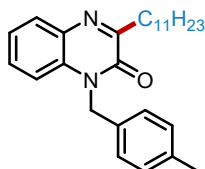

Purification by flash column chromatography (PE:EA, 40:1 v/v). White solid (57.4 mg, 71% yield), mp 42.5 – 44.5 °C.  $^1H$  NMR (400 MHz, Chloroform-*d*)  $\delta$  7.82 (dd,  $J$  = 8.0, 1.6 Hz, 1H), 7.42 – 7.34 (m, 1H), 7.30 – 7.24 (m, 2H), 7.15 – 7.09 (m, 4H), 5.45 (s, 2H), 3.04 – 2.95 (m, 2H), 2.30 (s, 3H), 1.87 – 1.78 (m, 2H), 1.47 – 1.24 (m, 16H), 0.90 – 0.86 (m, 3H).  $^{13}C$  NMR (101 MHz, Chloroform-*d*)  $\delta$  161.6, 155.0, 137.4, 133.0, 132.5, 132.4, 129.7, 129.6, 129.4, 126.9, 123.5, 114.4, 45.6, 34.4, 31.9, 29.68, 29.66, 29.6, 29.5, 29.4, 26.9, 22.7, 21.1, 14.1. HRMS (ESI-TOF)  $m/z$ :  $[M + Na]^+$  Calcd for  $C_{27}H_{36}N_2ONa$ , 427.2720; Found: 427.2723.

**1-(4-bromobenzyl)-3-undecylquinoxalin-2(1H)-one (5g)**

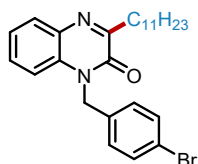

Purification by flash column chromatography (PE:EA, 40:1 v/v). Yellow oil (65.5 mg, 70% yield).  $^1H$  NMR (400 MHz, Chloroform-*d*)  $\delta$  7.87 (dd,  $J$  = 8.0, 1.6 Hz, 1H), 7.48 – 7.39 (m, 3H), 7.32 (td,  $J$  = 7.6, 1.3 Hz, 1H), 7.19 (dd,  $J$  = 8.4, 1.3 Hz, 1H), 7.14 (d,  $J$  = 8.5 Hz, 2H), 5.45 (s, 2H), 3.04 – 2.96 (m, 2H), 1.90 – 1.79 (m, 2H), 1.46 – 1.28 (m, 16H), 0.91 (d,  $J$  = 6.5 Hz, 3H).  $^{13}C$  NMR (101 MHz, Chloroform-*d*)  $\delta$  161.5, 154.9, 134.4, 133.0, 132.2, 132.1, 129.9, 129.6, 128.7, 123.7, 121.6, 114.1, 45.3, 34.4, 31.9, 29.7, 29.64, 29.63, 29.59, 29.5, 29.4, 26.9, 22.7, 14.1. HRMS (ESI-TOF)  $m/z$ :  $[M + H]^+$  Calcd for  $C_{26}H_{34}N_2OBr$ , 469.1849; Found: 469.1857.

**1-(4-fluorobenzyl)-3-undecylquinoxalin-2(1H)-one (5h)**

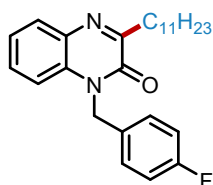

Purification by flash column chromatography (PE:EA, 40:1 v/v). Yellow oil (55.5 mg, 68% yield).  $^1\text{H}$  NMR (400 MHz, Chloroform-*d*)  $\delta$  7.86 (dd,  $J = 8.0, 1.6$  Hz, 1H), 7.45 – 7.41 (m, 1H), 7.32 (td,  $J = 7.7, 1.3$  Hz, 1H), 7.28 – 7.21 (m, 3H), 7.02 (t,  $J = 8.6$  Hz, 2H), 5.47 (s, 2H), 3.08 – 2.95 (m, 2H), 1.88 – 1.81 (m, 2H), 1.53 – 1.44 (m, 2H), 1.42 – 1.26 (m, 14H), 0.90 (t,  $J = 6.8$  Hz, 3H).  $^{13}\text{C}$  NMR (101 MHz, Chloroform-*d*)  $\delta$  162.2 (d,  $J = 246.4$  Hz), 161.5, 154.9, 133.0, 132.3, 131.2 (d,  $J = 3.3$  Hz), 129.9, 129.5, 128.7 (d,  $J = 8.1$  Hz), 123.7, 115.9 (d,  $J = 21.7$  Hz), 114.1, 45.2, 34.4, 31.9, 29.7, 29.64, 29.60, 29.5, 29.4, 26.9, 22.7, 14.1.  $^{19}\text{F}$  NMR (376 MHz, Chloroform-*d*)  $\delta$  -114.4. HRMS (ESI-TOF)  $m/z$ :  $[\text{M} + \text{Na}]^+$  Calcd for  $\text{C}_{26}\text{H}_{33}\text{N}_2\text{ONaF}$ , 431.2469; Found: 431.2473.

***ethyl 2-(2-oxo-3-undecylquinoxalin-1(2H)-yl)acetate (5i)***

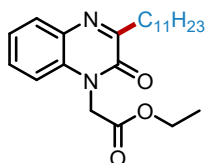

Purification by flash column chromatography (PE:EA, 40:1 v/v). White solid (56.3 mg, 73% yield), mp 64.5 – 66.5 °C.  $^1\text{H}$  NMR (400 MHz, Chloroform-*d*)  $\delta$  7.85 (dd,  $J = 8.1, 1.5$  Hz, 1H), 7.50 – 7.45 (m, 1H), 7.36 – 7.30 (m, 1H), 7.05 (d,  $J = 8.3$  Hz, 1H), 5.02 (s, 2H), 4.25 (q,  $J = 7.1$  Hz, 2H), 2.98 – 2.92 (m, 2H), 1.79 (p,  $J = 7.6$  Hz, 2H), 1.48 – 1.41 (m, 2H), 1.36 – 1.23 (m, 17H), 0.88 (t,  $J = 6.8$  Hz, 3H).  $^{13}\text{C}$  NMR (101 MHz, Chloroform-*d*)  $\delta$  167.2, 161.2, 154.5, 132.8, 132.2, 130.0, 129.6, 123.8, 113.0, 62.0, 43.5, 34.2, 31.9, 29.7, 29.62, 29.58, 29.56, 29.5, 29.3, 26.7, 22.7, 14.1. HRMS (ESI-TOF)  $m/z$ :  $[\text{M} + \text{Na}]^+$  Calcd for  $\text{C}_{23}\text{H}_{34}\text{N}_2\text{O}_3\text{Na}$ , 409.2462; Found: 409.2466.

***tert-butyl 2-(2-oxo-3-undecylquinoxalin-1(2H)-yl)acetate (5j)***

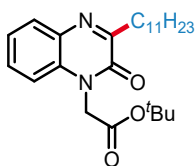

Purification by flash column chromatography (PE:EA, 40:1 v/v). White solid (56.3 mg, 68% yield), mp 52.5 – 54.5 °C. <sup>1</sup>H NMR (400 MHz, Chloroform-*d*) δ 7.85 (dd, *J* = 7.9, 1.6 Hz, 1H), 7.53 – 7.48 (m, 1H), 7.35 – 7.30 (m, 2H), 4.29 – 4.22 (m, 2H), 2.98 – 2.93 (m, 2H), 1.83 – 1.73 (m, 4H), 1.53 – 1.40 (m, 4H), 1.43 – 1.19 (m, 16H), 1.02 (t, *J* = 7.4 Hz, 3H), 0.92 – 0.88 (m, 3H). <sup>13</sup>C NMR (101 MHz, Chloroform-*d*) δ 161.5, 154.6, 133.0, 132.3, 129.9, 129.4, 123.3, 113.6, 42.1, 34.3, 31.9, 29.7, 29.63, 29.58, 29.5, 29.4, 29.3, 26.9, 22.7, 20.3, 14.1, 13.8. HRMS (ESI-TOF) *m/z*: [M + Na]<sup>+</sup> Calcd for C<sub>25</sub>H<sub>38</sub>N<sub>2</sub>O<sub>3</sub>Na, 437.2775; Found: 437.2778.

**6-chloro-1-methyl-3-undecylquinoxalin-2(1H)-one (5k)**

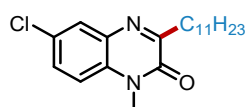

Purification by flash column chromatography (PE:EA, 40:1 v/v). Yellow solid (49.4 mg, 71% yield), mp 32.1 – 34.1 °C. <sup>1</sup>H NMR (400 MHz, Chloroform-*d*) δ 7.78 – 7.73 (m, 1H), 3.67 (s, 3H), 2.98 – 2.88 (m, 2H), 1.81 – 1.76 (m, 2H), 1.28 (d, *J* = 6.8 Hz, 16H), 0.90 (d, *J* = 6.5 Hz, 3H). <sup>13</sup>C NMR (101 MHz, Chloroform-*d*) δ 161.5, 154.6, 135.3, 134.0, 131.2, 130.7, 123.9, 113.6, 34.3, 31.9, 29.7, 29.62, 29.60, 29.56, 29.5, 29.3, 29.2, 26.7, 22.7, 14.1. HRMS (ESI-TOF) *m/z*: [M + H]<sup>+</sup> Calcd for C<sub>20</sub>H<sub>30</sub>N<sub>2</sub>OCl, 349.2041; Found: 349.2038.

**1-methyl-2-oxo-3-undecyl-1,2-dihydroquinoxaline-6-carbonitrile (5l)**

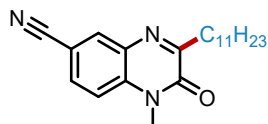

Purification by flash column chromatography (PE:EA, 50:1 v/v). White solid (44.1 mg, 65% yield), mp 56.5 – 58.5 °C. <sup>1</sup>H NMR (400 MHz, Chloroform-*d*) δ 8.14 (d, *J* = 2.0 Hz, 1H), 7.76 (dd, *J* = 8.7, 1.9 Hz, 1H), 7.38 (d, *J* = 8.7 Hz, 1H), 3.72 (s, 3H), 2.97 – 2.93 (m, 2H), 1.82 – 1.75 (m, 2H), 1.42 – 1.26 (m, 16H), 0.91 – 0.87 (m, 3H). <sup>13</sup>C NMR (101 MHz, Chloroform-*d*) δ 163.7, 154.5, 136.4, 133.9, 132.3, 132.1, 118.1, 114.7, 107.0, 34.2, 31.9, 29.64, 29.61, 29.54, 29.46, 29.4, 29.3, 29.3, 26.4, 22.7, 14.1. HRMS (ESI-TOF) *m/z*: [M + H]<sup>+</sup> Calcd for C<sub>21</sub>H<sub>30</sub>N<sub>3</sub>O, 340.2383; Found: 340.2392.

**6,7-dichloro-1-methyl-3-undecylquinoxalin-2(1H)-one (5m)**

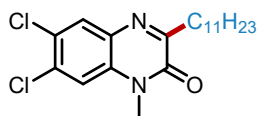

Purification by flash column chromatography (PE:EA, 40:1 v/v). White solid (50.4 mg, 66% yield), mp 46.2–48.2 °C. <sup>1</sup>H NMR (400 MHz, Chloroform-*d*) δ 7.94 (s, 1H), 7.40 (s, 1H), 3.67 (s, 3H), 2.96 – 2.90 (m, 2H), 1.81 – 1.74 (m, 2H), 1.35 – 1.27 (m, 16H), 0.93 – 0.87 (m, 3H). <sup>13</sup>C NMR (101 MHz, Chloroform-*d*) δ 163.2, 156.3, 133.3, 129.7, 129.4, 129.3, 128.3, 116.6, 33.5, 31.9, 29.70, 29.67, 29.65, 29.6, 29.49, 29.47, 29.4, 26.6, 22.7, 14.1. HRMS (ESI-TOF) *m/z*: [M + H]<sup>+</sup> Calcd for C<sub>20</sub>H<sub>29</sub>N<sub>2</sub>OCl<sub>2</sub>, 383.1651; Found: 383.1659.

### ***3-undecylquinoxalin-2(1H)-one (5n)***

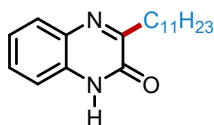

Purification by flash column chromatography (PE:EA, 30:1 v/v). White solid (42.1 mg, 70% yield). <sup>1</sup>H NMR (400 MHz, Chloroform-*d*) δ 12.22 (s, 1H), 7.88 – 7.82 (m, 1H), 7.53 – 7.48 (m, 1H), 7.38 – 7.33 (m, 2H), 3.03 – 2.98 (m, 2H), 1.89 – 1.82 (m, 2H), 1.47 – 1.27 (m, 16H), 0.92 – 0.88 (m, 3H). <sup>13</sup>C NMR (101 MHz, Chloroform-*d*) δ 161.9, 156.6, 132.9, 130.9, 129.6, 128.7, 124.1, 115.6, 33.6, 31.9, 29.7, 29.64, 29.58, 29.5, 29.4, 26.9, 22.7, 14.1.

### ***6-chloro-3-undecylquinoxalin-2(1H)-one (5o)***

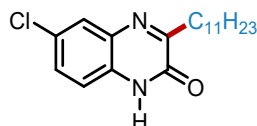

Purification by flash column chromatography (PE:EA, 40:1 v/v). White solid (47.4 mg, 71% yield), mp 74.5 – 76.5 °C. <sup>1</sup>H NMR (400 MHz, Chloroform-*d*) δ 12.09 (s, 1H), 7.86 (d, *J* = 2.3 Hz, 1H), 7.46 (dd, *J* = 8.7, 2.3 Hz, 1H), 7.30 – 7.27 (m, 1H), 3.00 – 2.96 (m, 2H), 1.83 (m, 2H), 1.35 – 1.27 (m, 16H), 0.90 (t, *J* = 6.7 Hz, 3H). <sup>13</sup>C NMR (101 MHz, Chloroform-*d*) δ 163.2, 156.3, 133.3, 129.7, 129.4, 129.3, 128.3, 116.6, 33.5, 31.9, 29.70, 29.67, 29.65, 29.6, 29.49, 29.47, 29.4, 26.6, 22.7, 14.1. HRMS (ESI-TOF) *m/z*: [M + H]<sup>+</sup> Calcd for C<sub>19</sub>H<sub>28</sub>N<sub>2</sub>OCl, 335.1885; Found: 335.1890.

### ***1-methyl-3-(3,3,3-trifluoropropyl)quinoxalin-2(1H)-one (5p)<sup>6</sup>***

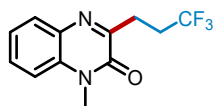

Purification by flash column chromatography (PE:EA, 30:1 v/v). White solid (28.1 mg, 55% yield).  $^1\text{H}$  NMR (400 MHz, Chloroform-*d*)  $\delta$  7.85 (dd,  $J = 8.0, 1.5$  Hz, 1H), 7.60 – 7.56 (m, 1H), 7.42 – 7.31 (m, 2H), 3.73 (s, 3H), 3.27 – 3.20 (m, 2H), 2.77 – 2.65 (m, 2H).  $^{13}\text{C}$  NMR (101 MHz, Chloroform-*d*)  $\delta$  154.6, 133.1, 132.5, 130.1, 129.9, 127.2 (q,  $J = 276.2$  Hz), 123.7, 113.7, 30.2 (q,  $J = 29.5$  Hz), 29.0, 26.6 (q,  $J = 2.6$  Hz).  $^{19}\text{F}$  NMR (376 MHz, Chloroform-*d*)  $\delta$  -66.30.

***1-methyl-3-phenethylquinoxalin-2(1H)-one (5q)***

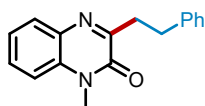

Purification by flash column chromatography (PE:EA, 30:1 v/v). Yellow solid (34.3 mg, 65% yield), mp 68.5 – 70.5 °C.  $^1\text{H}$  NMR (400 MHz, Chloroform-*d*)  $\delta$  7.88 (dd,  $J = 8.0, 1.6$  Hz, 1H), 7.57 – 7.53 (m, 1H), 7.40 – 7.30 (m, 6H), 7.25 – 7.21 (m, 1H), 3.73 (s, 3H), 3.34 – 3.27 (m, 2H), 3.17 (dd,  $J = 9.6, 6.4$  Hz, 2H).  $^{13}\text{C}$  NMR (101 MHz, Chloroform-*d*)  $\delta$  160.1, 154.9, 141.7, 133.1, 132.7, 129.7, 128.6, 128.4, 126.0, 123.6, 113.6, 36.0, 32.5, 29.1. HRMS (ESI-TOF)  $m/z$ :  $[\text{M} + \text{Na}]^+$  Calcd for  $\text{C}_{17}\text{H}_{16}\text{N}_2\text{ONa}$ , 287.1160; Found: 287.1154.

***1-methyl-3-(3-(thiophen-2-yl)propyl)quinoxalin-2(1H)-one (5r)***

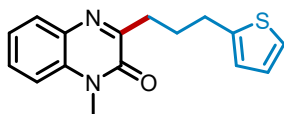

Purification by flash column chromatography (PE:EA, 30:1 v/v). White solid (36.9 mg, 62% yield), mp 130.5 – 132.5 °C.  $^1\text{H}$  NMR (400 MHz, Chloroform-*d*)  $\delta$  7.85 (dd,  $J = 8.1, 1.5$  Hz, 1H), 7.57-7.53 (m, 1H), 7.39 – 7.30 (m, 2H), 7.12 (dd,  $J = 5.1, 1.2$  Hz, 1H), 6.93 (dd,  $J = 5.2, 3.4$  Hz, 1H), 6.86 (dd,  $J = 3.3, 1.3$  Hz, 1H), 3.72 (s, 3H), 3.03 (dt,  $J = 13.6, 7.6$  Hz, 4H), 2.27 – 2.19 (m, 2H).  $^{13}\text{C}$  NMR (101 MHz, Chloroform-*d*)  $\delta$  154.9, 145.0, 133.1, 132.7, 129.72, 129.65, 126.7, 124.3, 123.6, 123.0, 113.6, 33.6, 29.7, 29.0, 28.5. HRMS (ESI-TOF)  $m/z$ :  $[\text{M} + \text{Na}]^+$  Calcd for  $\text{C}_{16}\text{H}_{16}\text{N}_2\text{ONaS}$ , 307.0881; Found: 307.0879.



**3-heptyl-1-methylquinoxalin-2(1H)-one (5s)**

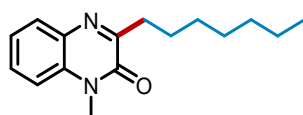

Purification by flash column chromatography (PE:EA, 30:1 v/v). Yellow oil (36.1 mg, 70% yield).  $^1\text{H}$  NMR (400 MHz, Chloroform-*d*)  $\delta$  7.85 (dd,  $J = 8.0, 1.5$  Hz, 1H), 7.56 – 7.52 (m, 1H), 7.39 – 7.29 (m, 2H), 3.72 (s, 3H), 3.01 – 2.92 (m, 2H), 1.83 – 1.76 (m, 2H), 1.47 – 1.28 (m, 8H), 0.94 – 0.87 (m, 3H).  $^{13}\text{C}$  NMR (101 MHz, Chloroform-*d*)  $\delta$  161.4, 154.9, 133.1, 132.8, 129.6, 129.5, 123.5, 113.5, 34.4, 31.8, 29.6, 29.2, 29.0, 26.9, 22.6, 14.1. HRMS (ESI-TOF)  $m/z$ :  $[\text{M} + \text{Na}]^+$  Calcd for  $\text{C}_{16}\text{H}_{22}\text{N}_2\text{ONa}$ , 281.1630; Found: 281.1625.

**3-(((1*r*,3*r*,5*r*,7*r*)-adamantan-2-yl)methyl)-1-methylquinoxalin-2(1H)-one (5t)**

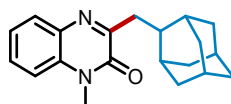

Purification by flash column chromatography (PE:EA, 30:1 v/v). White solid (32.6 mg, 53% yield) mp 101.5 – 103.5 °C.  $^1\text{H}$  NMR (400 MHz, Chloroform-*d*)  $\delta$  7.88 (s, 1H), 7.55 (t,  $J = 7.9$  Hz, 1H), 7.38 – 7.30 (m, 2H), 3.72 (s, 3H), 2.81 (s, 2H), 1.99 – 1.95 (m, 3H), 1.71 – 1.65 (m, 12H).  $^{13}\text{C}$  NMR (101 MHz, Chloroform-*d*)  $\delta$  159.6, 133.2, 132.6, 129.8, 129.6, 123.4, 113.5, 46.6, 42.7, 36.9, 35.6, 29.3, 28.9. HRMS (ESI-TOF)  $m/z$ :  $[\text{M} + \text{Na}]^+$  Calcd for  $\text{C}_{20}\text{H}_{24}\text{N}_2\text{ONa}$ , 331.1786; Found: 331.1785.

**3-cyclohexyl-1-methylquinoxalin-2(1H)-one (5u)<sup>7</sup>**

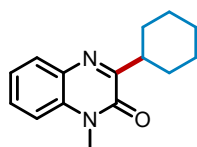

Purification by flash column chromatography (PE:EA, 30:1 v/v). Colorless oil (29.0 mg, 60% yield).  $^1\text{H}$  NMR (400 MHz, Chloroform-*d*)  $\delta$  7.86 (dd,  $J = 8.0, 1.5$  Hz, 1H), 7.55 – 7.51 (m, 1H), 7.37 – 7.29 (m, 2H), 3.72 (s, 3H), 3.40 – 3.33 (m, 1H), 2.01 – 1.95 (m, 2H), 1.89 (dt,  $J = 12.8, 3.3$  Hz, 2H), 1.81 – 1.76 (m, 1H), 1.62 – 1.46 (m, 4H), 1.33 (dt,  $J = 12.4, 3.6$  Hz, 1H).  $^{13}\text{C}$  NMR (101 MHz, Chloroform-*d*)  $\delta$  164.3, 154.6, 132.9, 132.9, 129.8, 129.4, 123.4, 113.4, 40.8, 30.5, 29.0, 26.3, 26.2.

**3-methoxy-2-(3-(2-oxo-3-undecylquinoxalin-1(2H)-yl)propoxy)benzaldehyde (5v)**

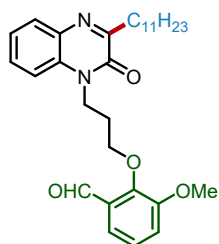

Purification by flash column chromatography (PE:EA, 40:1 v/v). Colorless oil (52.9 mg, 50% yield).  $^1\text{H}$  NMR (400 MHz, Chloroform-*d*)  $\delta$  10.52 (s, 1H), 7.97 (dd,  $J = 8.2, 1.5$  Hz, 1H), 7.83 (dd,  $J = 8.3, 1.4$  Hz, 1H), 7.64 – 7.59 (m, 1H), 7.57 – 7.53 (m, 1H), 7.45 (t,  $J = 4.7$  Hz, 1H), 7.16 (d,  $J = 4.6$  Hz, 2H), 4.78 (t,  $J = 6.2$  Hz, 2H), 4.38 (t,  $J = 6.2$  Hz, 2H), 3.85 (s, 3H), 3.00 – 2.95 (m, 2H), 2.44 – 2.38 (m, 2H), 1.80 (t,  $J = 7.6$  Hz, 2H), 1.42 – 1.27 (m, 16H), 0.90 (s, 3H).  $^{13}\text{C}$  NMR (101 MHz, Chloroform-*d*)  $\delta$  190.0, 155.9, 153.0, 151.7, 151.5, 139.8, 138.6, 130.0, 128.8, 128.2, 126.8, 126.3, 124.1, 119.4, 118.1, 71.7, 63.0, 56.0, 33.7, 31.9, 29.7, 29.6, 29.54, 29.46, 29.3, 27.5, 22.7, 14.1. HRMS (ESI-TOF)  $m/z$ :  $[\text{M} + \text{Na}]^+$  Calcd for  $\text{C}_{30}\text{H}_{40}\text{N}_2\text{O}_4\text{Na}$ , 515.2880; Found: 515.2884.

**1-(4-(((1R,2R,5S)-2-isopropyl-5-methylcyclohexyl)oxy)methyl)benzyl)-3-undecylquinoxalin-2(1H)-one (5w)**

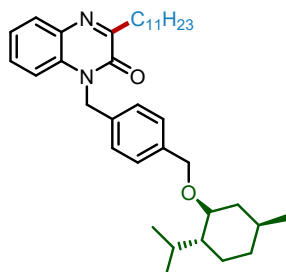

Purification by flash column chromatography (PE:EA, 40:1 v/v). White solid (61.4 mg, 55% yield), mp 41.8 – 43.8 °C.  $^1\text{H}$  NMR (400 MHz, Chloroform-*d*)  $\delta$  7.85 (d,  $J = 7.9$  Hz, 1H), 7.39 (t,  $J = 7.8$  Hz, 1H), 7.30 (d,  $J = 16.6$  Hz, 3H), 7.23 (d,  $J = 8.0$  Hz, 3H), 5.51 (s, 2H), 4.63 (d,  $J = 11.5$  Hz, 1H), 4.36 (d,  $J = 11.5$  Hz, 1H), 3.16 (td,  $J = 10.6, 4.1$  Hz, 1H), 3.02 (t,  $J = 7.8$  Hz, 2H), 2.32 – 2.24 (m, 1H), 2.18 (d,  $J = 12.4$  Hz, 1H), 1.89 – 1.81 (m, 2H), 1.68 (s, 3H), 1.48 (q,  $J = 7.4$  Hz, 2H), 1.34 – 1.24 (m, 15H), 0.92 (dd,  $J = 19.3, 7.3$  Hz, 12H), 0.69 (d,  $J = 6.9$  Hz, 3H).  $^{13}\text{C}$  NMR (101 MHz, Chloroform-*d*)  $\delta$  161.5, 155.0, 138.7, 134.5, 133.0, 132.4, 129.7, 129.4, 128.4, 126.9, 123.5, 114.4, 70.0, 48.3, 45.7, 40.3, 34.6, 34.4, 31.9, 31.6, 29.70, 29.66,

29.64, 29.59, 29.5, 29.4, 26.9, 25.5, 23.2, 22.7, 22.3, 21.0, 16.0, 14.1. HRMS (ESI-TOF)  $m/z$ :  $[M + H]^+$  Calcd for  $C_{37}H_{55}N_2O_2$ , 559.4258; Found: 559.4264.

**3-methoxy-4-(3-(2-oxo-3-undecylquinoxalin-1(2H)-yl)propoxy)benzaldehyde (5x)**

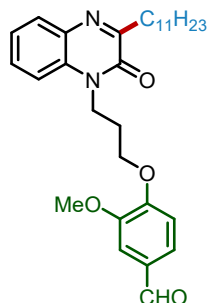

Purification by flash column chromatography (PE:EA, 40:1 v/v). White solid (44.3 mg, 45% yield), mp 56.2 – 58.2 °C. <sup>1</sup>H NMR (400 MHz, Chloroform-*d*) δ 10.52 (s, 1H), 7.97 (dd,  $J = 8.2, 1.5$  Hz, 1H), 7.83 (dd,  $J = 8.3, 1.4$  Hz, 1H), 7.64 – 7.59 (m, 1H), 7.57 – 7.53 (m, 1H), 7.45 (t,  $J = 4.7$  Hz, 1H), 7.16 (d,  $J = 4.6$  Hz, 2H), 4.78 (t,  $J = 6.2$  Hz, 2H), 4.38 (t,  $J = 6.2$  Hz, 2H), 3.85 (s, 3H), 3.00 – 2.95 (m, 2H), 2.44 – 2.38 (m, 2H), 1.80 (t,  $J = 7.61$  Hz, 2H), 1.42 – 1.27 (m, 16H), 0.90 (s, 3H). <sup>13</sup>C NMR (101 MHz, Chloroform-*d*) δ 190.8, 155.8, 153.9, 151.4, 150.0, 139.7, 138.7, 130.2, 128.8, 128.2, 126.7, 126.6, 126.4, 111.5, 109.4, 66.0, 62.9, 56.0, 33.7, 31.9, 29.65, 29.62, 29.56, 29.5, 29.4, 29.3, 28.7, 27.6, 22.7, 14.1. HRMS (ESI-TOF)  $m/z$ :  $[M + Na]^+$  Calcd for  $C_{30}H_{40}N_2O_4Na$ , 515.2880; Found: 515.2880.

**2-(2-oxo-3-phenethylquinoxalin-1(2H)-yl)acetic acid (5y)<sup>8</sup>**

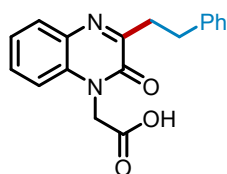

Purify by flash column chromatography (CH<sub>2</sub>Cl<sub>2</sub>:MeOH, 40:2 v/v). Yellow solid (24.1 mg, 40% yield), <sup>1</sup>H NMR (400 MHz, DMSO-*d*<sub>6</sub>) δ 7.83 (dd,  $J = 8.0, 1.5$  Hz, 1H), 7.58 (td,  $J = 7.8, 7.2, 1.5$  Hz, 1H), 7.48 (d,  $J = 8.4$  Hz, 1H), 7.38 (t,  $J = 7.6$  Hz, 1H), 7.29 (q,  $J = 4.3, 3.3$  Hz, 4H), 7.20 – 7.16 (m, 1H), 5.02 (s, 2H), 3.17 – 3.12 (m, 2H), 3.08 – 3.04 (m, 2H). <sup>13</sup>C NMR (101 MHz, DMSO-*d*<sub>6</sub>) δ 169.3, 159.5, 154.3, 141.9, 132.8, 132.3, 130.4, 129.5, 128.9, 128.8, 126.4, 124.0, 115.0, 44.1, 35.6, 32.0.

### **2-undecylquinoxaline (7a)**

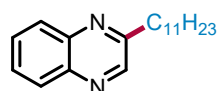

Purification by flash column chromatography (PE:EA, 50:1 v/v), Colorless oil (34.1 mg, 60% yield),  $^1\text{H}$  NMR (400 MHz, Chloroform-*d*)  $\delta$  8.76 (s, 1H), 8.11 – 8.05 (m, 2H), 7.79 – 7.70 (m, 2H), 3.07 – 3.00 (m, 2H), 1.91 – 1.82 (m, 2H), 1.47 – 1.26 (m, 16H), 0.89 (t,  $J = 6.8$  Hz, 3H).  $^{13}\text{C}$  NMR (101 MHz, Chloroform-*d*)  $\delta$  157.7, 145.9, 142.2, 141.2, 129.9, 129.2, 128.9, 36.6, 31.9, 29.61, 29.60, 29.57, 29.51, 29.46, 29.4, 29.3, 22.7, 14.1. HRMS (ESI-TOF)  $m/z$ :  $[\text{M} + \text{H}]^+$  Calcd for  $\text{C}_{19}\text{H}_{29}\text{N}_2$ , 285.2325; Found: 285.2336.

### **2-methyl-3-undecylquinoxaline (7b)**

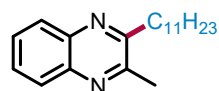

Purification by flash column chromatography (PE:EA, 50:1 v/v), Yellow liquid (26.8 mg, 45% yield),  $^1\text{H}$  NMR (400 MHz, Chloroform-*d*)  $\delta$  8.03 – 7.98 (m, 2H), 7.67 (dd,  $J = 6.4, 3.4$  Hz, 2H), 3.04 – 2.97 (m, 2H), 2.78 (s, 3H), 1.87 – 1.80 (m, 2H), 1.43 – 1.28 (m, 16H), 0.89 (t,  $J = 6.7$  Hz, 3H).  $^{13}\text{C}$  NMR (101 MHz, Chloroform-*d*)  $\delta$  157.0, 153.1, 141.2, 140.9, 128.8, 128.7, 128.5, 128.3, 36.0, 31.9, 29.7, 29.64, 29.62, 29.57, 29.5, 29.3, 28.2, 22.8, 22.7, 14.1. HRMS (ESI-TOF)  $m/z$ :  $[\text{M} + \text{H}]^+$  Calcd for  $\text{C}_{20}\text{H}_{31}\text{N}_2$ , 299.2487; Found: 299.2487.

### **6-methyl-3-undecyl-2H-benzo[b][1,4]oxazin-2-one (7c)**

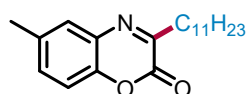

Purification by flash column chromatography (PE:EA, 50:1 v/v). Yellow liquid (34.6 mg, 55% yield),  $^1\text{H}$  NMR (400 MHz, Chloroform-*d*)  $\delta$  7.55 (d,  $J = 2.1$  Hz, 1H), 7.29 – 7.26 (m, 1H), 7.18 (d,  $J = 8.4$  Hz, 1H), 2.93 – 2.87 (m, 2H), 2.45 (s, 3H), 1.83 – 1.75 (m, 2H), 1.46 – 1.28 (m, 16H), 0.90 (t,  $J = 6.7$  Hz, 3H).  $^{13}\text{C}$  NMR (101 MHz, Chloroform-*d*)  $\delta$  157.0, 153.1, 141.2, 140.9, 128.8, 128.7, 128.5, 128.3, 36.0, 31.9, 29.7, 29.64, 29.62, 29.57, 29.5, 29.3, 28.2, 22.8, 22.7, 14.1. HRMS (ESI-TOF)  $m/z$ :  $[\text{M} + \text{H}]^+$  Calcd for  $\text{C}_{20}\text{H}_{30}\text{NO}_2$ , 316.2271; Found: 316.2273.

### **methyl 3-(6-methyl-2-oxo-2H-benzo[b][1,4]oxazin-3-yl)propanoate (7d)<sup>9</sup>**

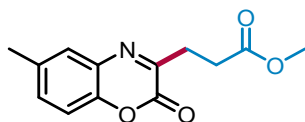

Purification by flash column chromatography (PE:EA, 50:1 v/v). White solid (22.2 mg, 40% yield). mp 380.5 – 382.5 °C, <sup>1</sup>H NMR (400 MHz, Chloroform-*d*) δ 7.53 – 7.49 (m, 1H), 7.30 – 7.26 (m, 1H), 7.17 (d, *J* = 8.4 Hz, 1H), 3.72 (s, 3H), 3.23 (t, *J* = 6.9 Hz, 2H), 2.87 (t, *J* = 6.9 Hz, 2H), 2.43 (s, 3H). <sup>13</sup>C NMR (101 MHz, Chloroform-*d*) δ 172.9, 155.6, 153.1, 144.3, 135.3, 131.6, 130.7, 128.8, 115.9, 51.8, 29.5, 28.5, 20.8.

**2,4-dibenzyl-6-(but-3-en-1-yl)-1,2,4-triazine-3,5(2H,4H)-dione (9)**

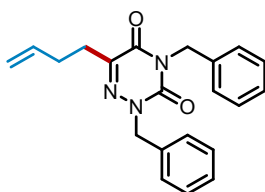

Purification by flash column chromatography (PE:EA, 60:1 v/v). Colorless oil (43.1 mg, 62% yield). <sup>1</sup>H NMR (400 MHz, Chloroform-*d*) δ 7.55 – 7.47 (m, 2H), 7.45 – 7.30 (m, 8H), 5.86 – 5.76 (m, 1H), 5.11 (d, *J* = 2.4 Hz, 4H), 5.09 – 4.97 (m, 2H), 2.75 (dd, *J* = 8.4, 6.7 Hz, 2H), 2.51 – 2.31 (m, 2H). <sup>13</sup>C NMR (101 MHz, Chloroform-*d*) δ 156.0, 149.0, 144.9, 137.0, 135.8, 135.7, 129.4, 128.7, 128.6, 128.2, 128.0, 115.7, 55.2, 44.2, 30.1, 29.6. HRMS (ESI-TOF) *m/z*: [M + Na]<sup>+</sup> Calcd for C<sub>21</sub>H<sub>21</sub>N<sub>3</sub>O<sub>2</sub>Na 370.1526; Found: 370.1528.

**3-(but-3-en-1-yl)-1-methylquinoxalin-2(1H)-one (10)<sup>10</sup>**

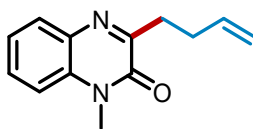

Purification by flash column chromatography (PE:EA, 30:1 v/v). White solid (26.1 mg, 61% yield), mp 45.5 – 48.5 °C. <sup>1</sup>H NMR (400 MHz, Chloroform-*d*) δ 7.84 (dd, *J* = 8.0, 1.5 Hz, 1H), 7.56-7.52 (m, 1H), 7.39 – 7.29 (m, 2H), 6.03 – 5.92 (m, 1H), 5.13 (dd, *J* = 17.1, 1.7 Hz, 1H), 5.01 (dt, *J* = 10.4, 1.6 Hz, 1H), 3.71 (s, 3H), 3.11 – 3.02 (m, 2H), 2.62 – 2.57 (m, 2H). <sup>13</sup>C NMR (101 MHz, Chloroform-*d*) δ 160.3, 154.9, 137.8, 133.1, 132.7, 129.7, 129.6, 123.6, 115.2, 113.6, 33.5, 30.6, 29.0.

## 4. NMR Copies of Products

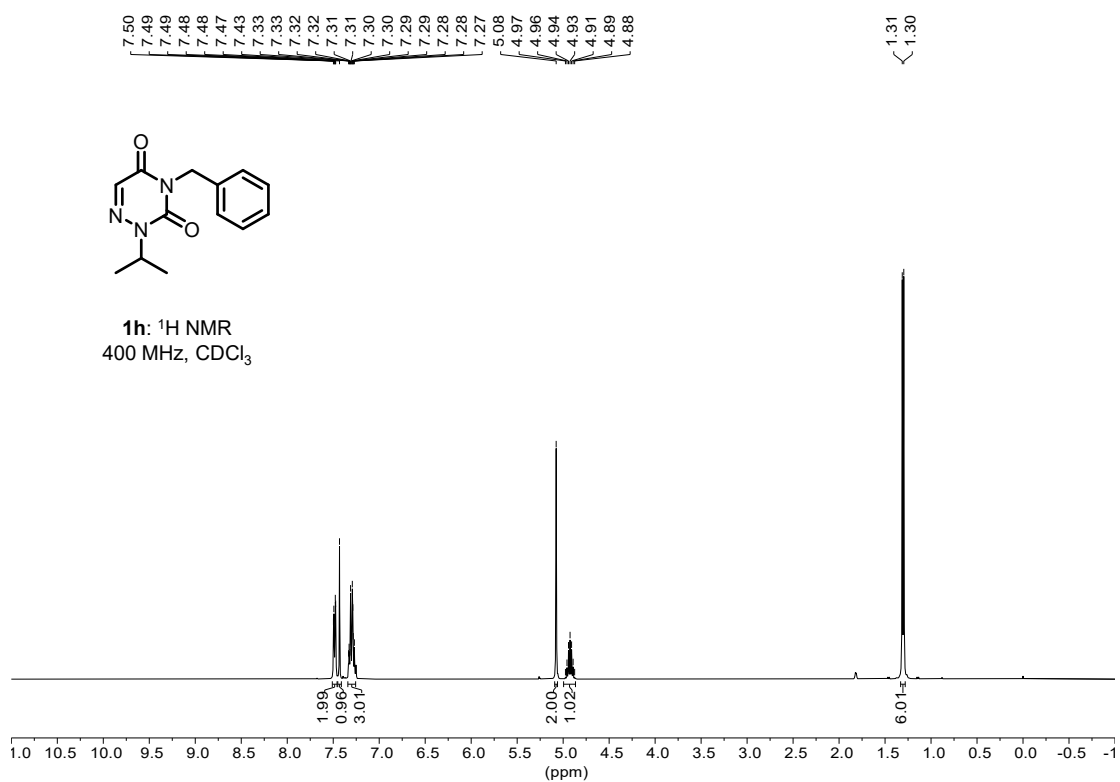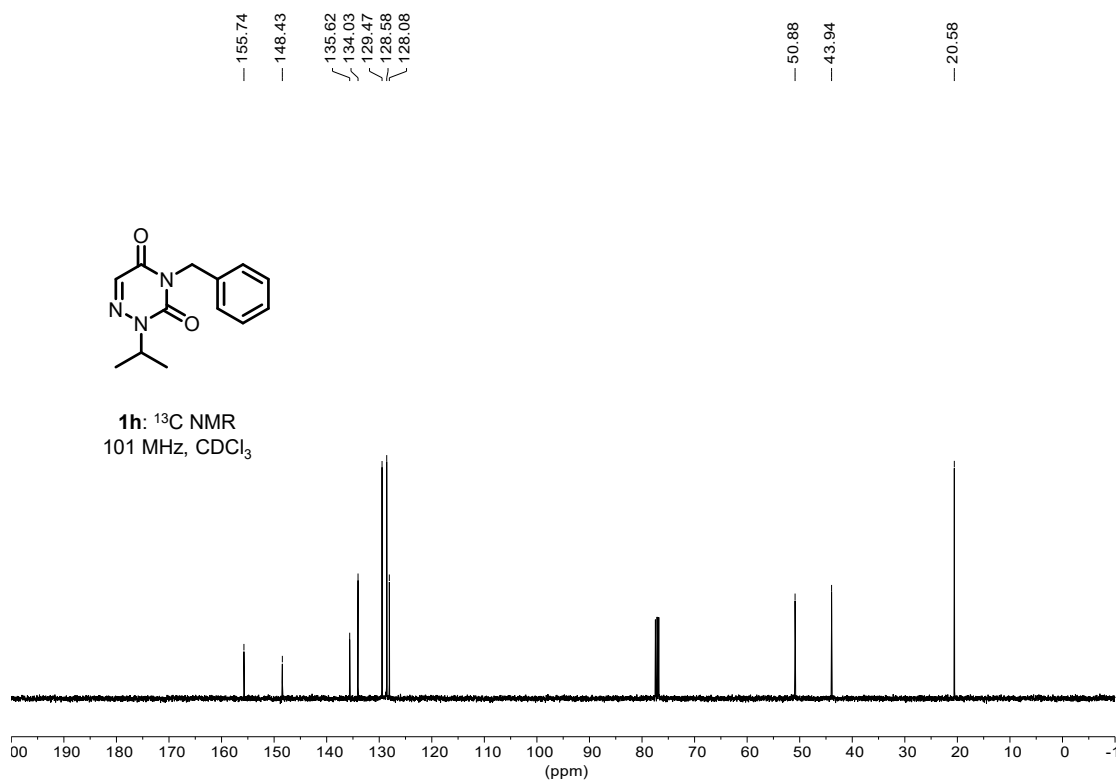

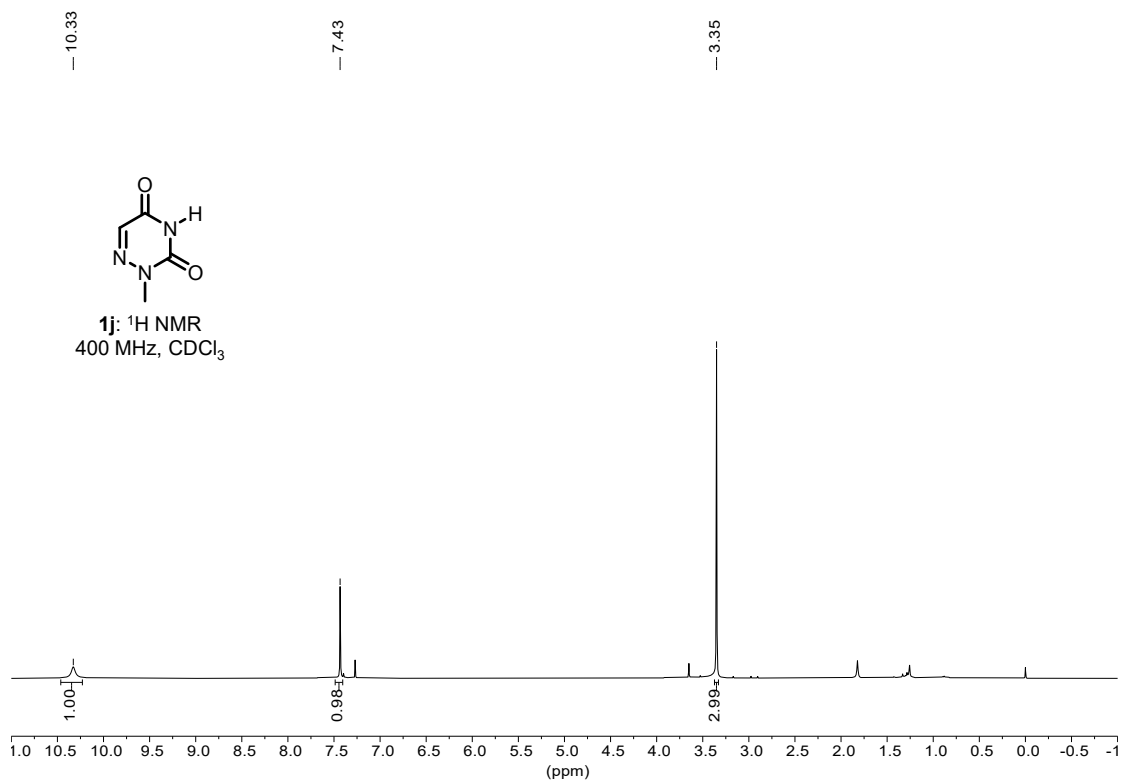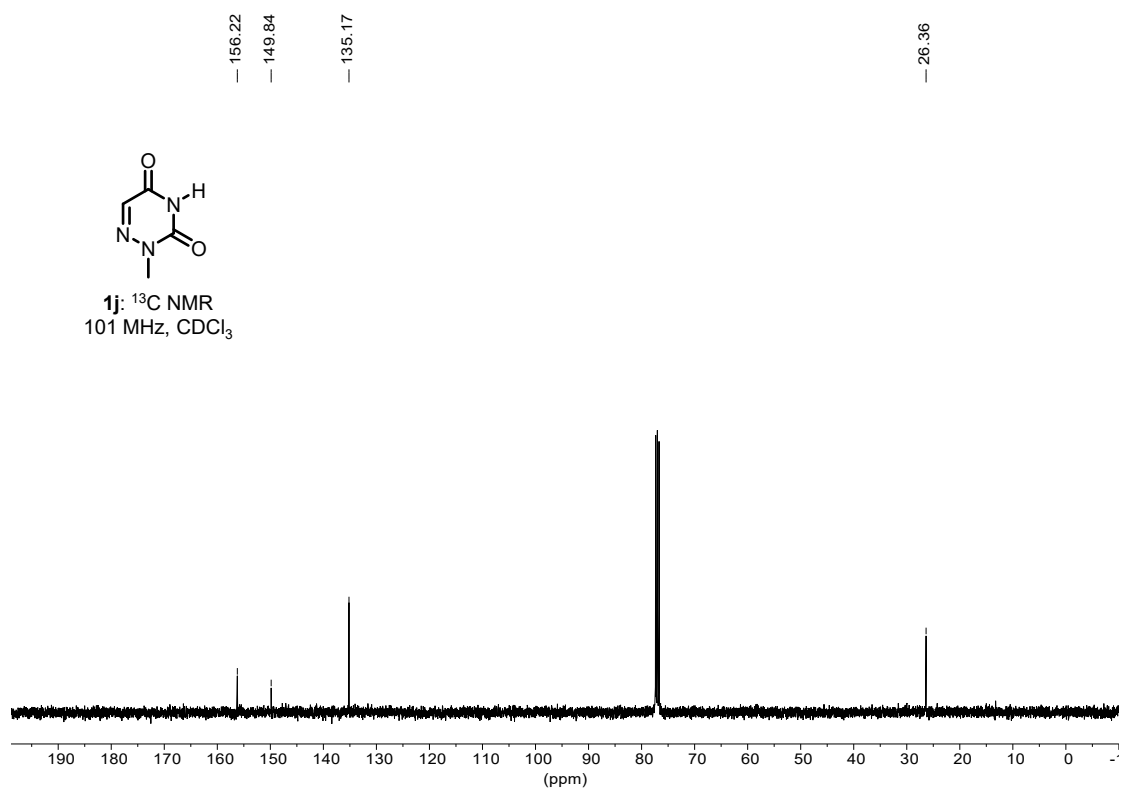

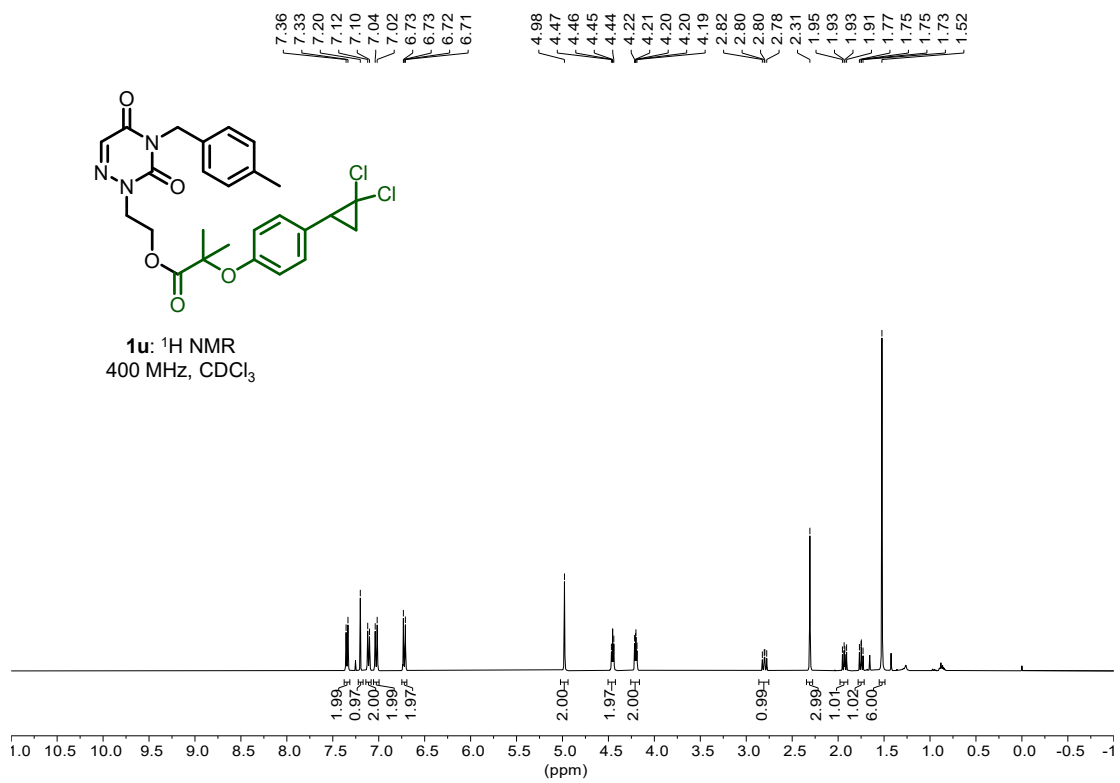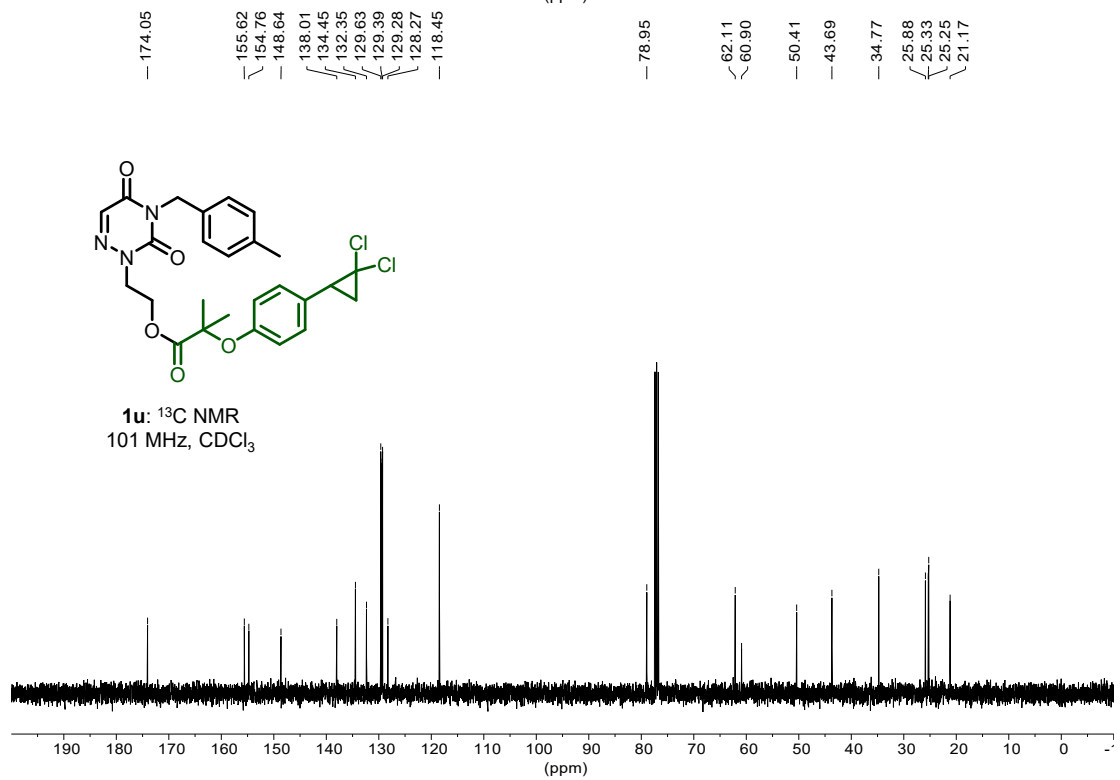



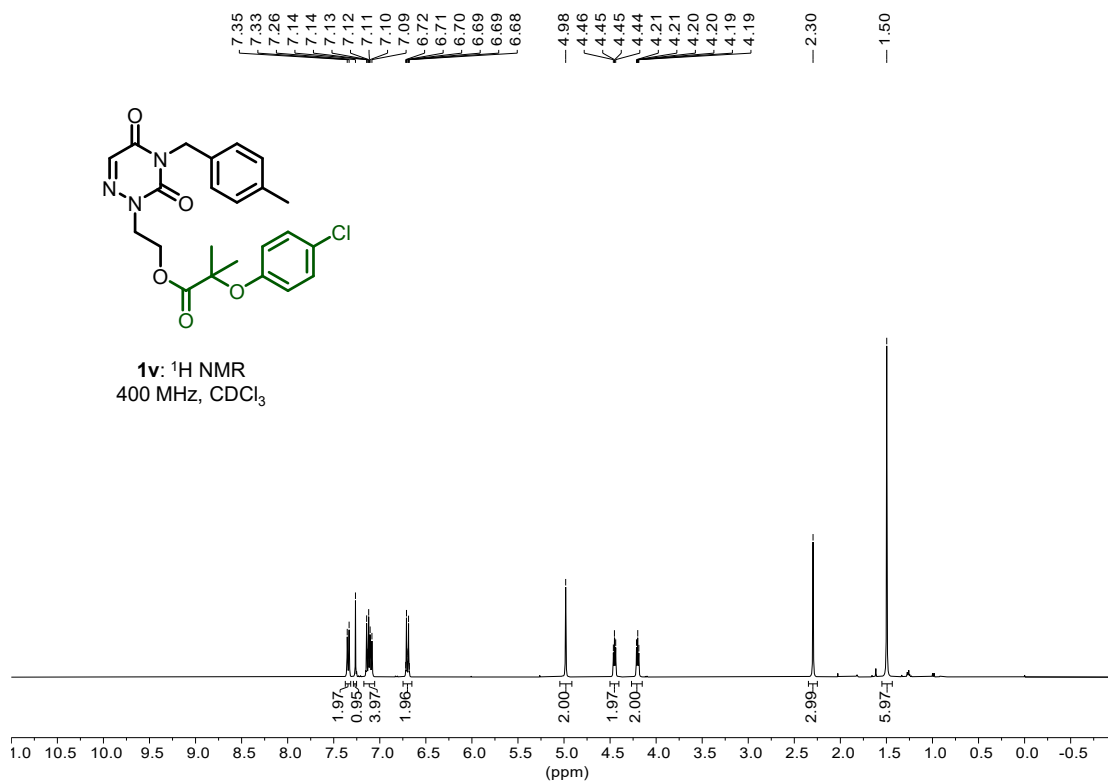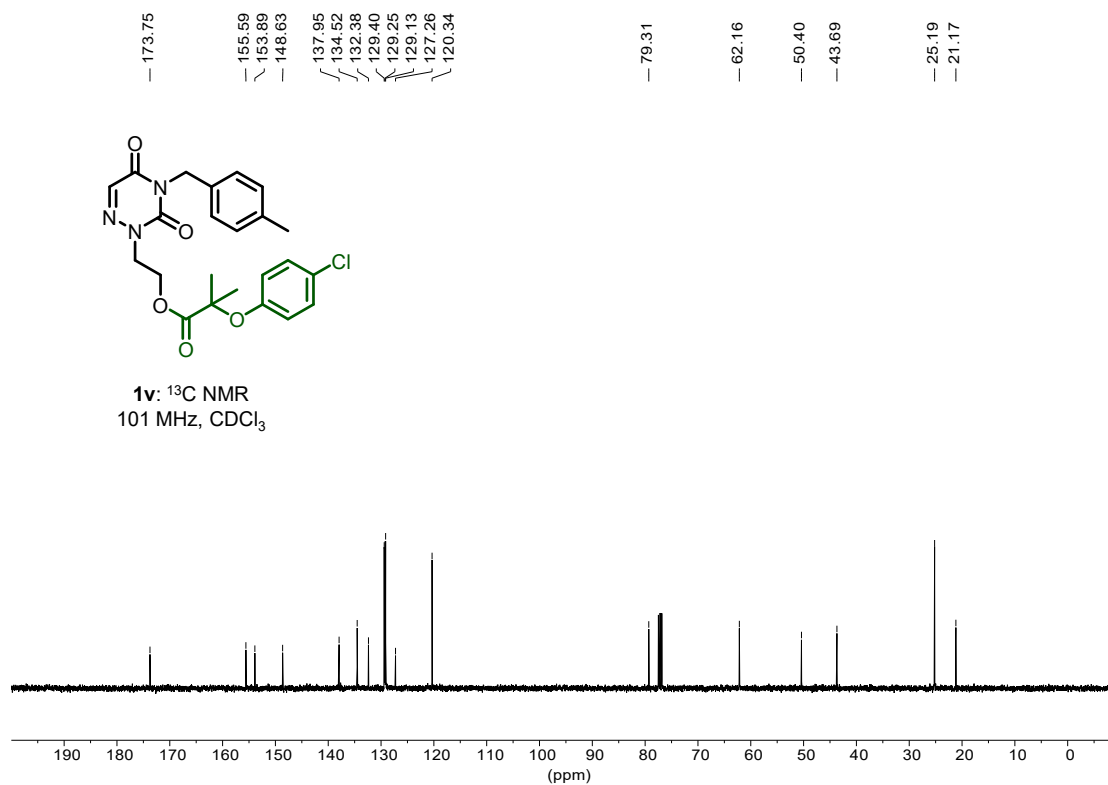

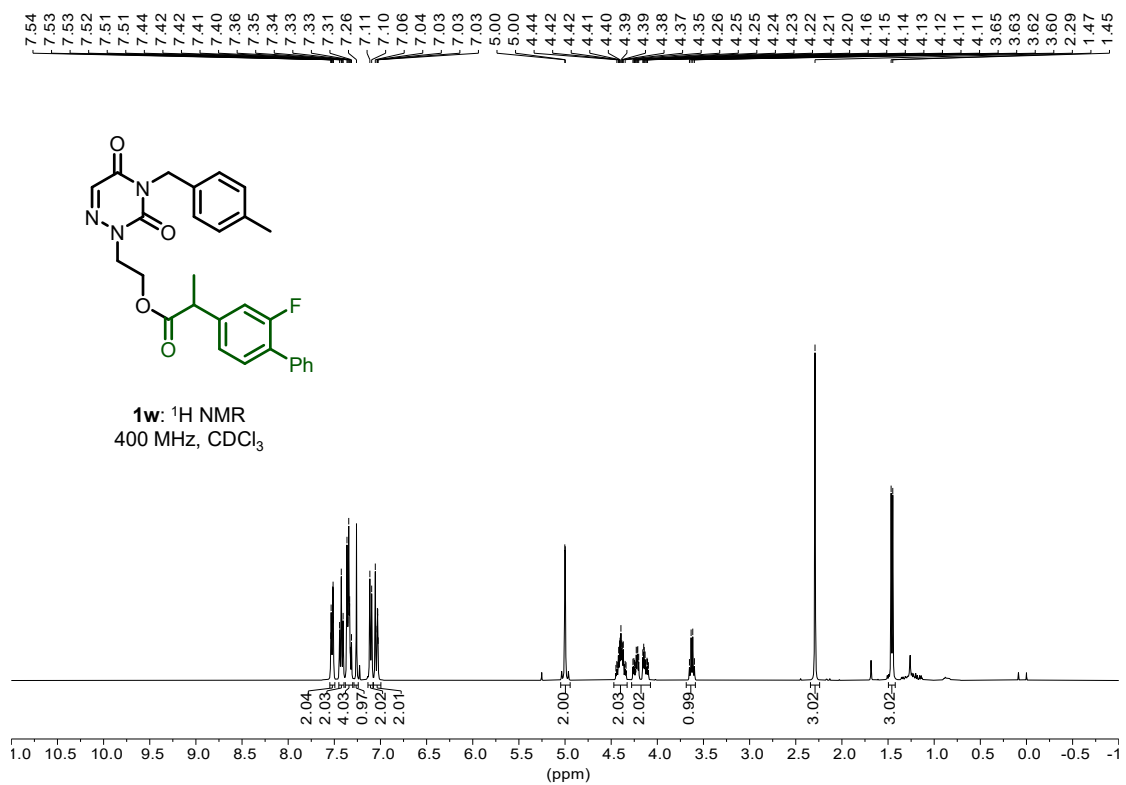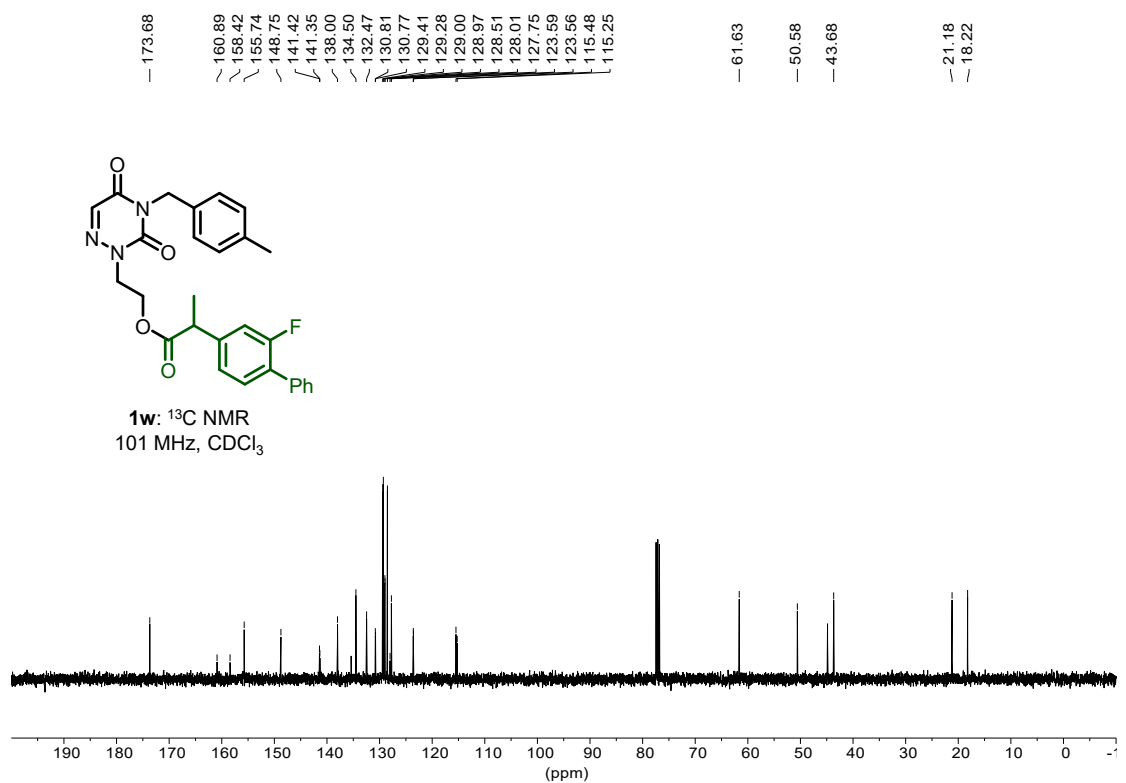

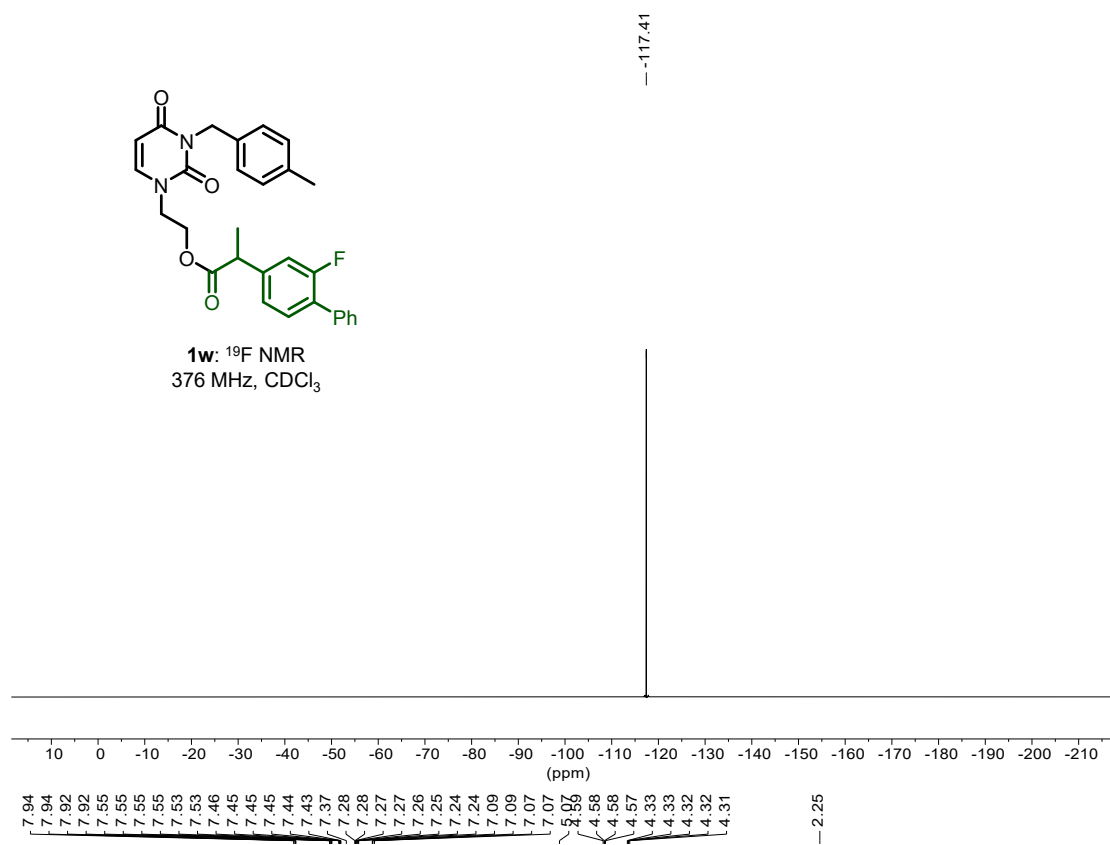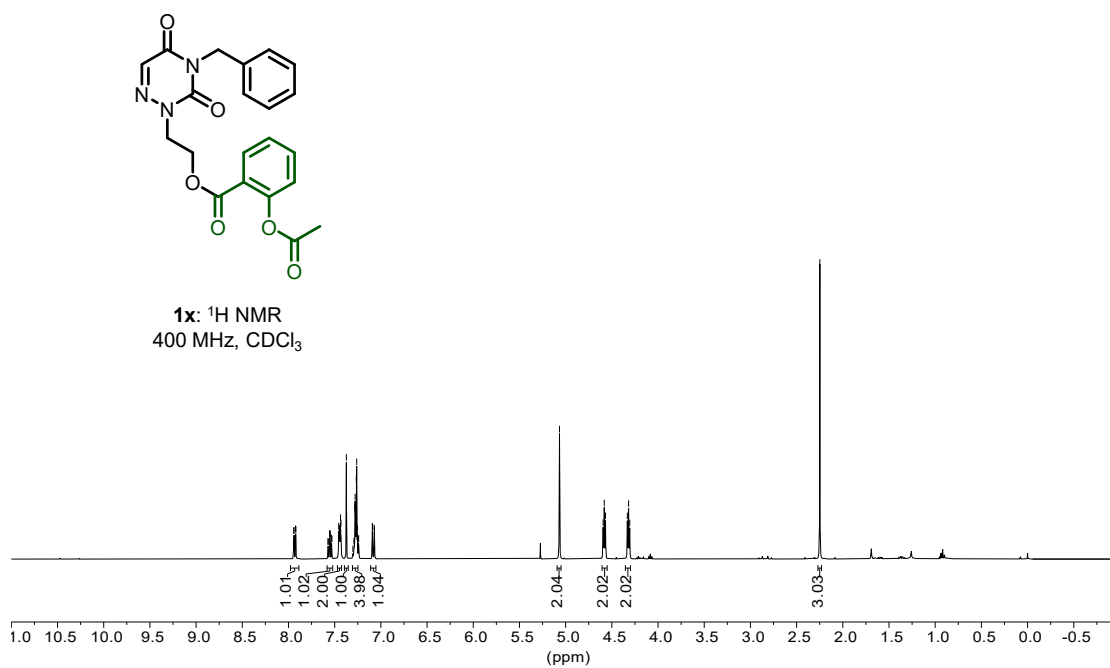

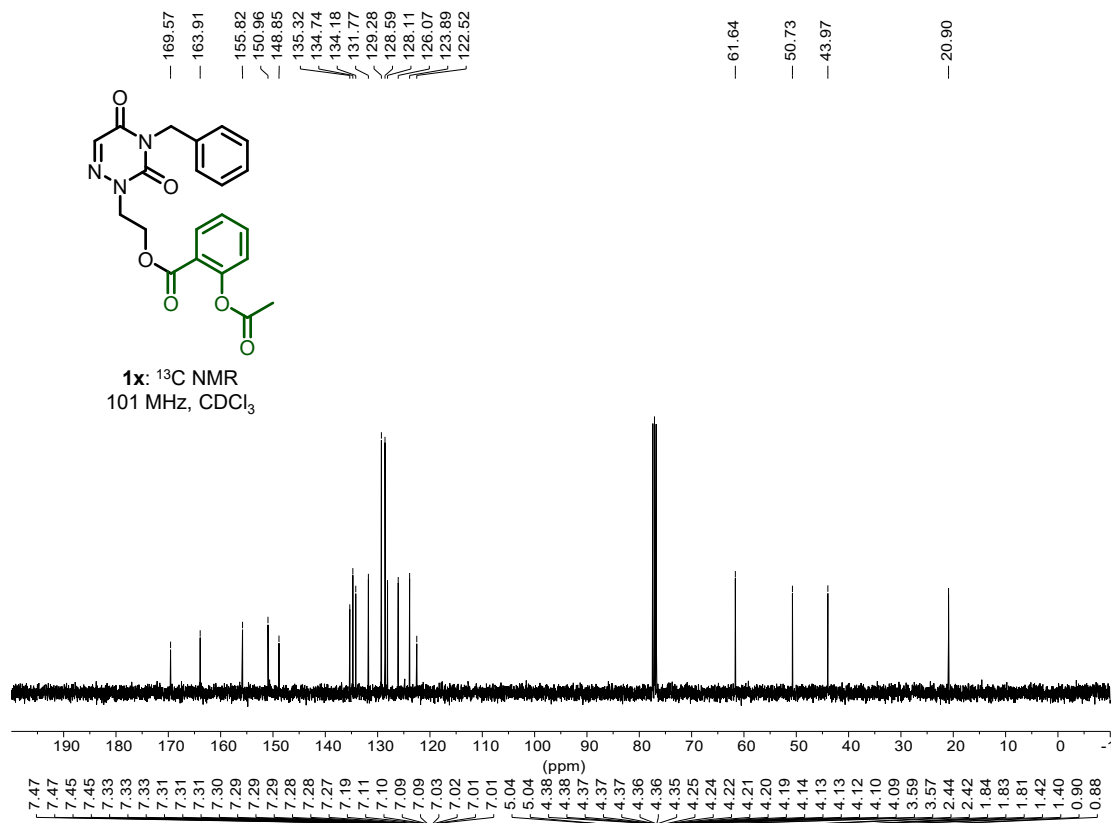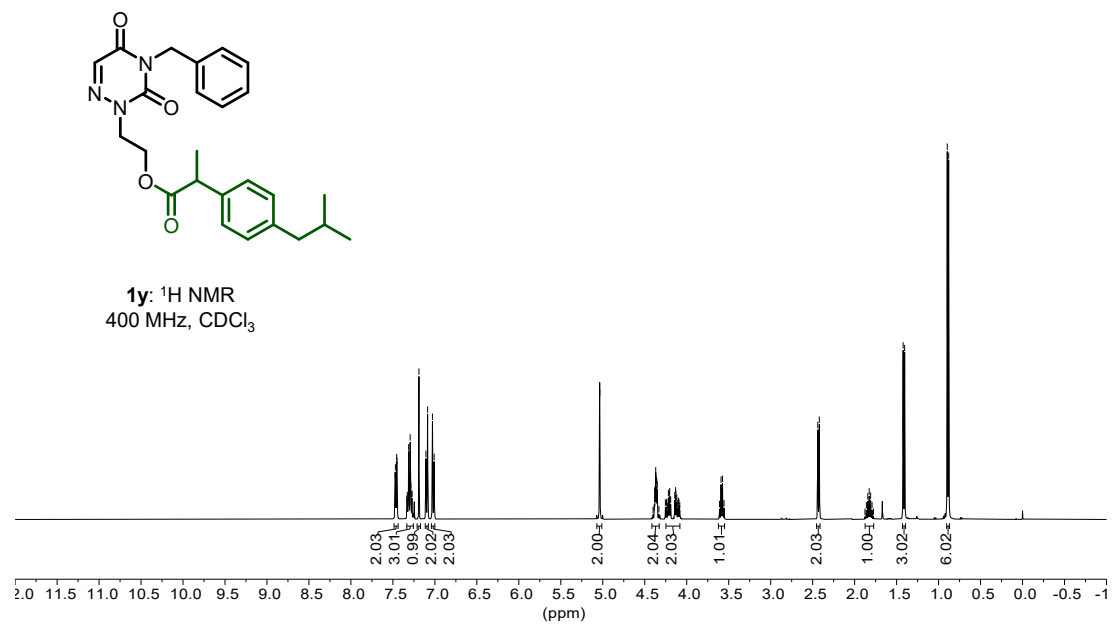

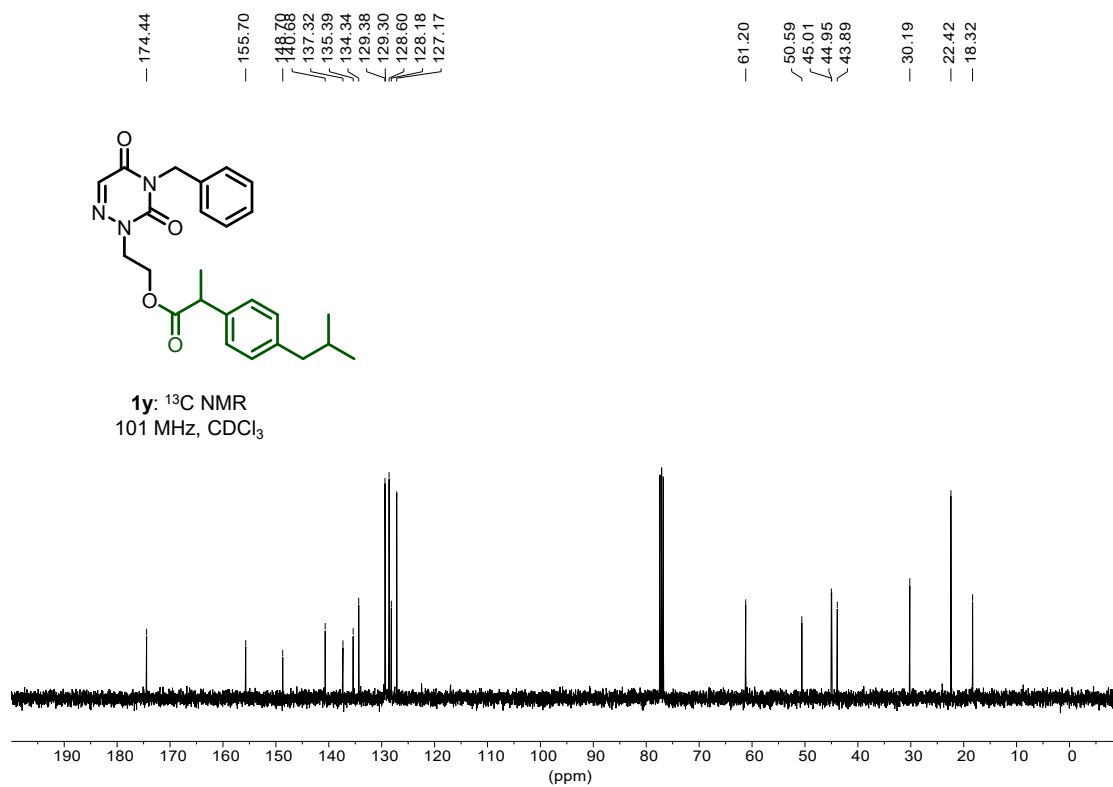

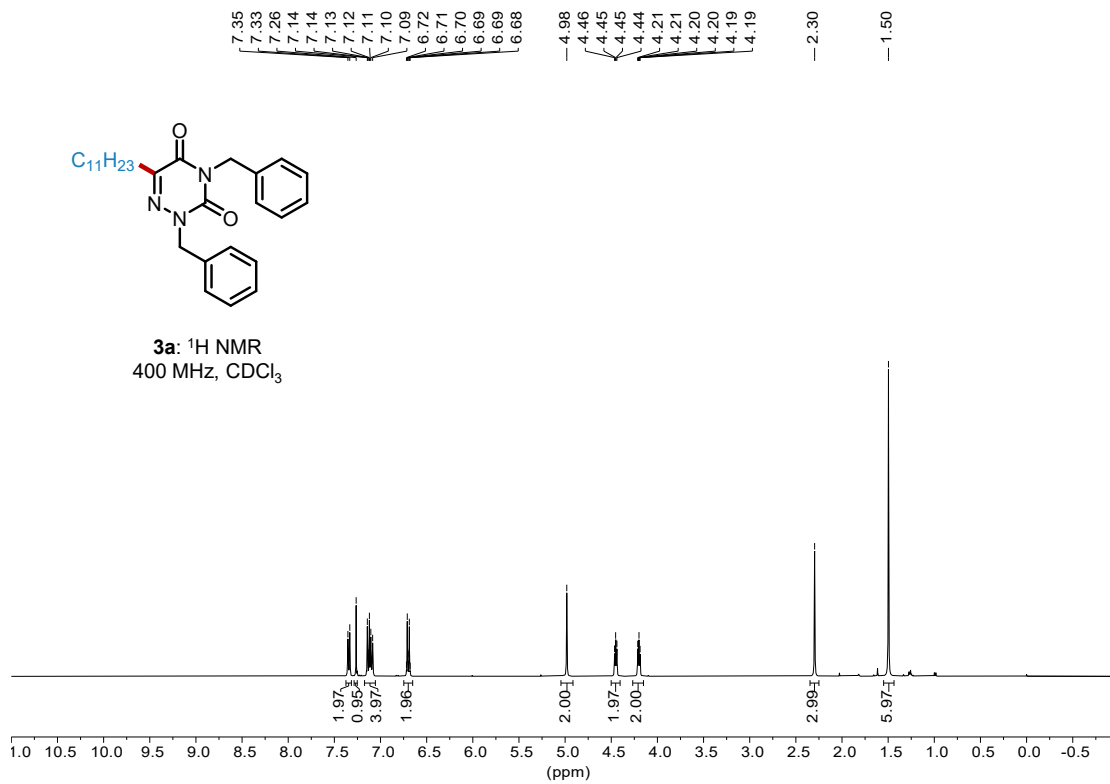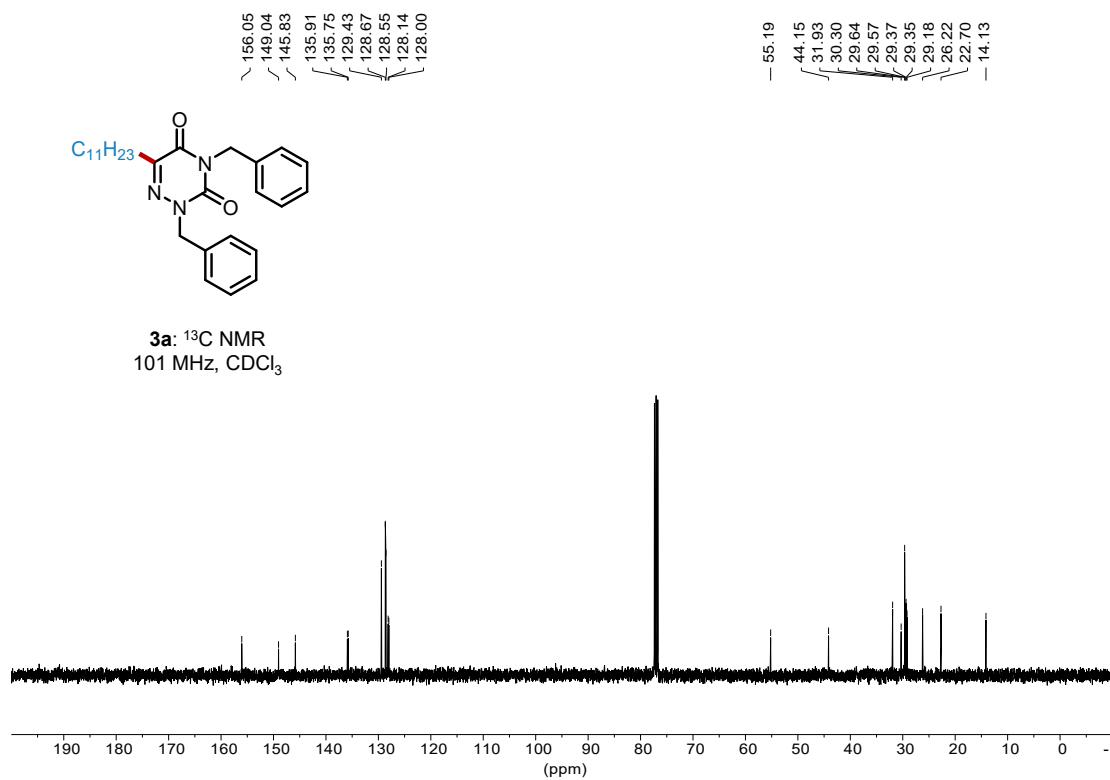

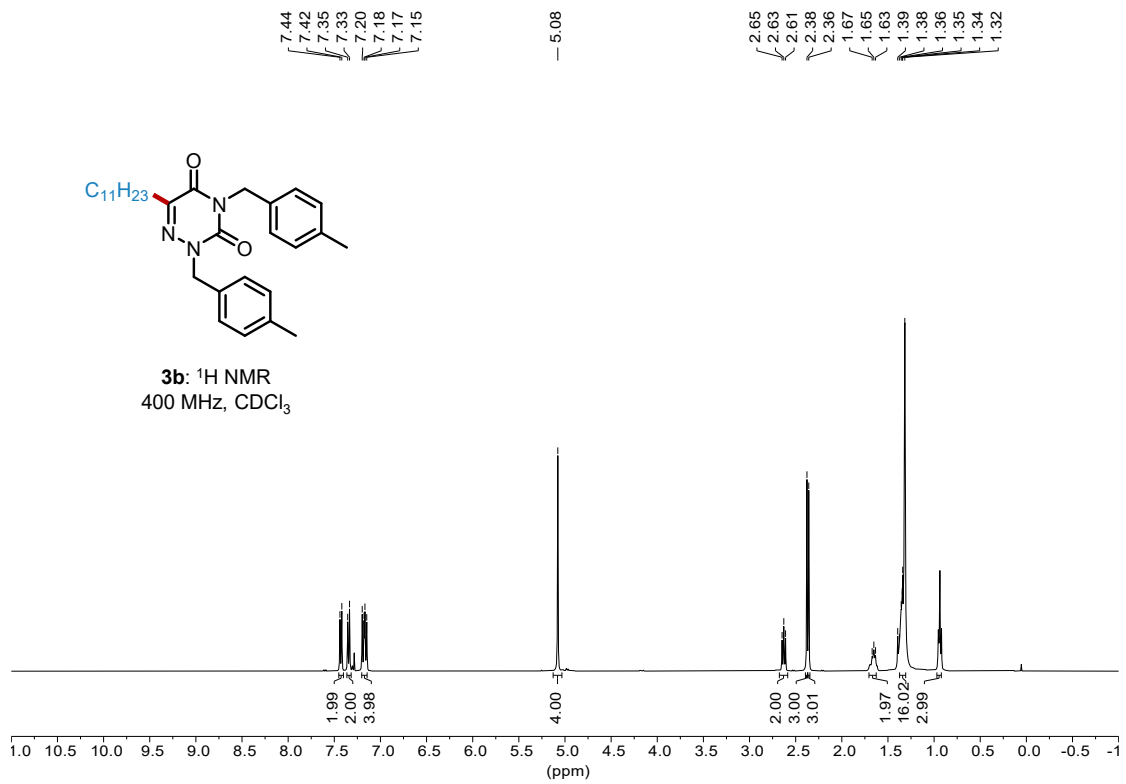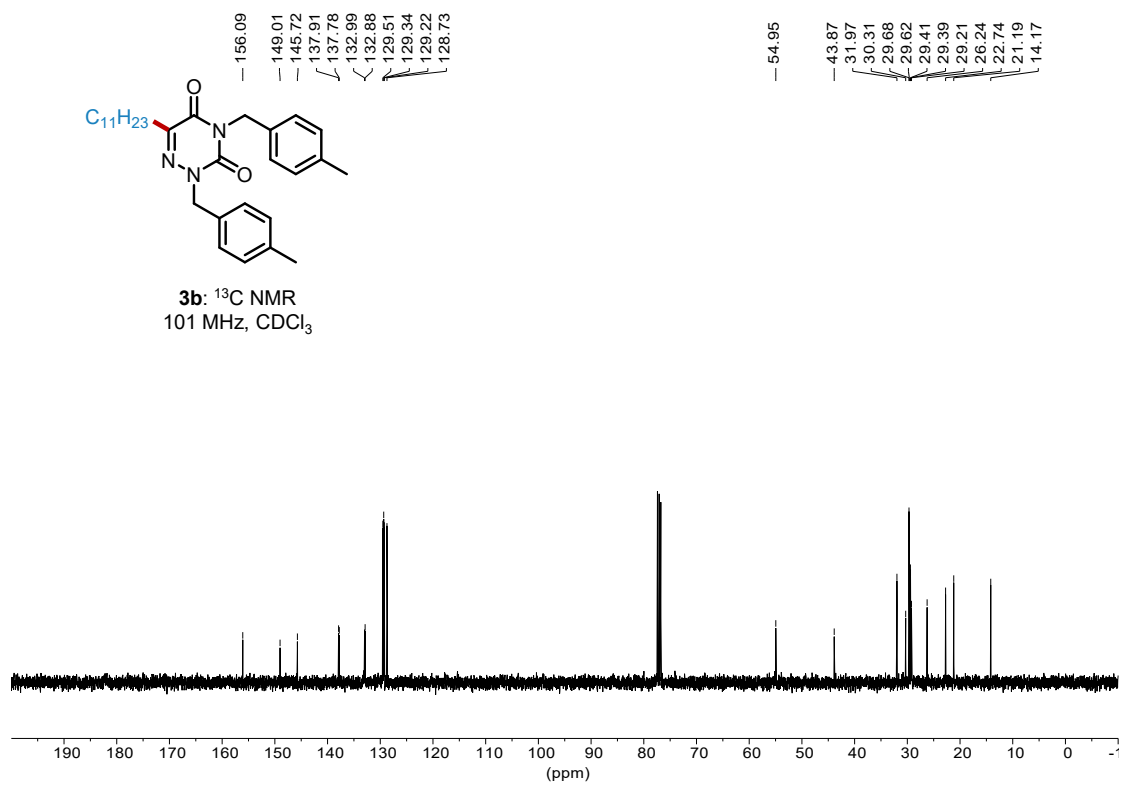

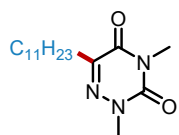

**3c:**  $^1H$  NMR  
400 MHz,  $CDCl_3$

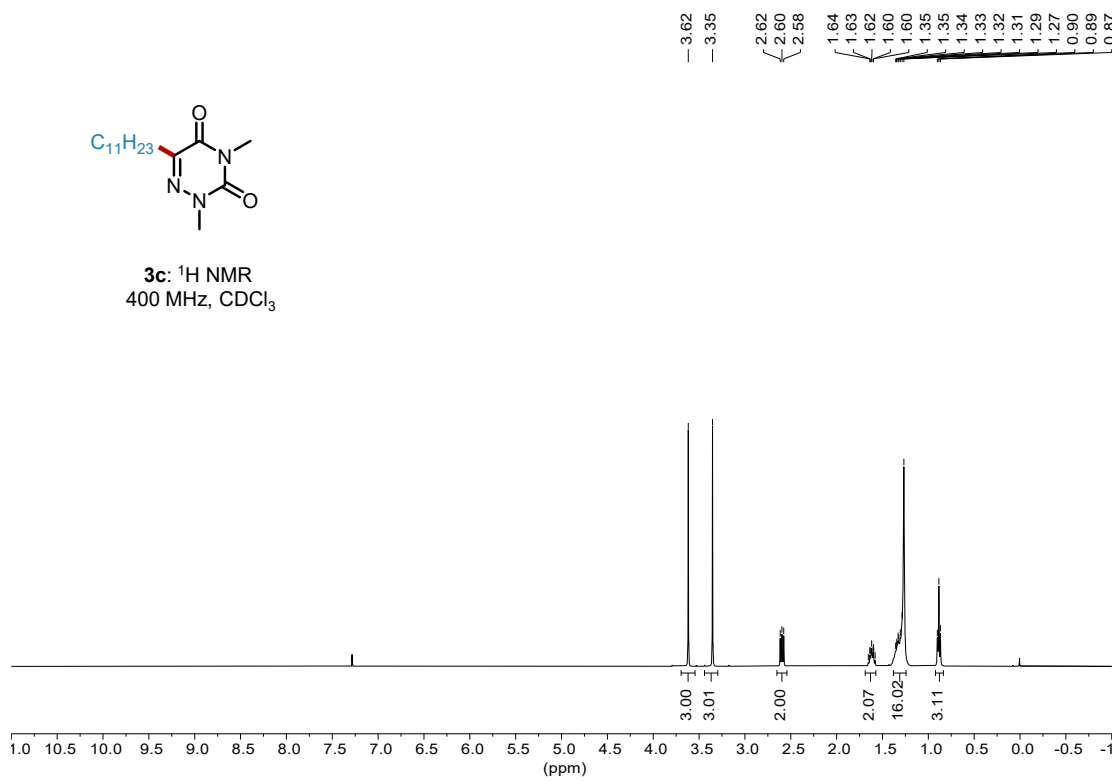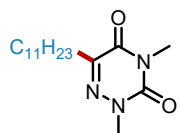

**3c:**  $^{13}C$  NMR  
101 MHz,  $CDCl_3$

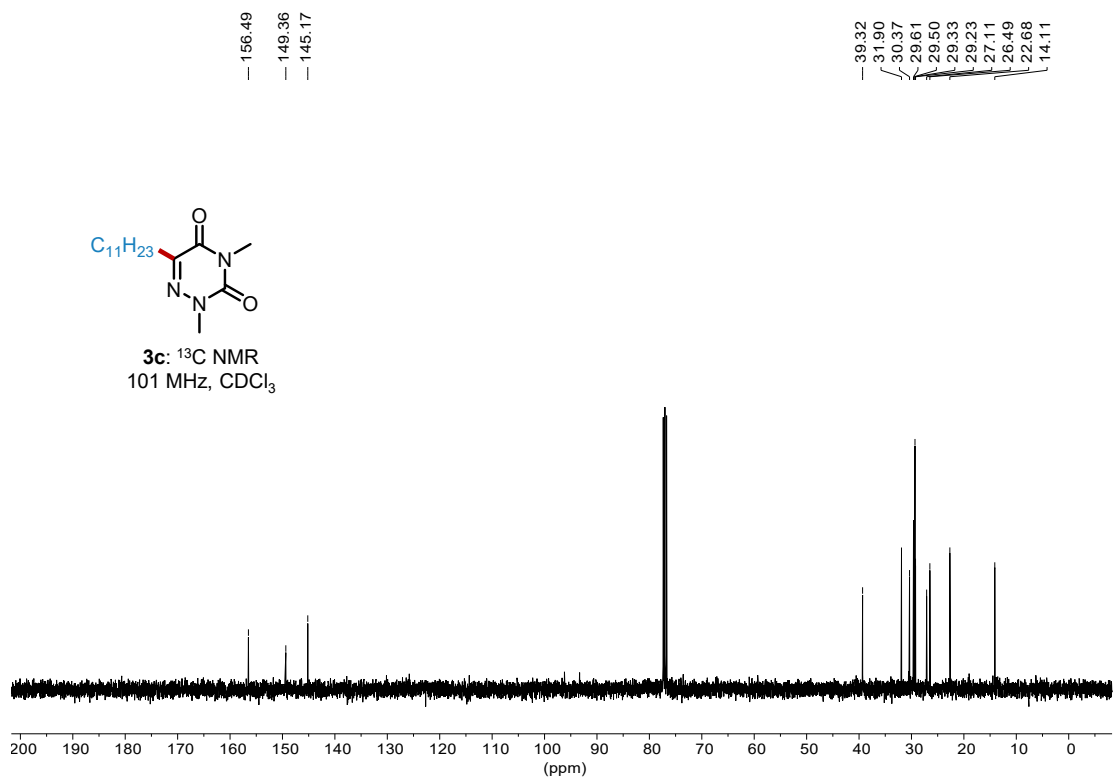



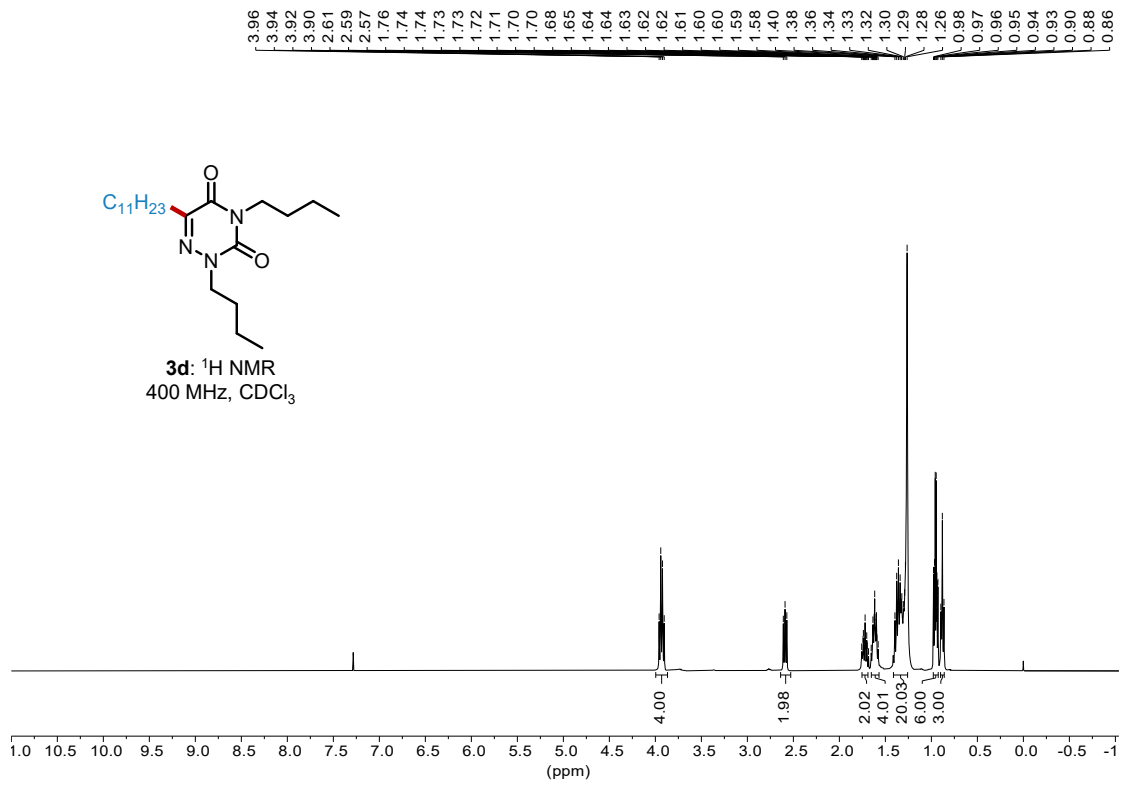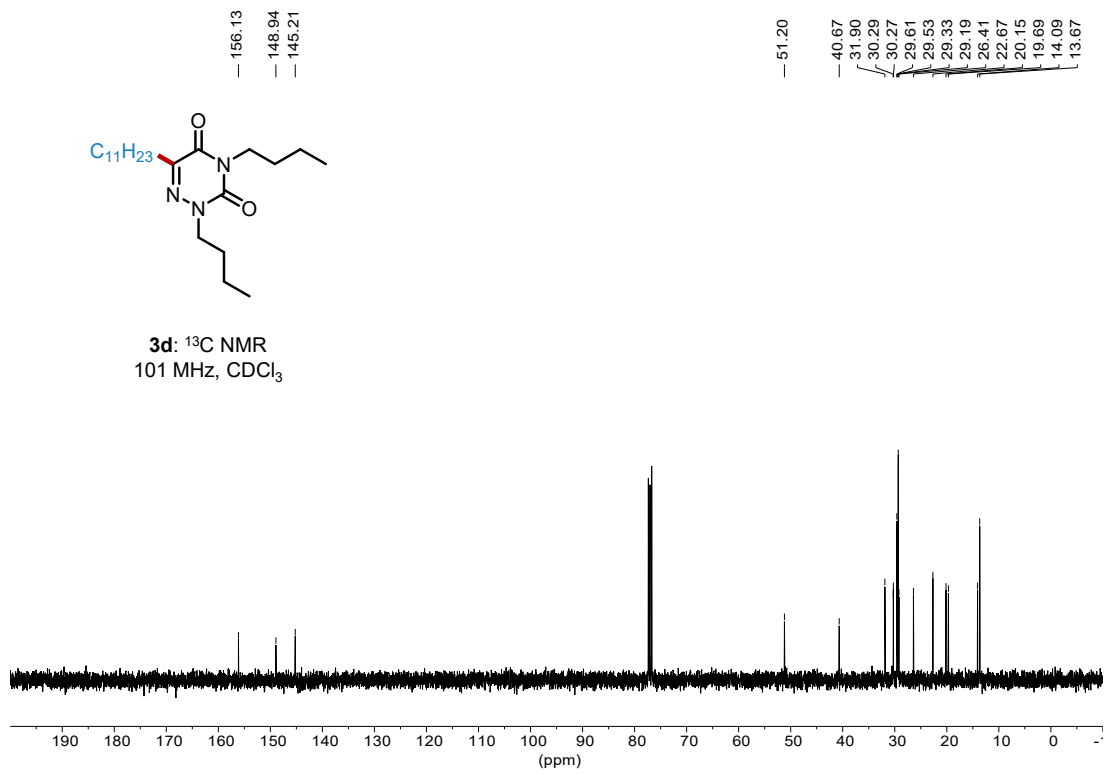

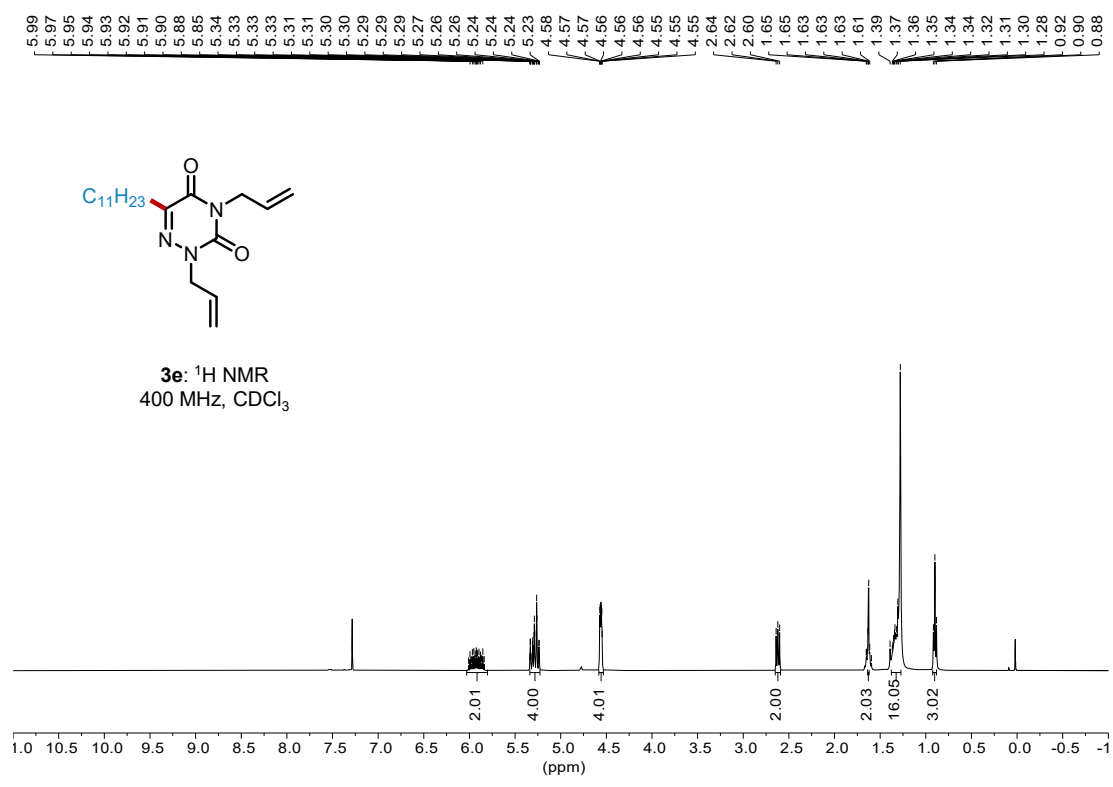

- 155.81
- 148.58
- 145.83
- 131.62
- 130.53
- 119.06
- 118.77
- 53.86
- 42.87
- 31.91
- 30.32
- 29.61
- 29.53
- 29.34
- 29.32
- 29.19
- 26.39
- 22.68
- 14.11

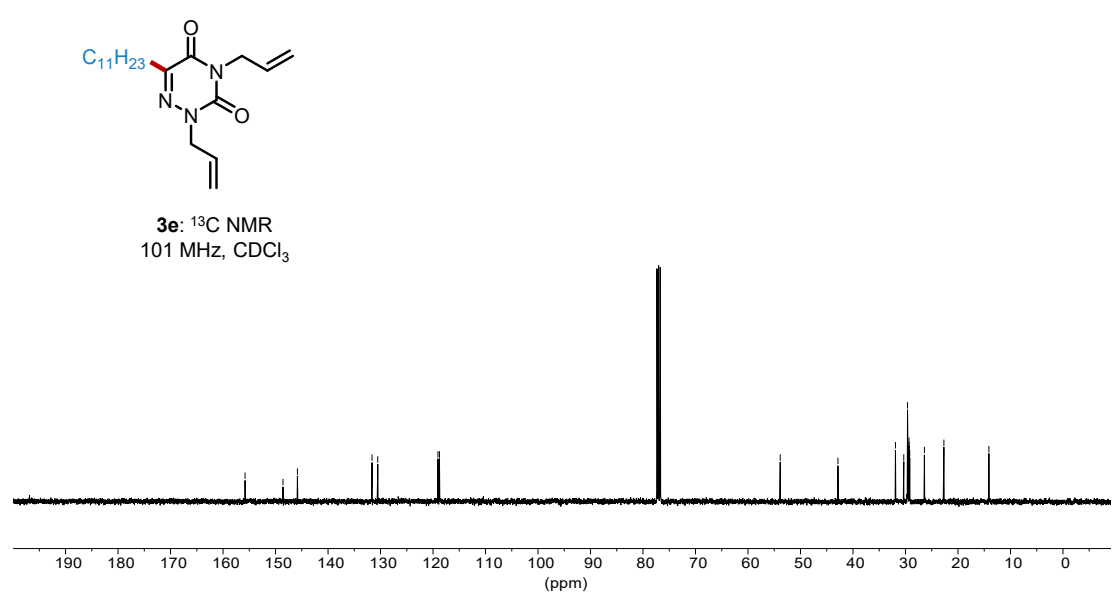

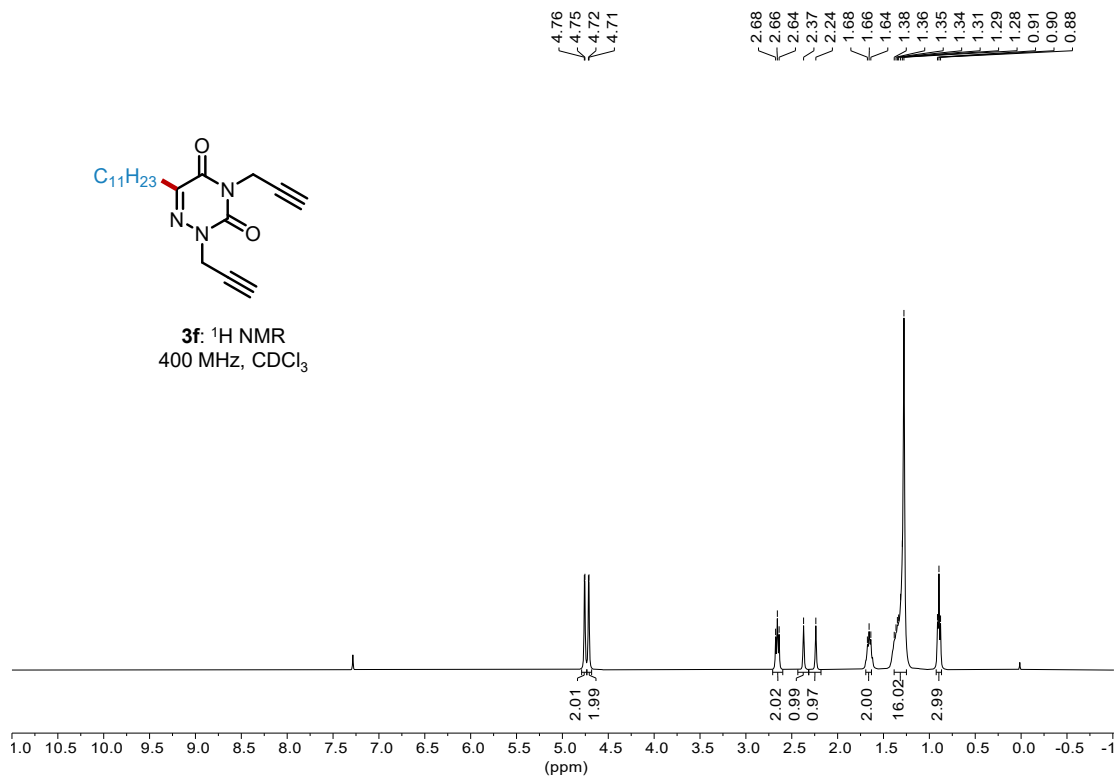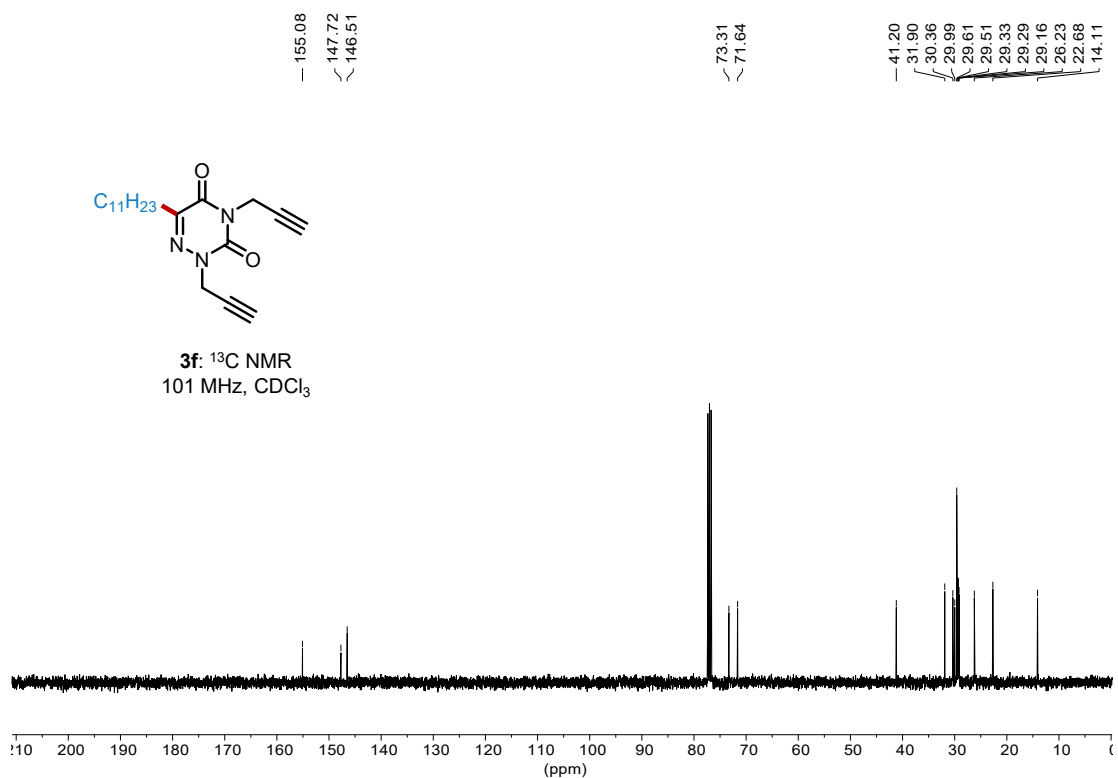

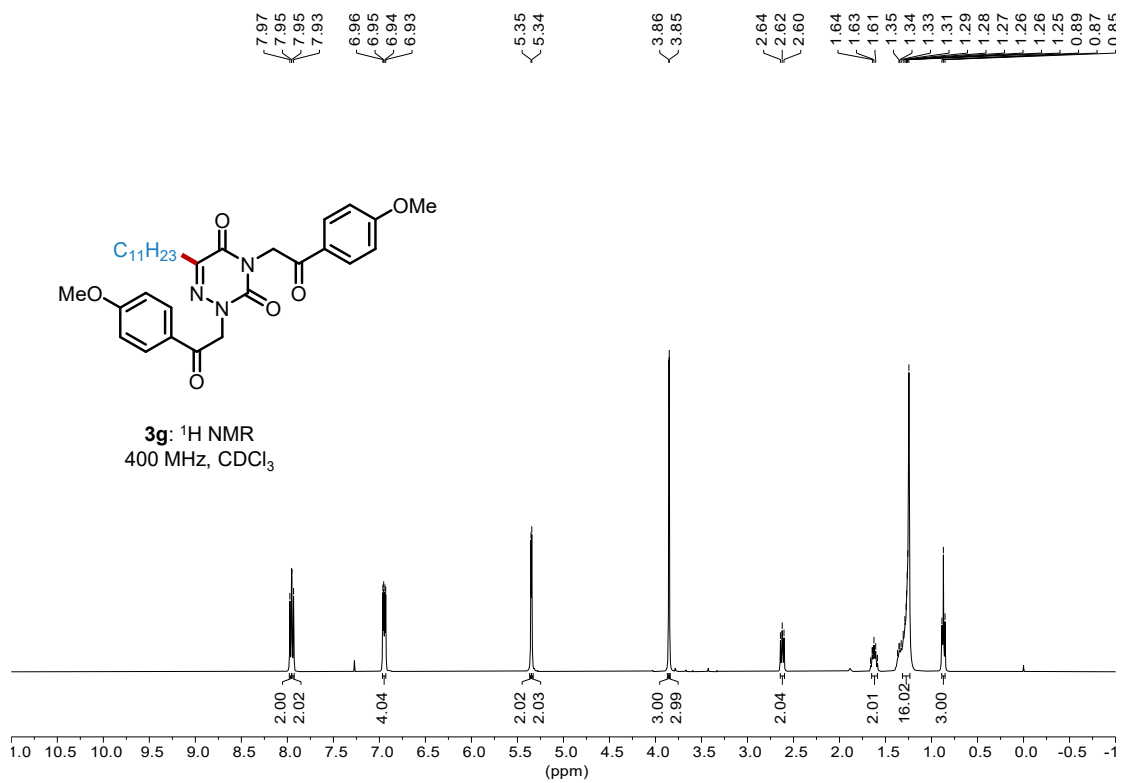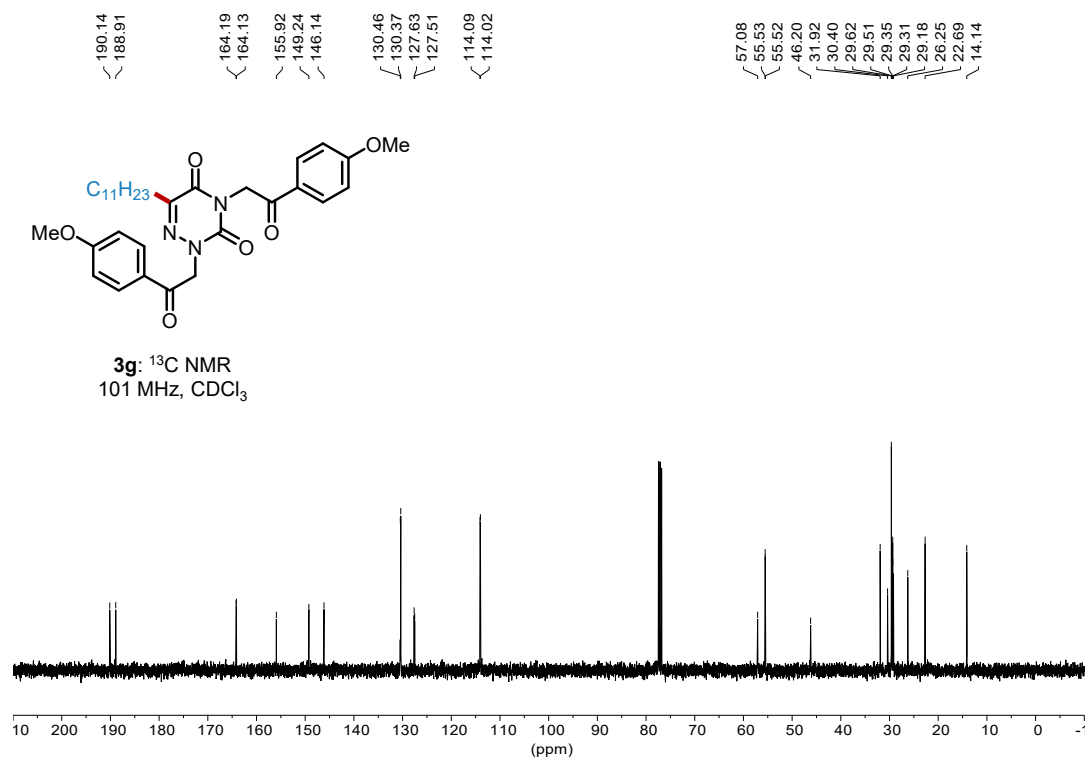

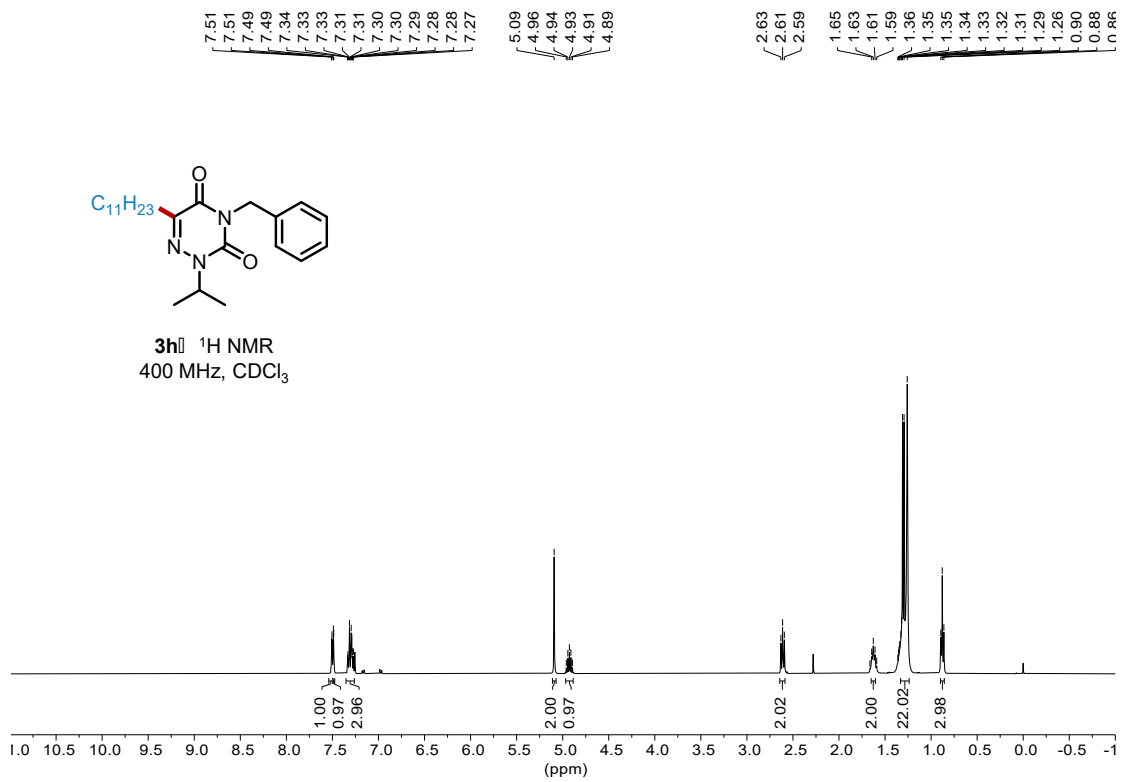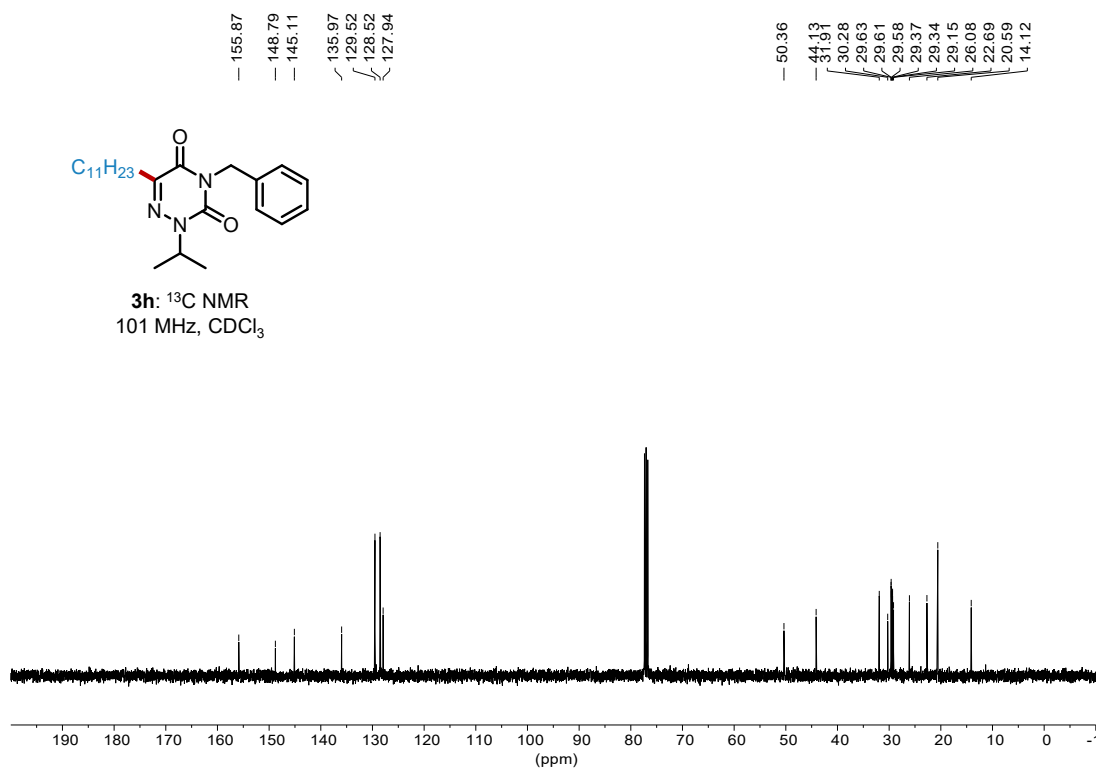

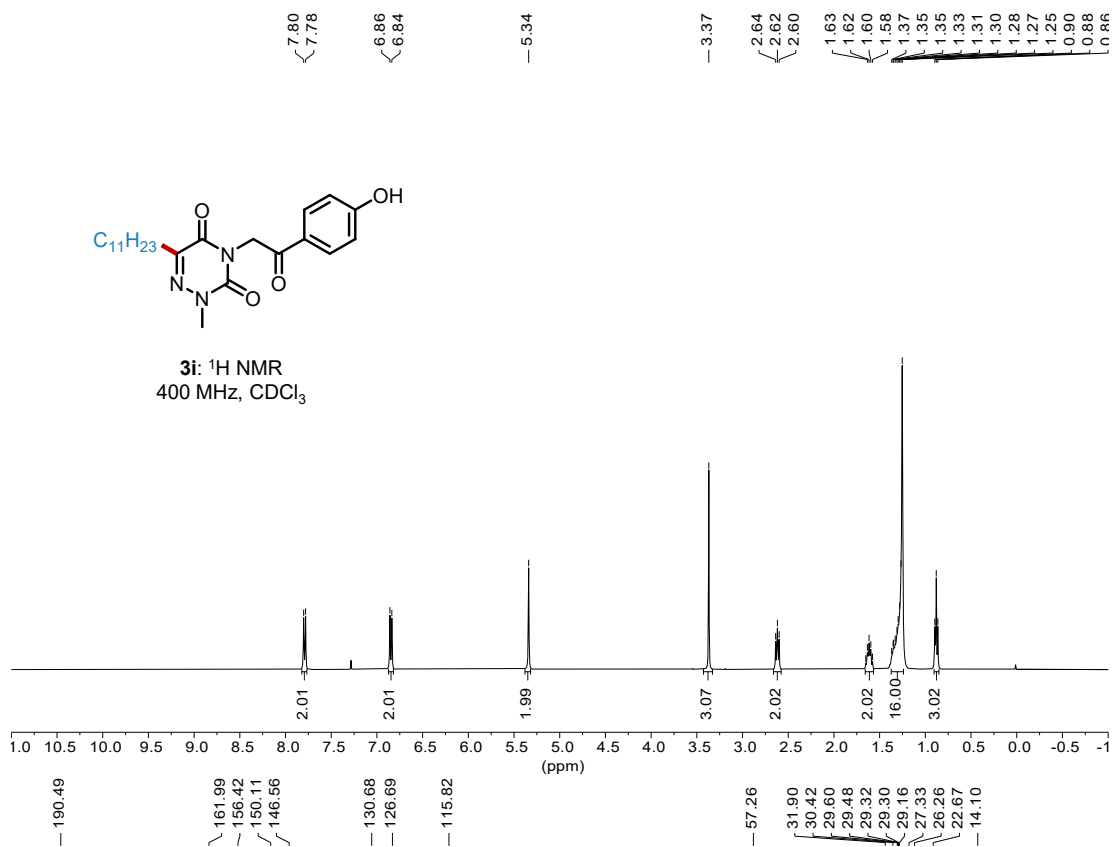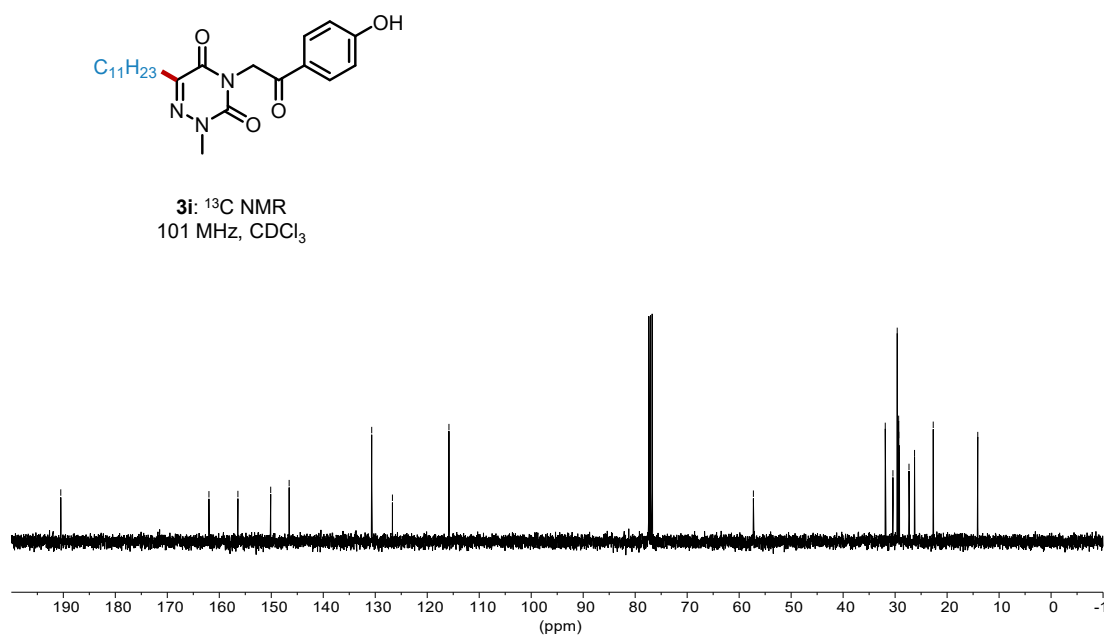

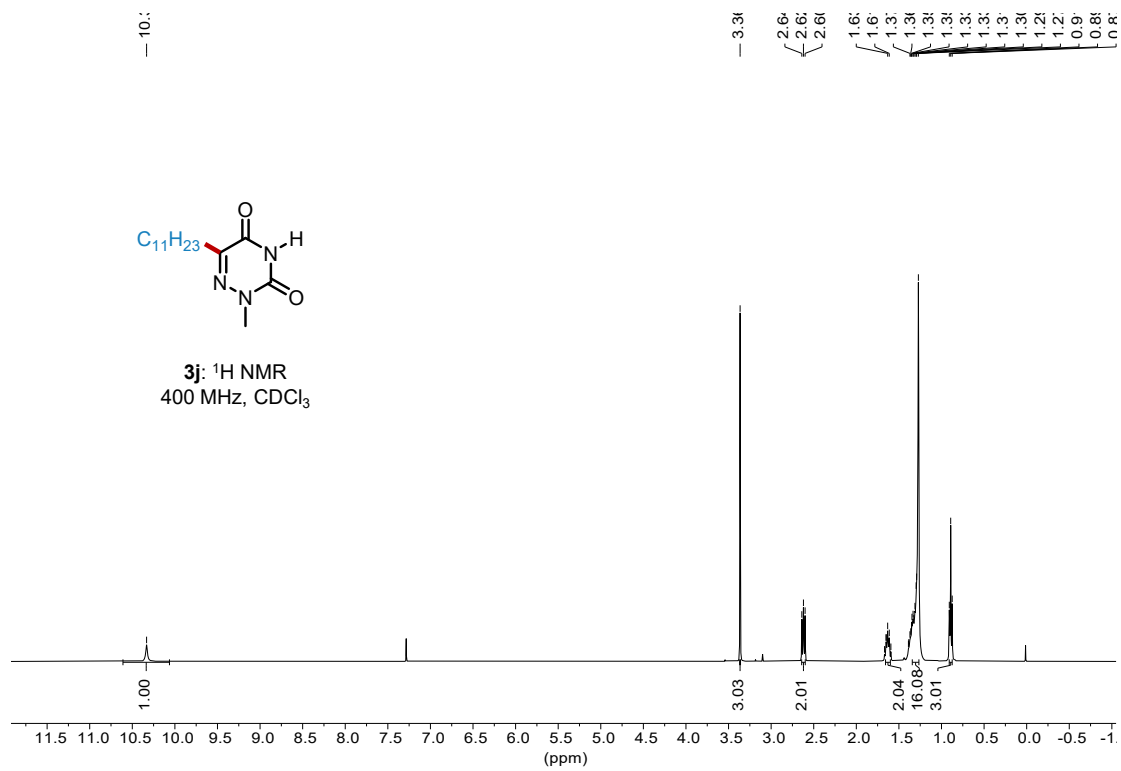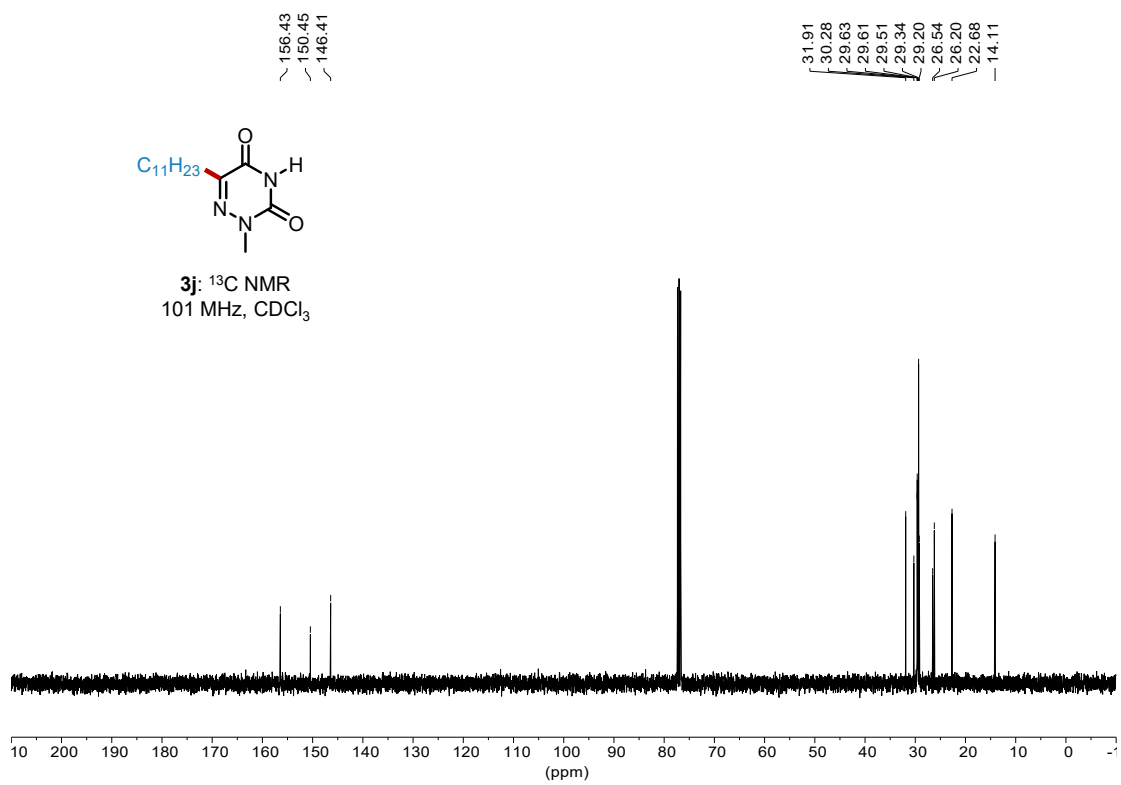

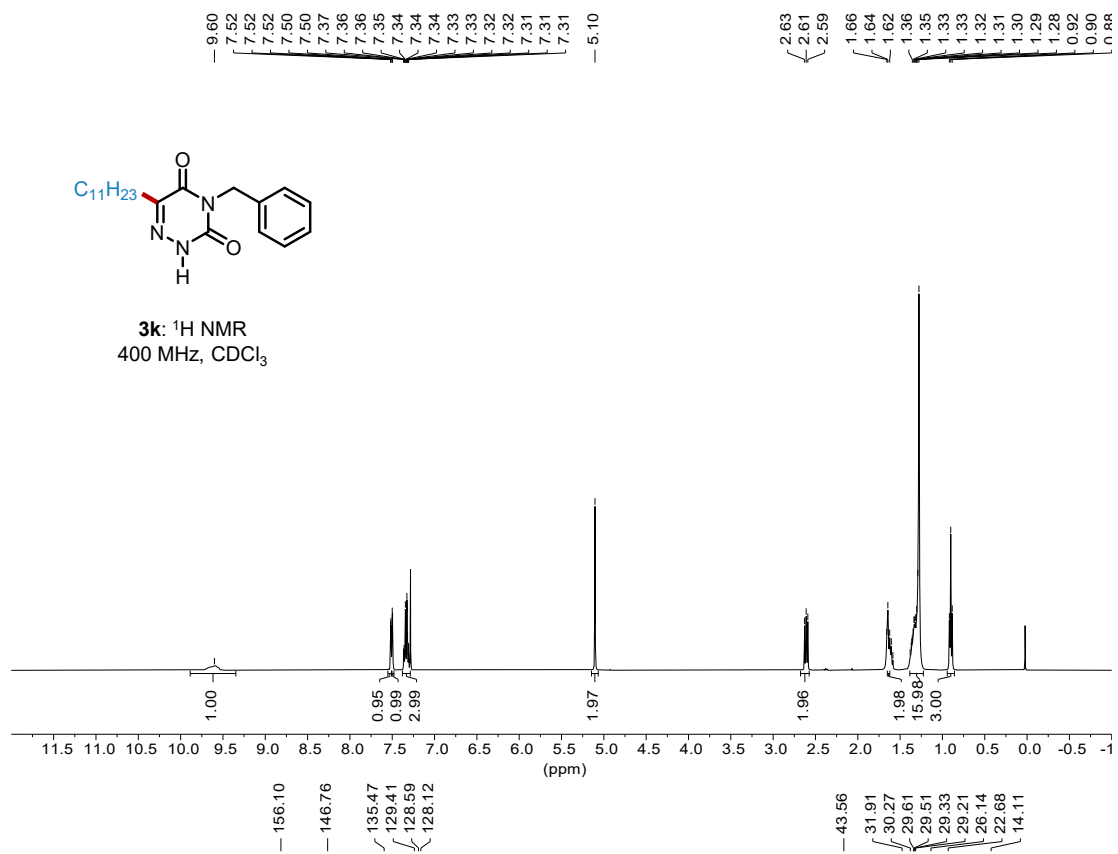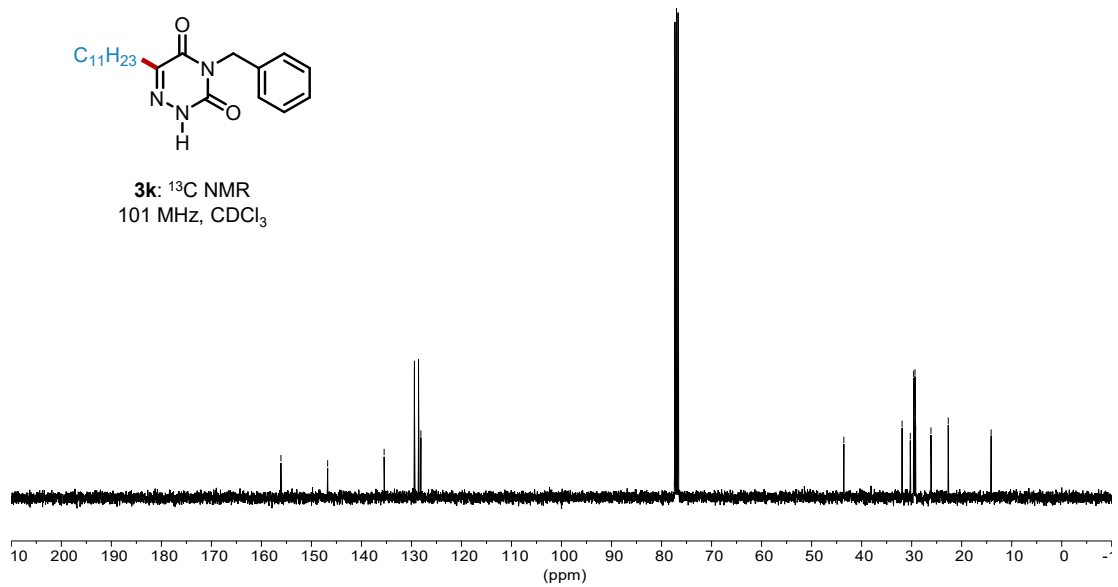



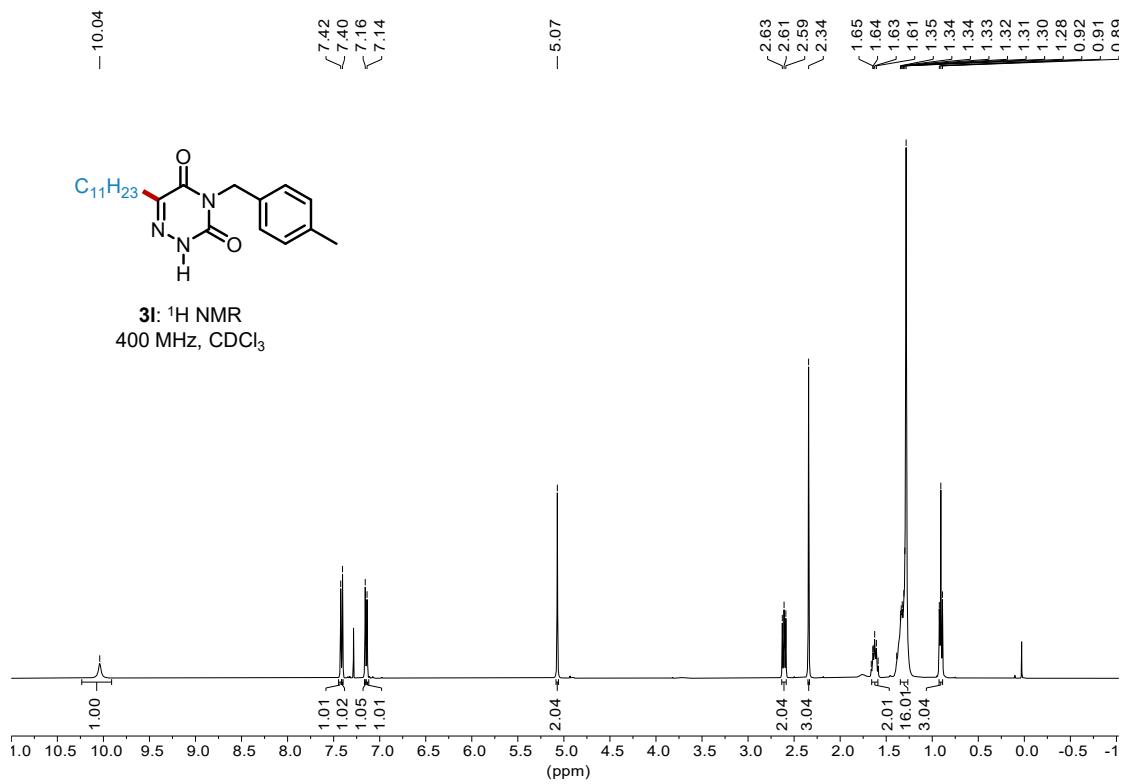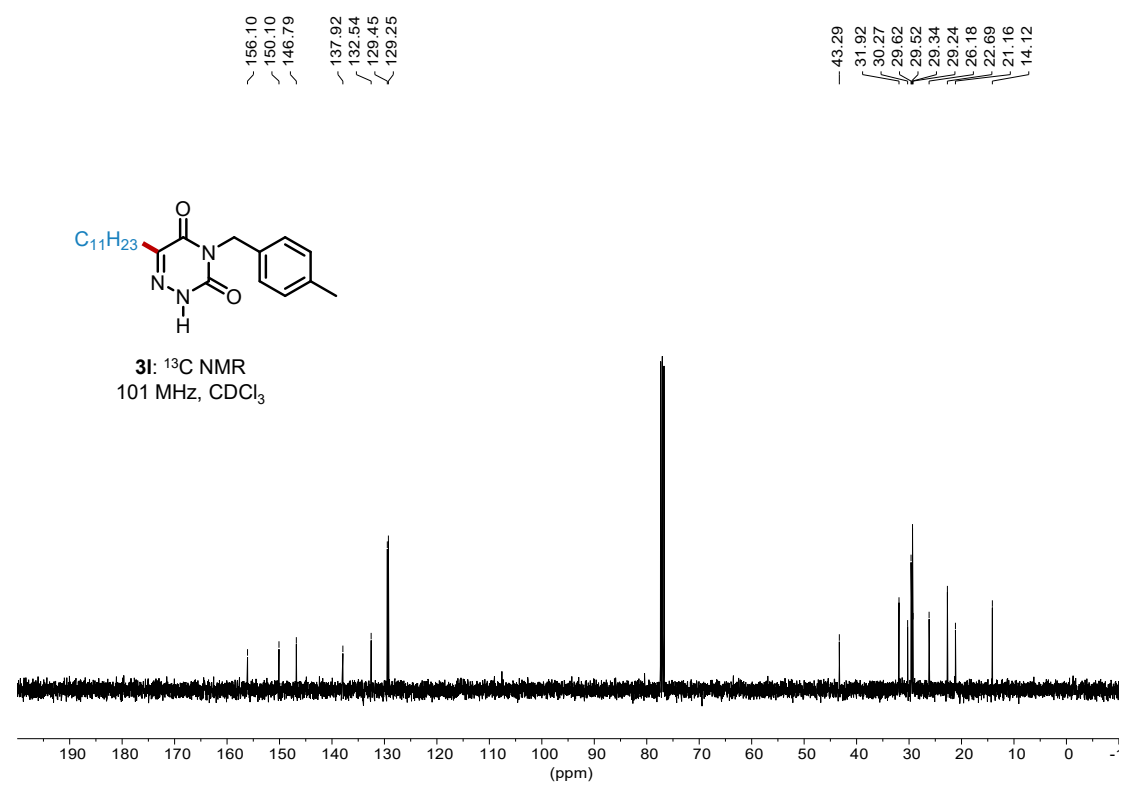

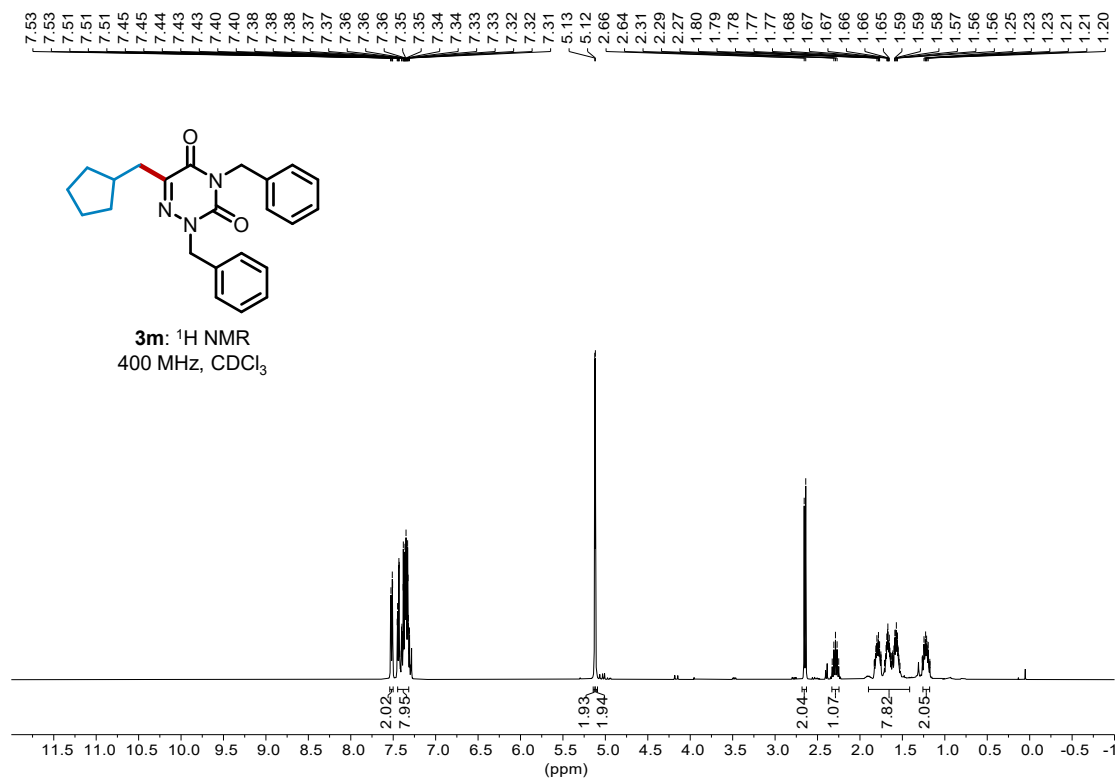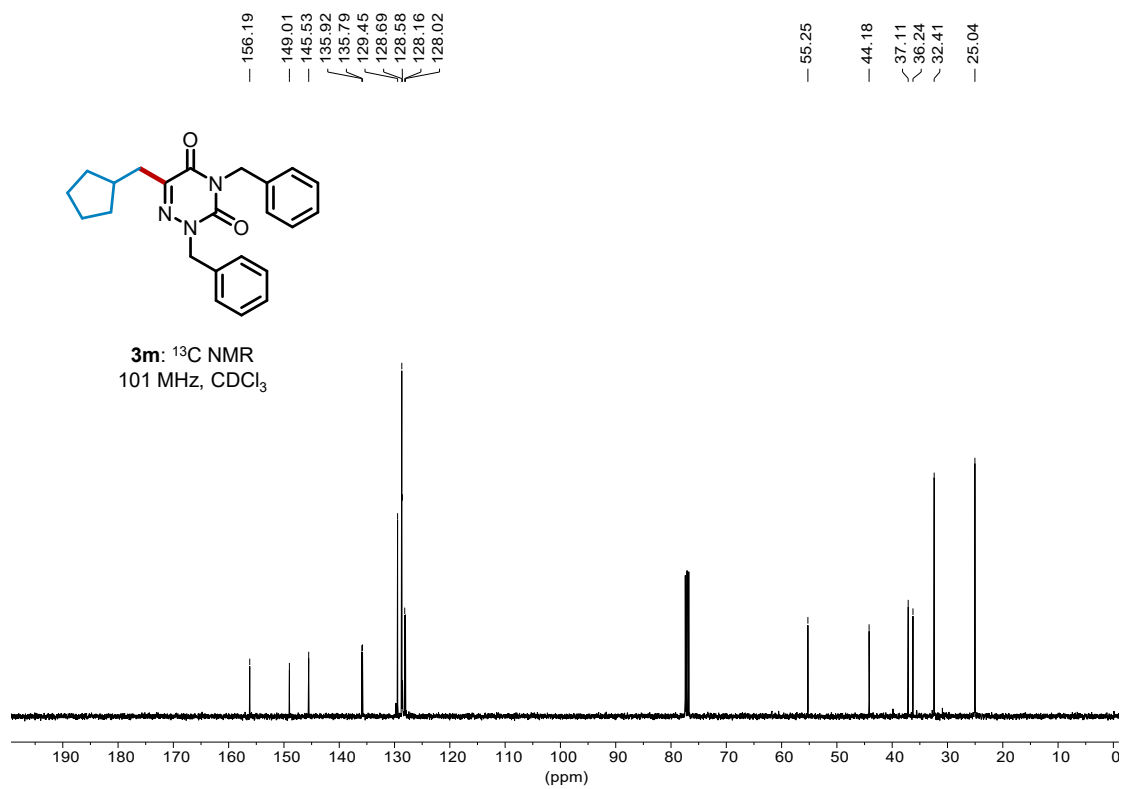

7.52  
7.52  
7.51  
7.50  
7.50  
7.45  
7.44  
7.43  
7.43  
7.42  
7.40  
7.39  
7.39  
7.37  
7.37  
7.37  
7.36  
7.36  
7.36  
7.35  
7.35  
7.34  
7.34  
7.33  
7.32  
7.32  
7.32  
7.30  
7.30  
5.12  
5.11  
2.65  
2.63  
2.61  
2.61  
1.67  
1.66  
1.65  
1.63  
1.37  
1.36  
1.35  
1.35  
1.34  
1.34  
1.33  
1.32  
1.31  
1.31  
1.30  
1.29  
1.29  
0.94  
0.93  
0.92  
0.92  
0.91  
0.91

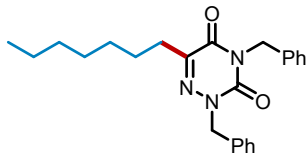

**3n:**  $^1\text{H}$  NMR  
400 MHz,  $\text{CDCl}_3$

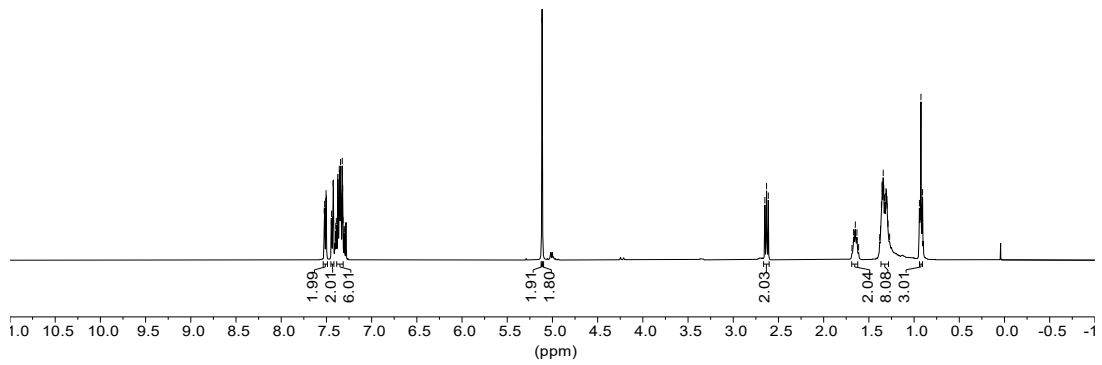

156.06  
149.04  
145.82  
135.93  
135.77  
129.44  
128.69  
128.68  
128.56  
128.15  
128.01

55.20  
44.15  
31.79  
30.31  
29.13  
28.03  
26.23  
22.64  
14.12

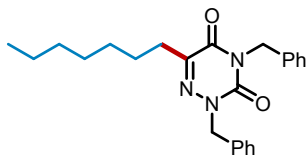

**3n:**  $^{13}\text{C}$  NMR  
101 MHz,  $\text{CDCl}_3$

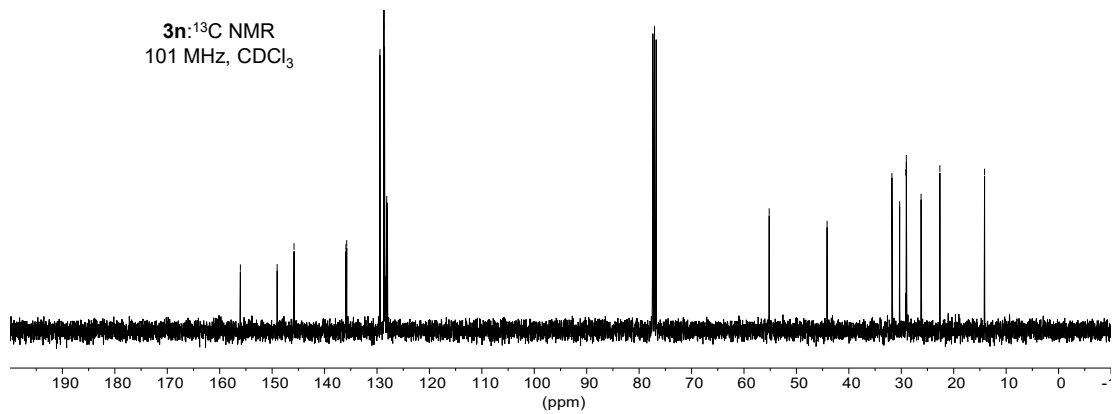

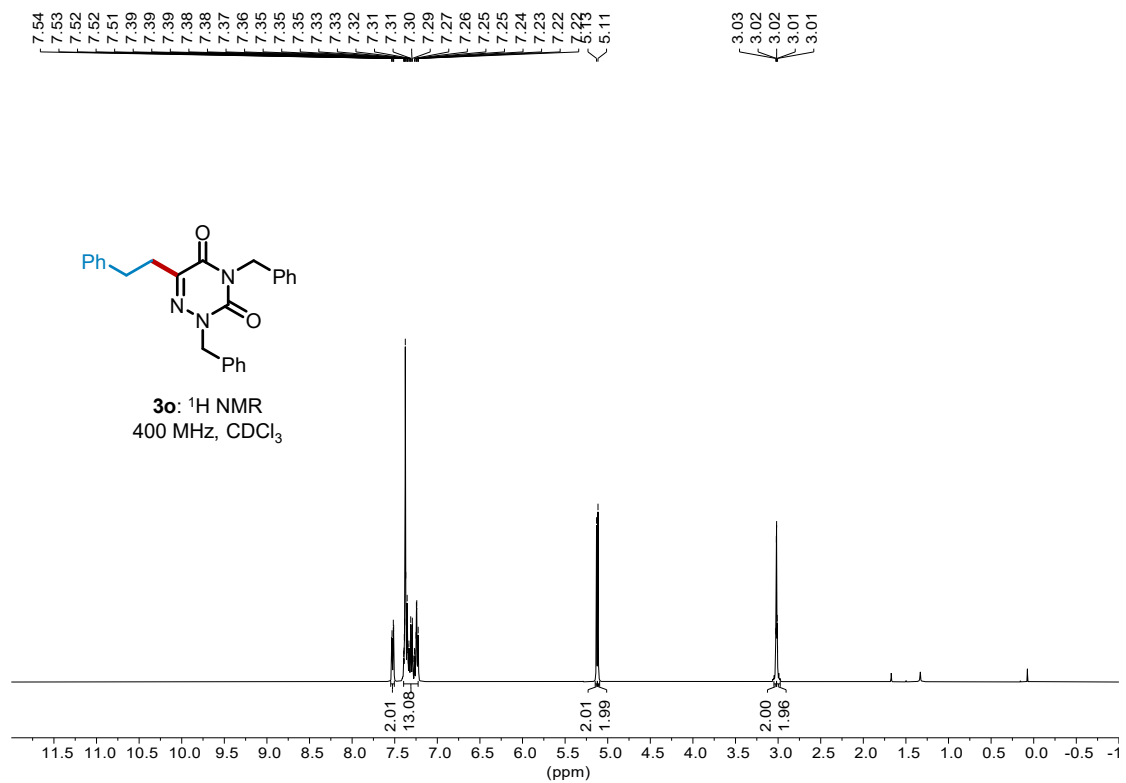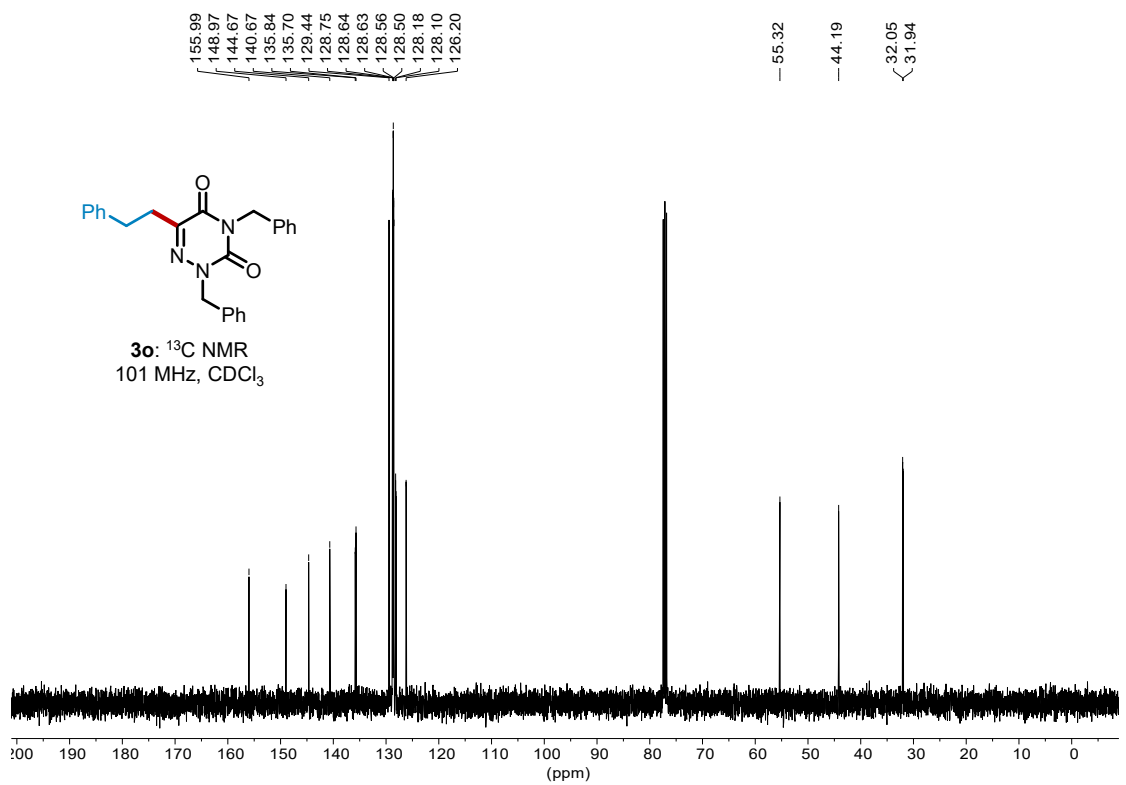

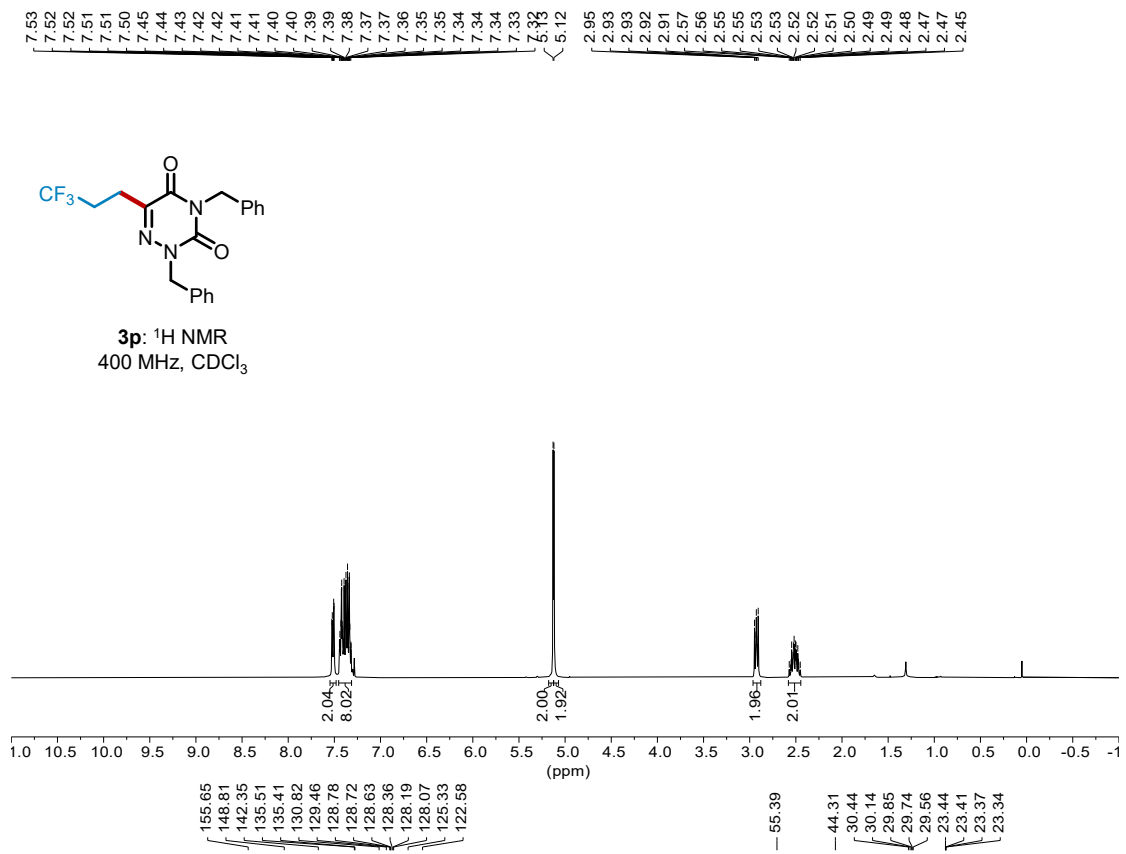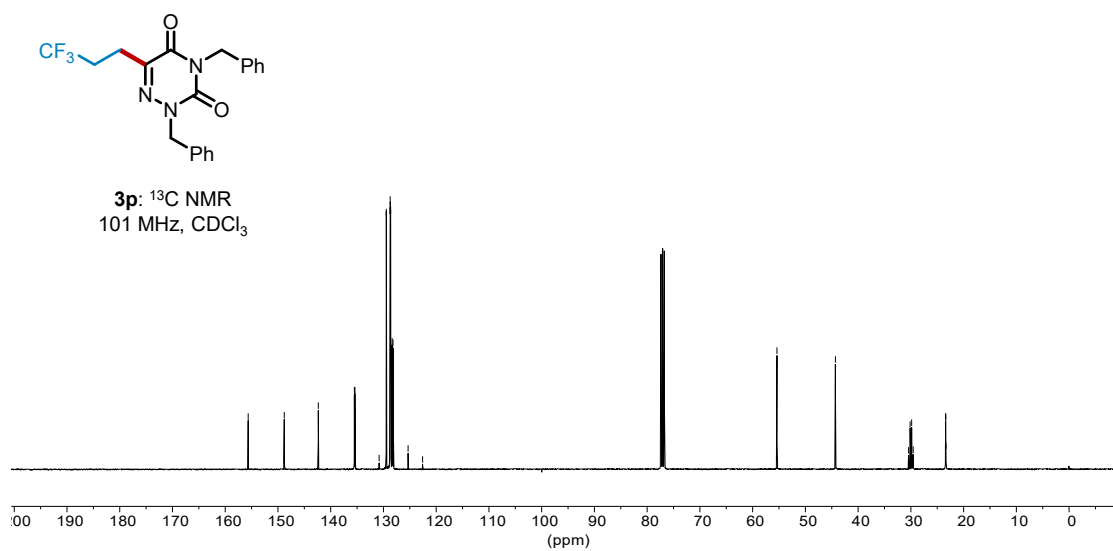

—66.32

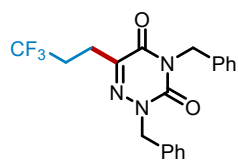

**3p:**  $^{19}\text{F}$  NMR  
376 MHz,  $\text{CDCl}_3$

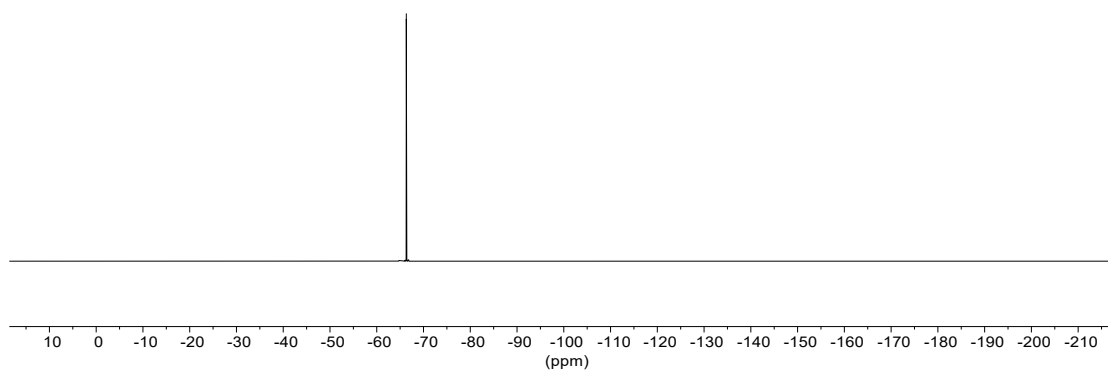

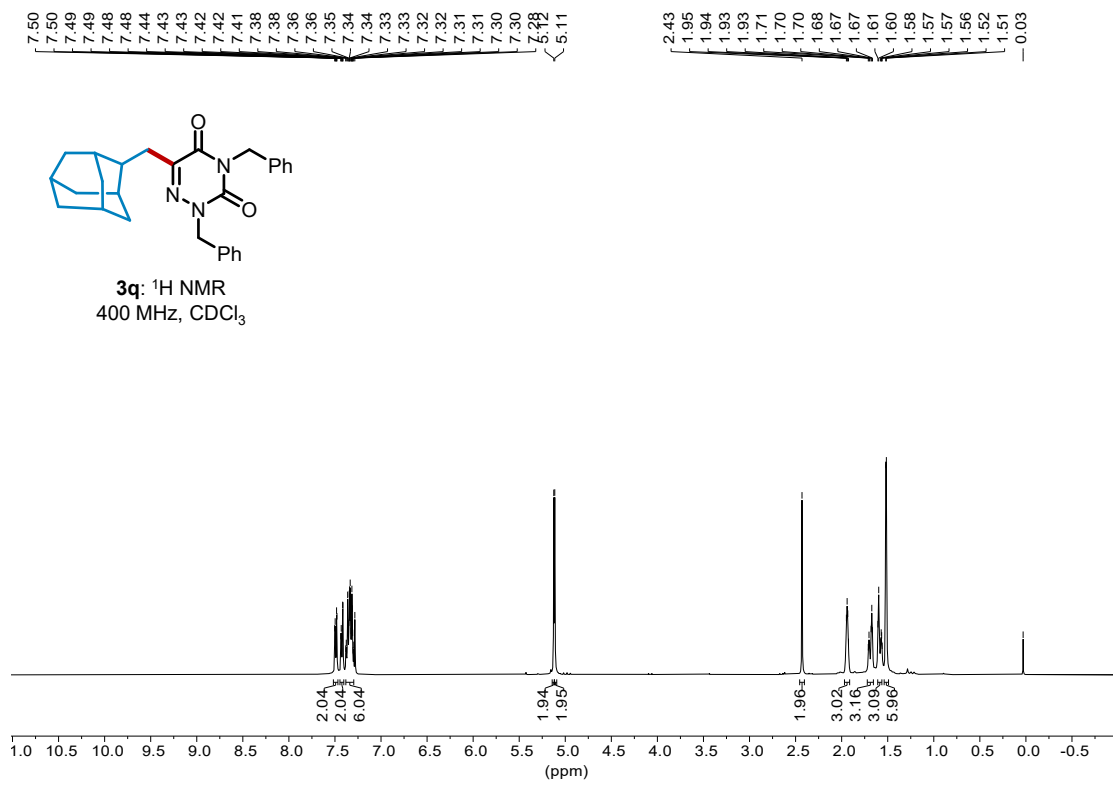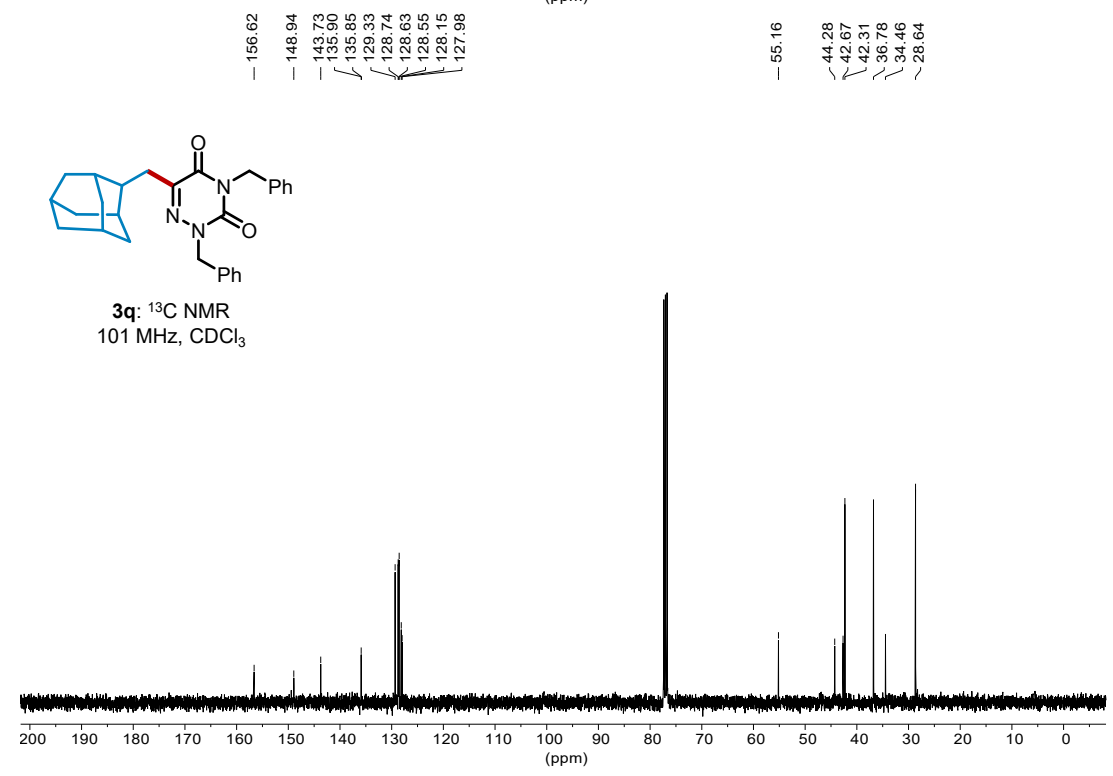

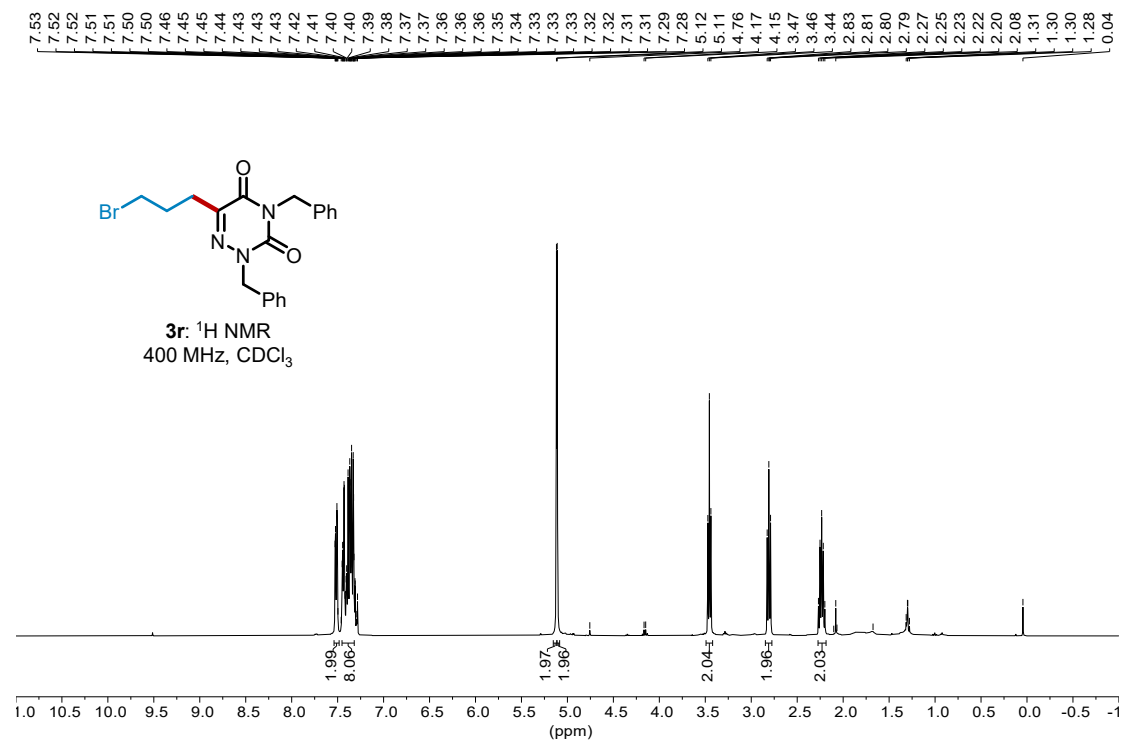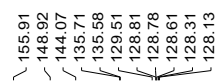

55.23

44.26

32.57

28.86

28.84

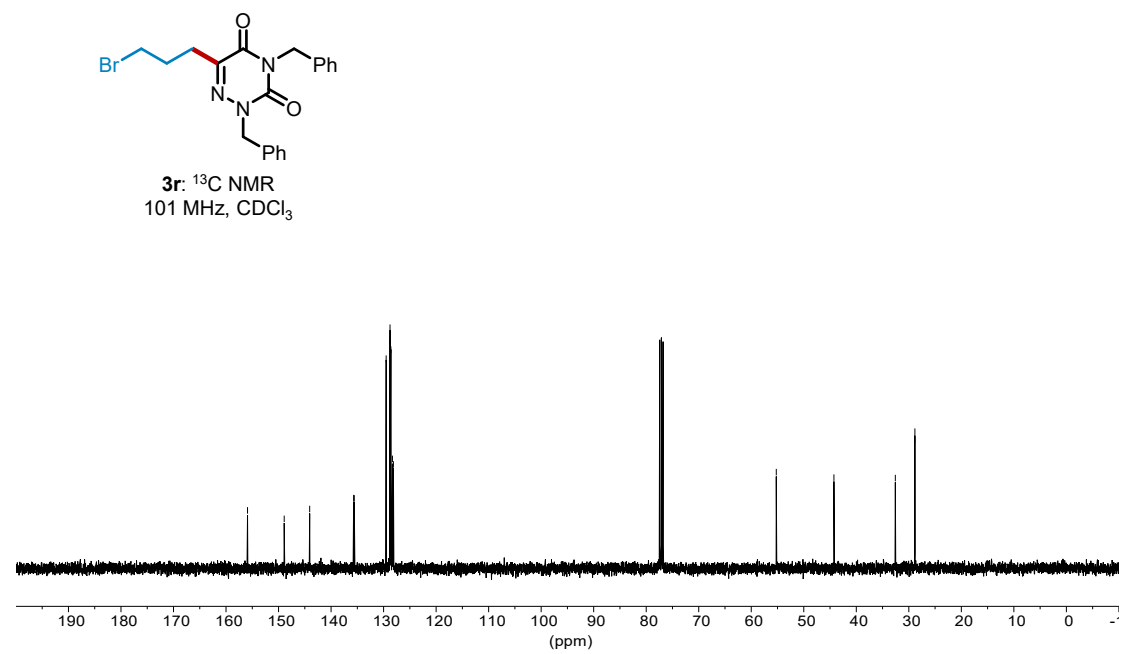



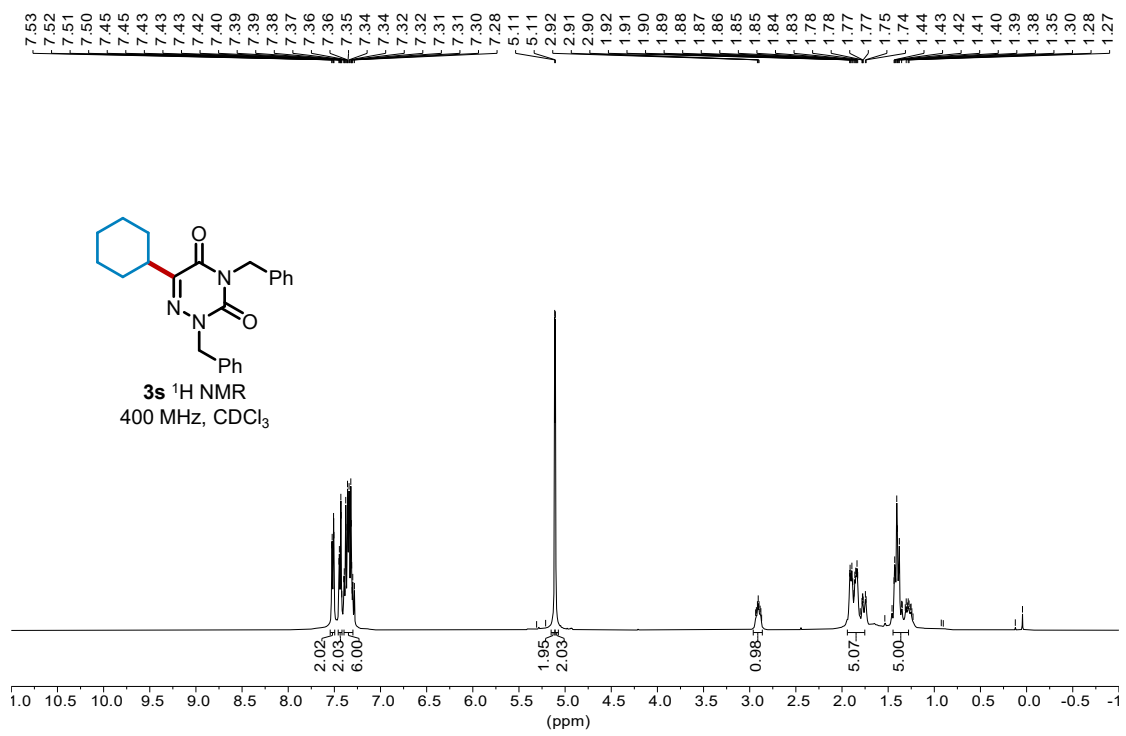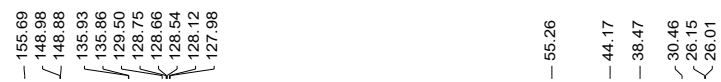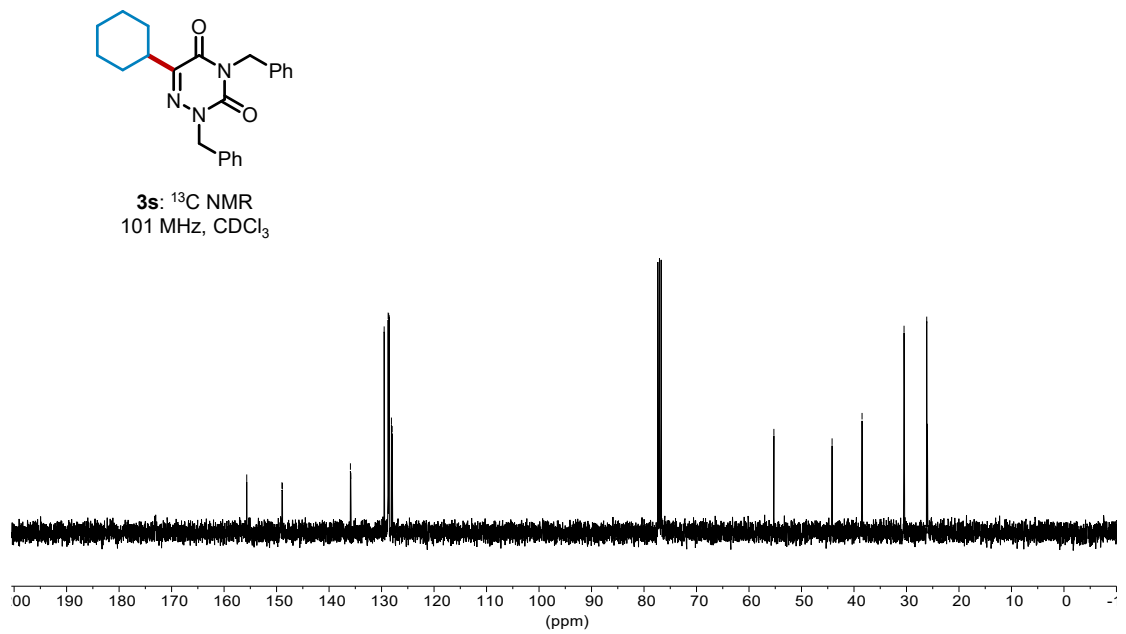

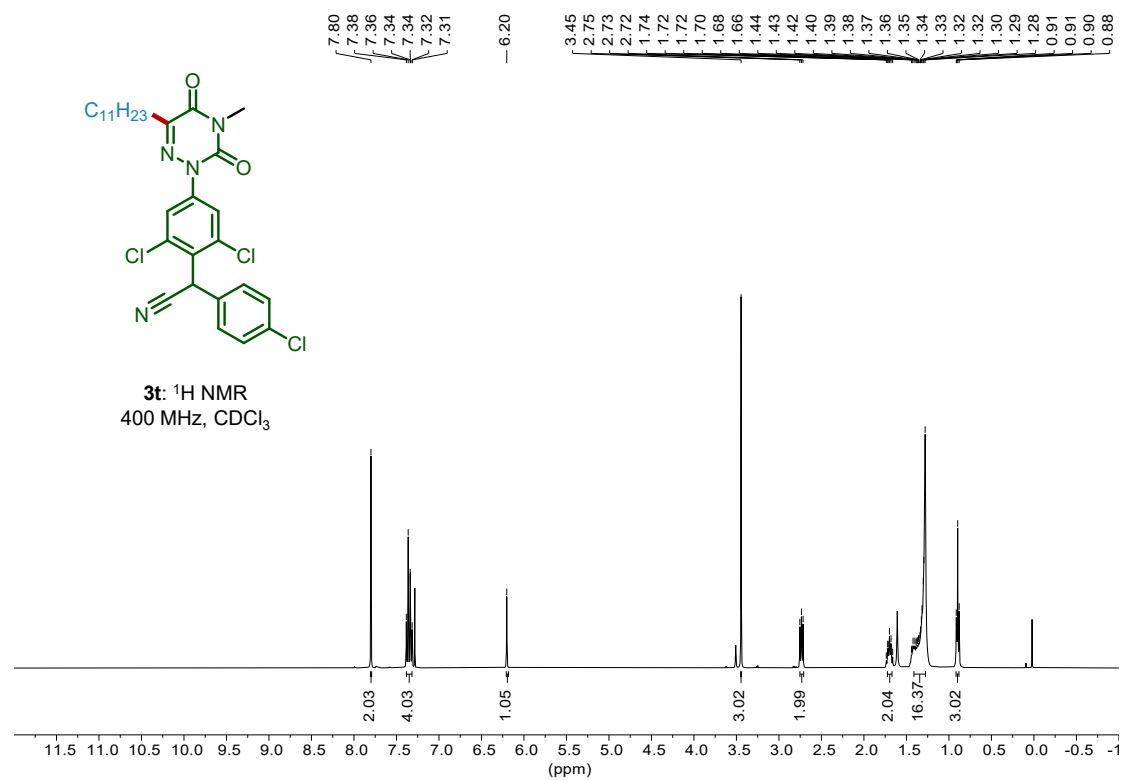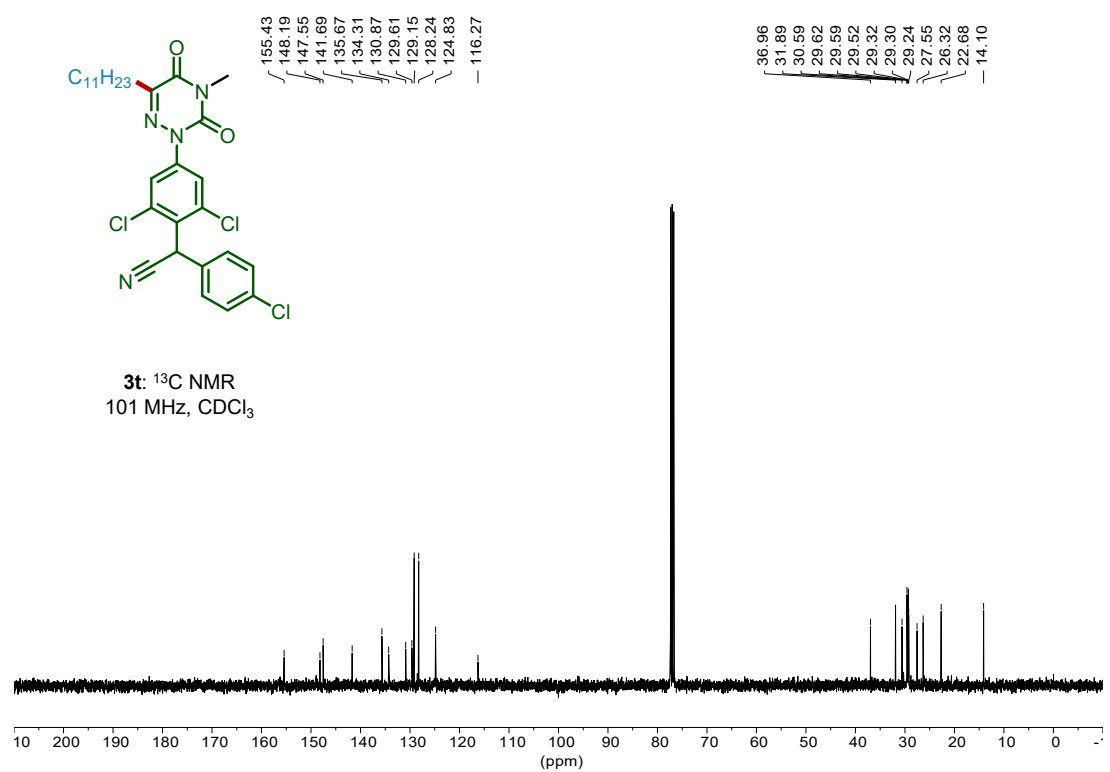

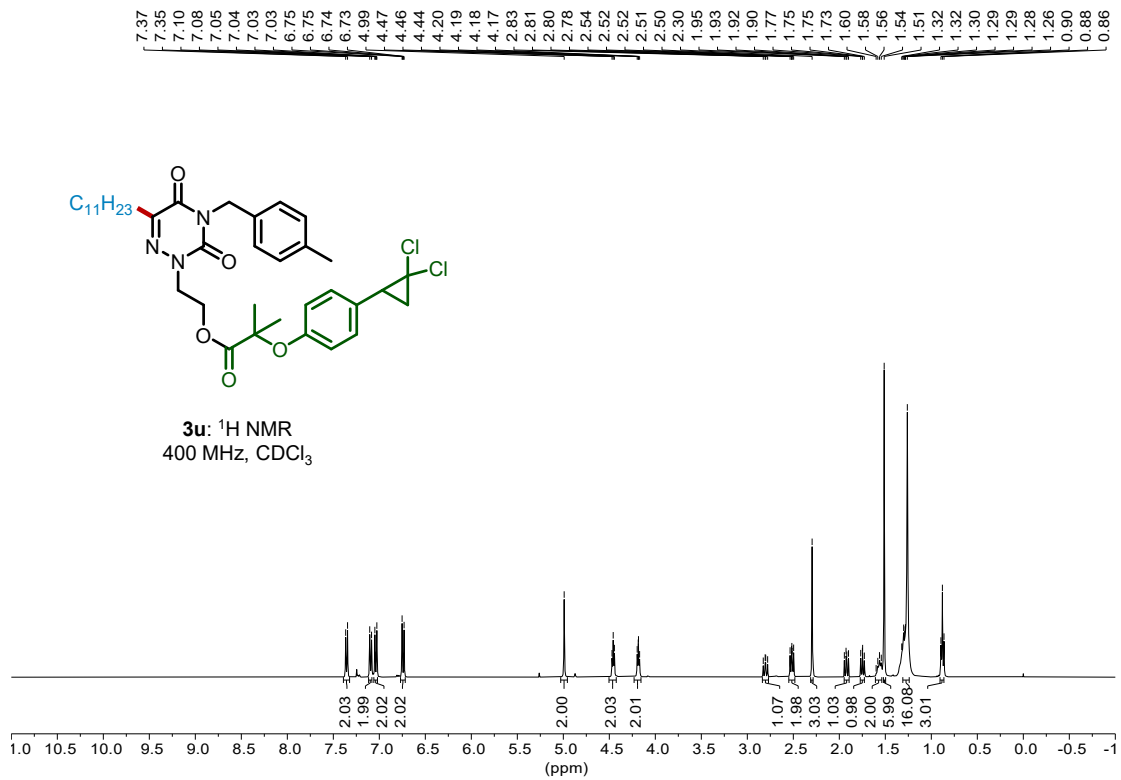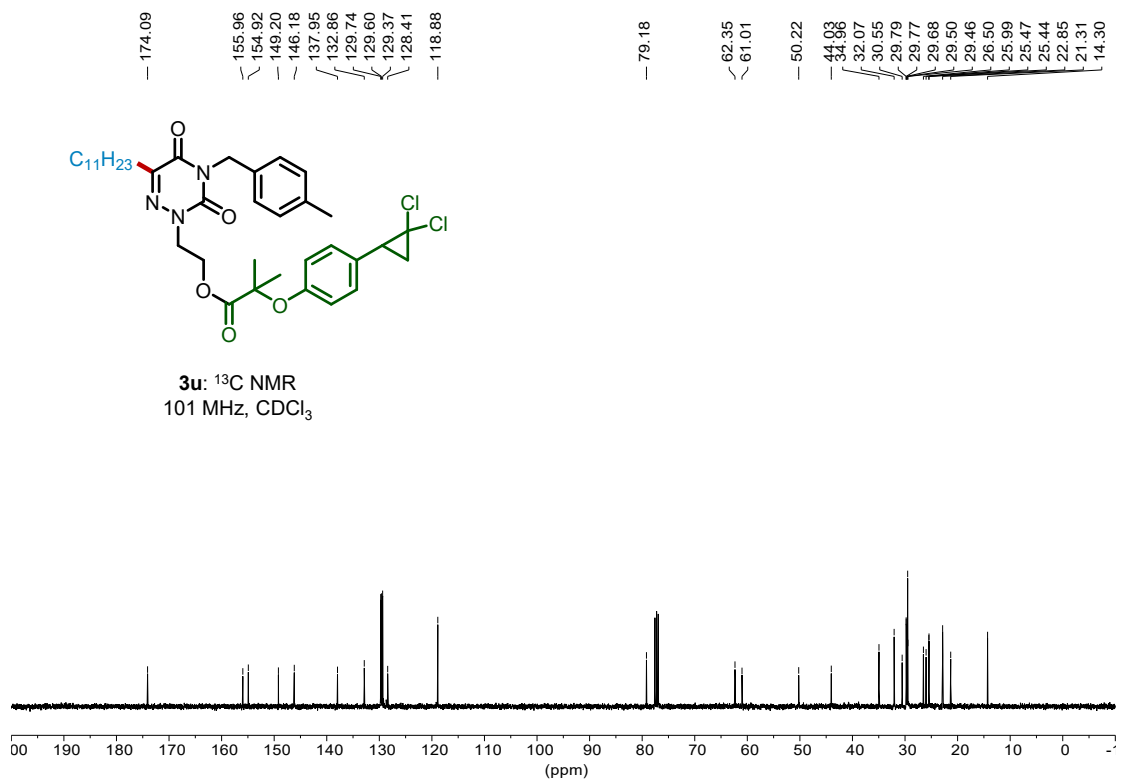

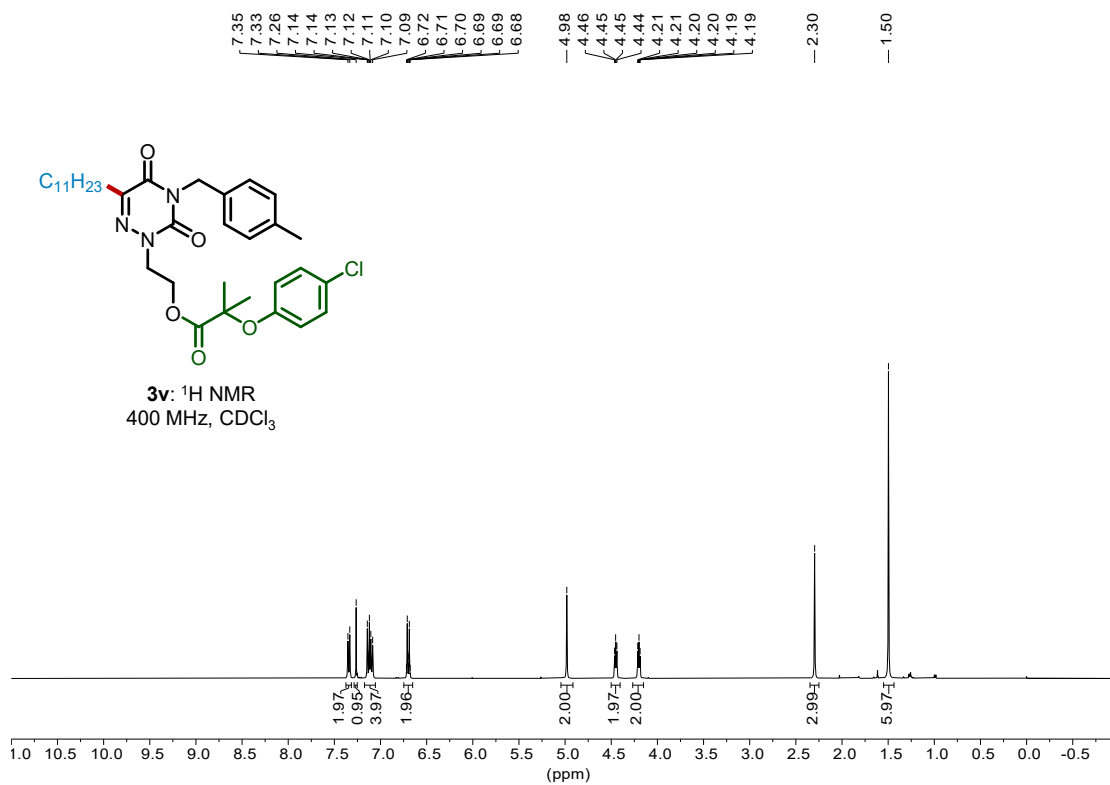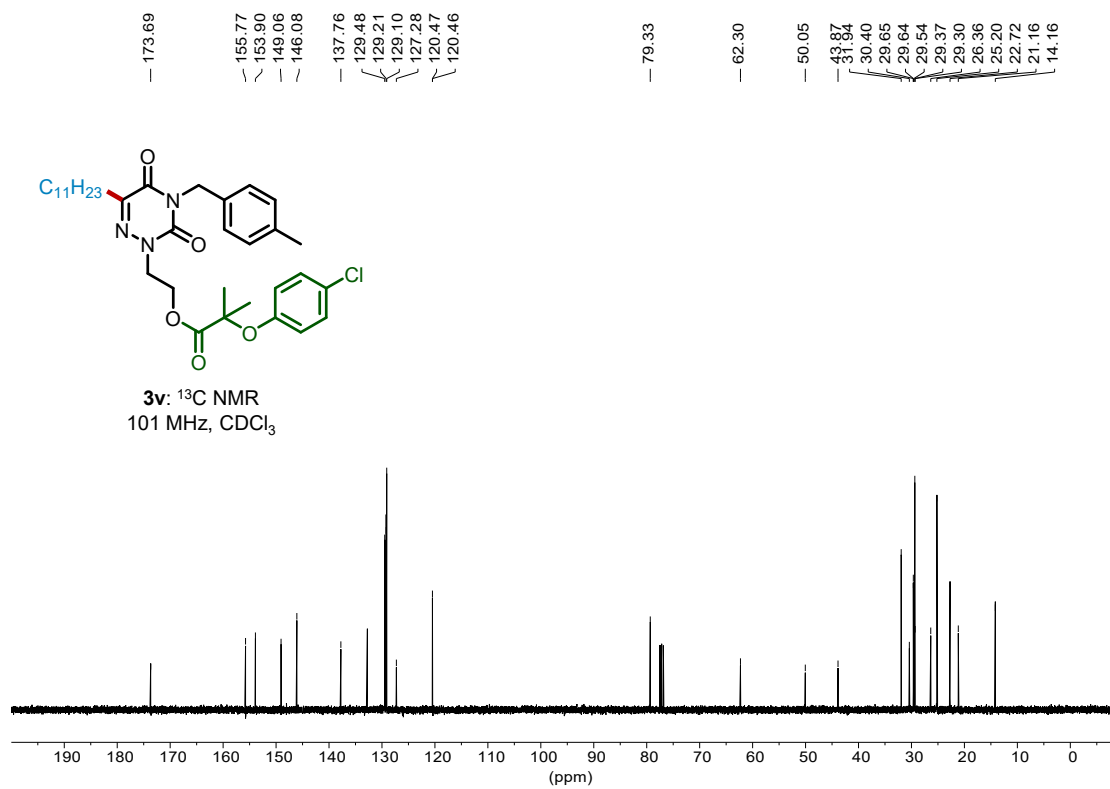

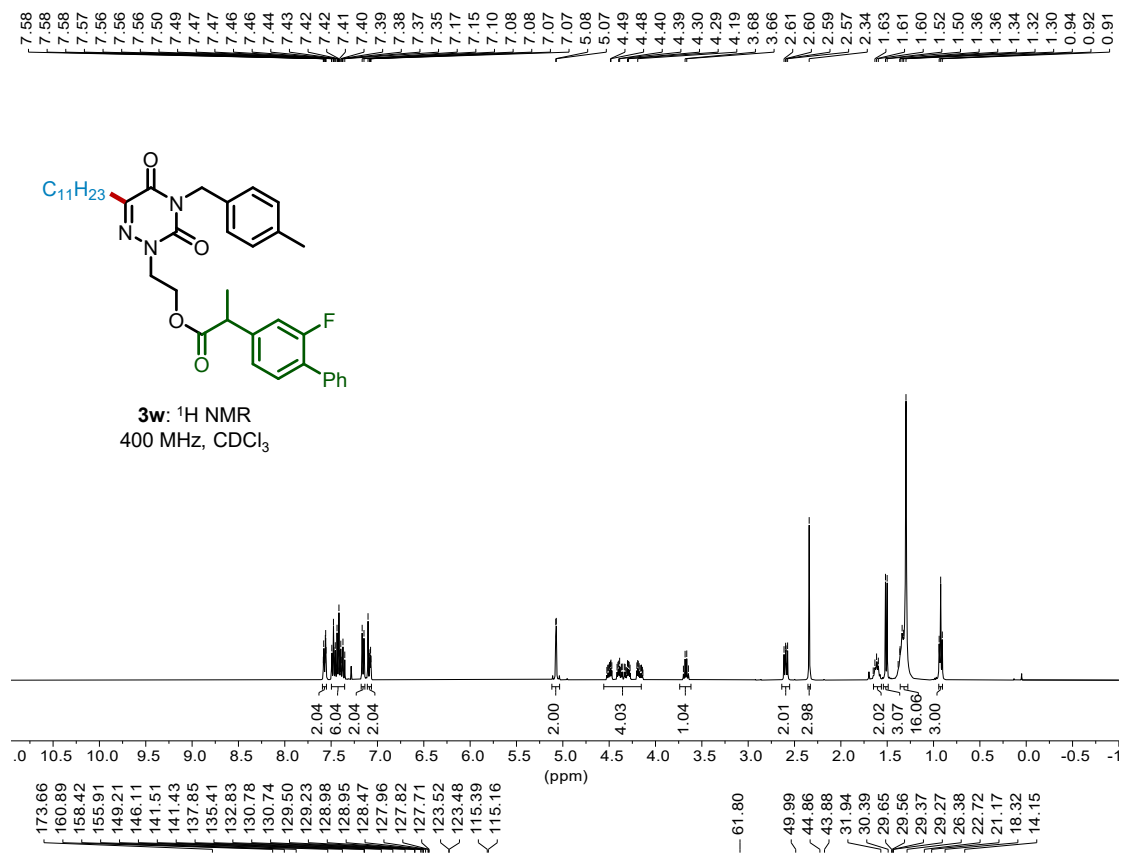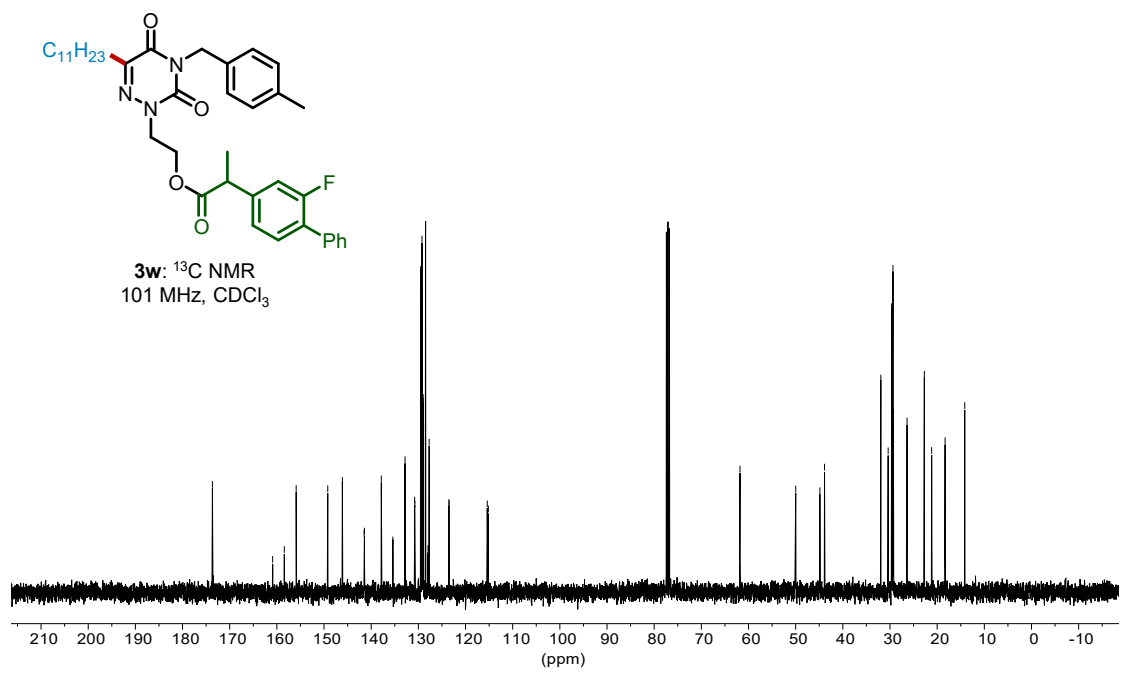

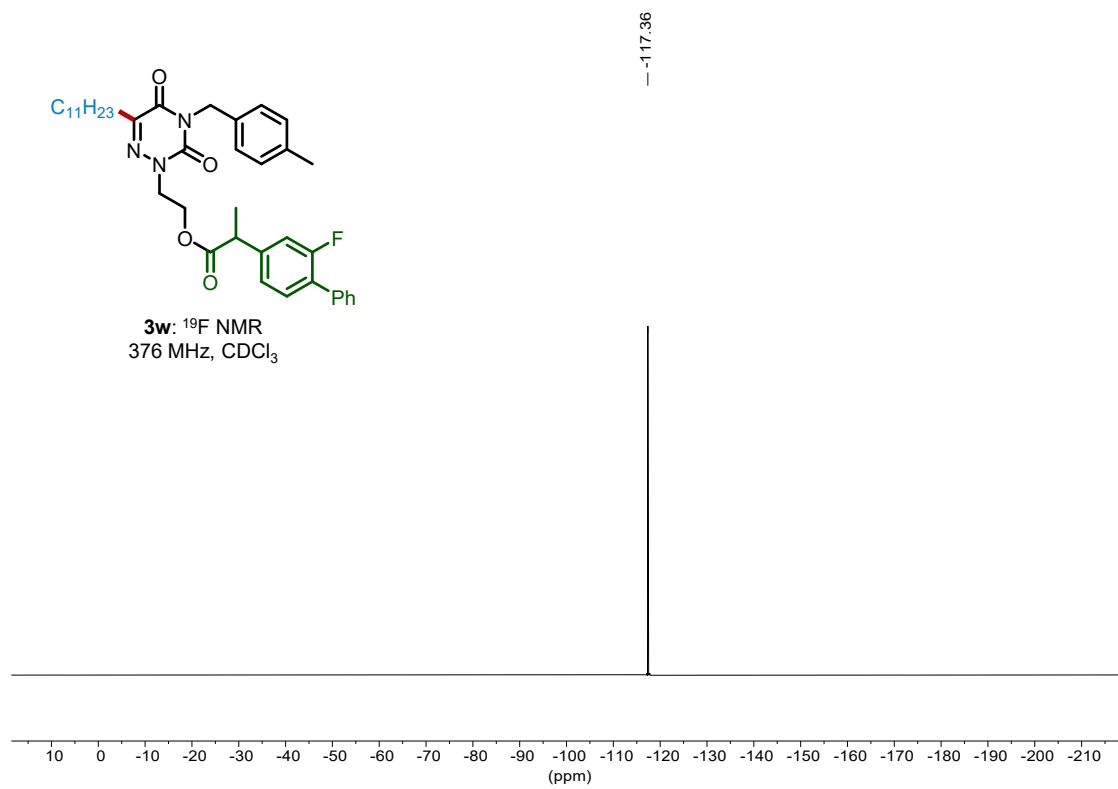



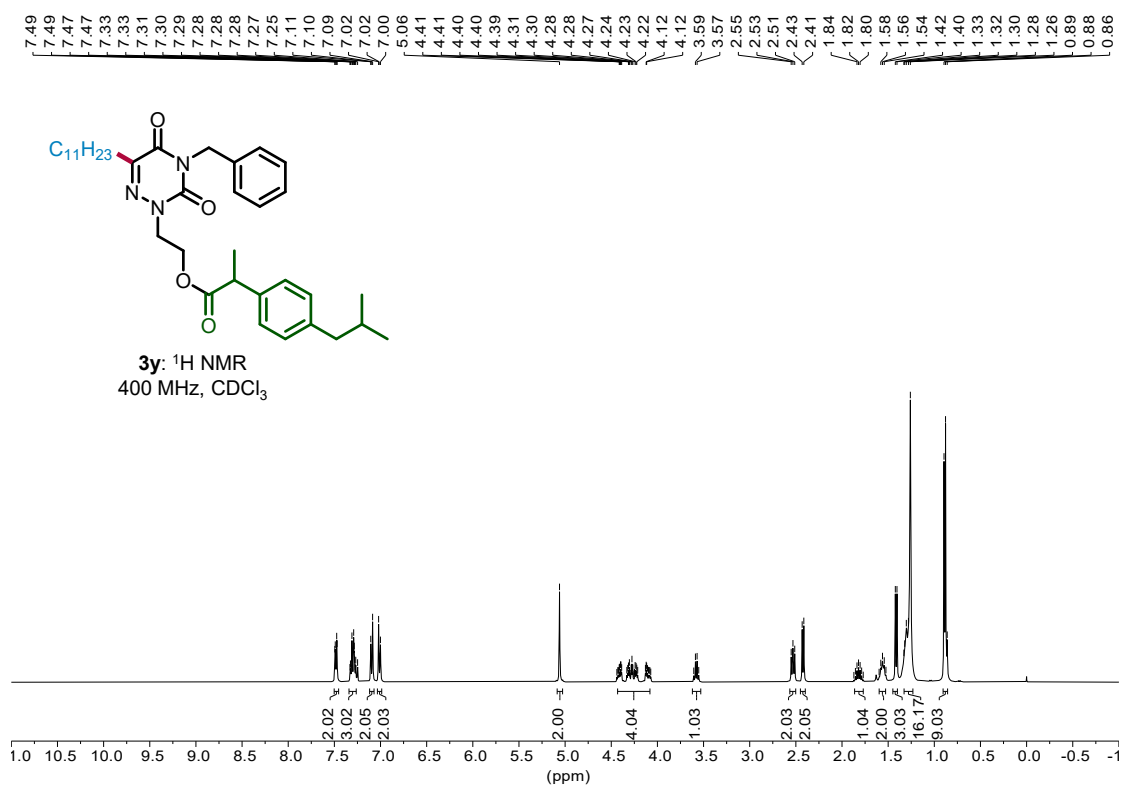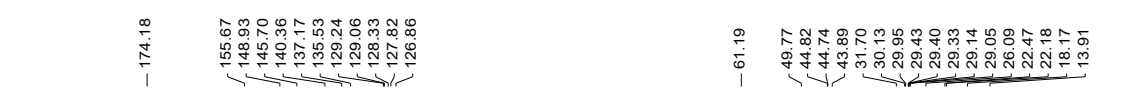



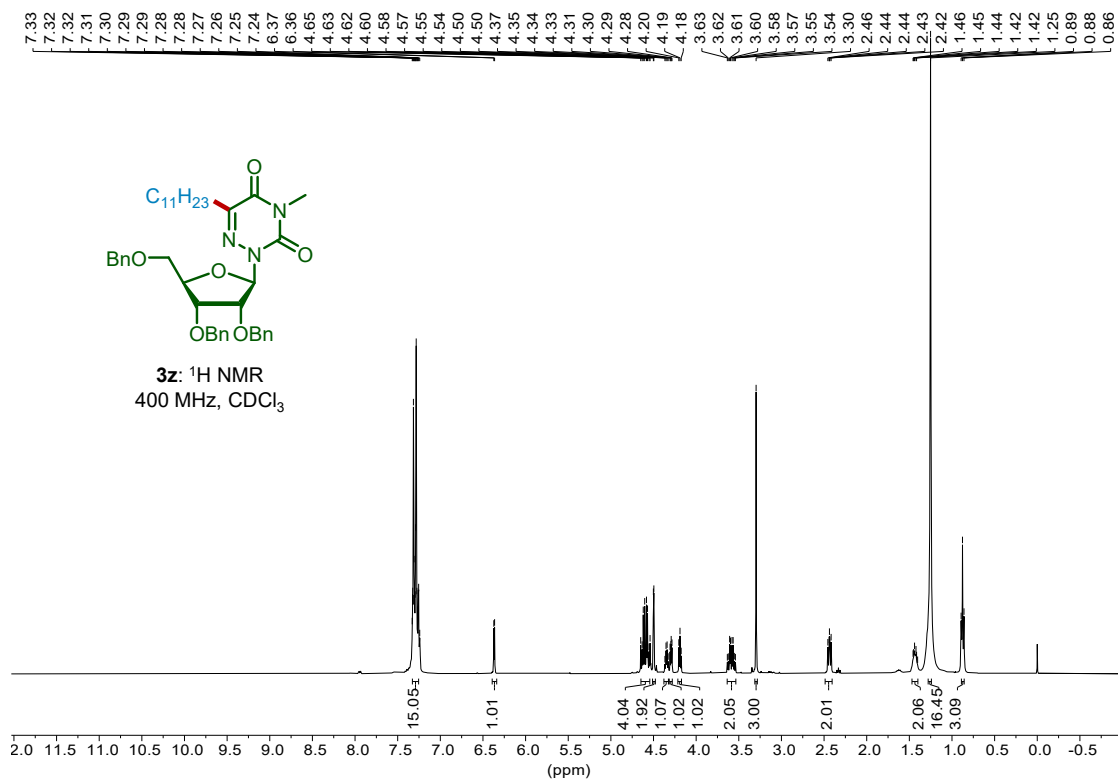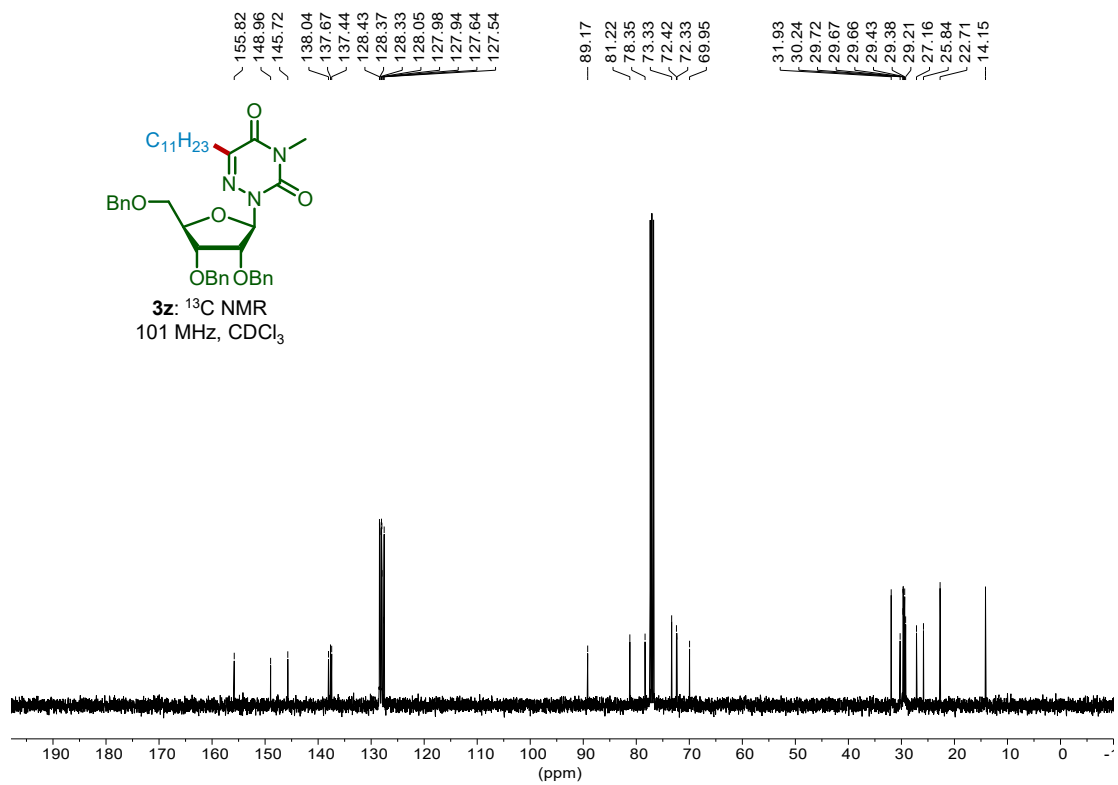

7.84  
7.84  
7.82  
7.82  
7.54  
7.54  
7.52  
7.52  
7.50  
7.50  
7.36  
7.35  
7.34  
7.33  
7.33  
7.32  
7.31  
7.31  
7.30  
7.28  
3.70  
2.96  
2.94  
2.92  
1.80  
1.78  
1.77  
1.76  
1.76  
1.75  
1.46  
1.45  
1.44  
1.43  
1.42  
1.41  
1.37  
1.36  
1.35  
1.34  
1.30  
1.30  
1.28  
1.28  
1.27  
1.26  
0.89  
0.88

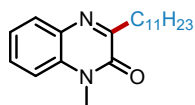

**5a:**  $^1\text{H}$  NMR  
400 MHz,  $\text{CDCl}_3$

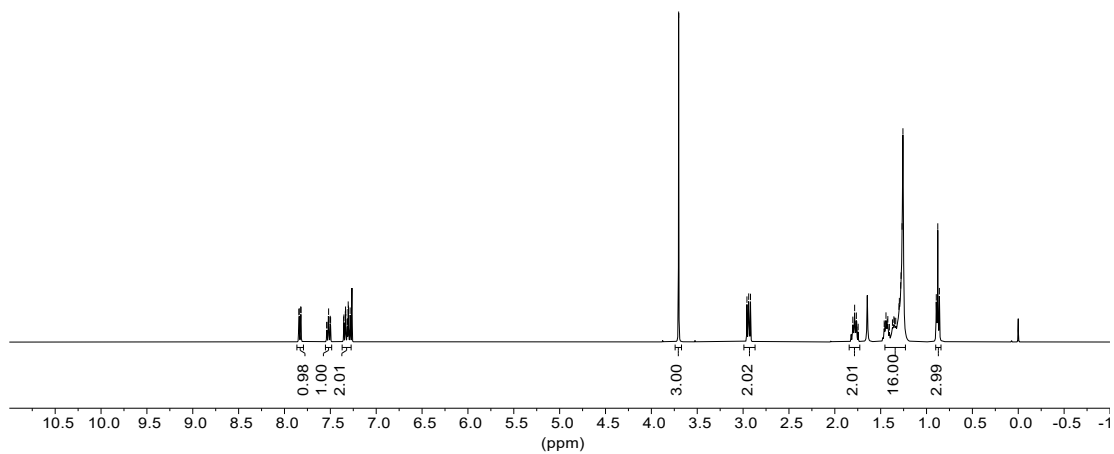

161.43  
154.95  
133.12  
132.77  
129.63  
129.47  
123.50  
113.53  
34.40  
31.92  
29.65  
29.62  
29.57  
29.49  
29.35  
29.02  
26.88  
22.69  
14.11

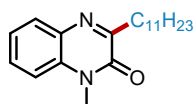

**5a:**  $^{13}\text{C}$  NMR  
101 MHz,  $\text{CDCl}_3$

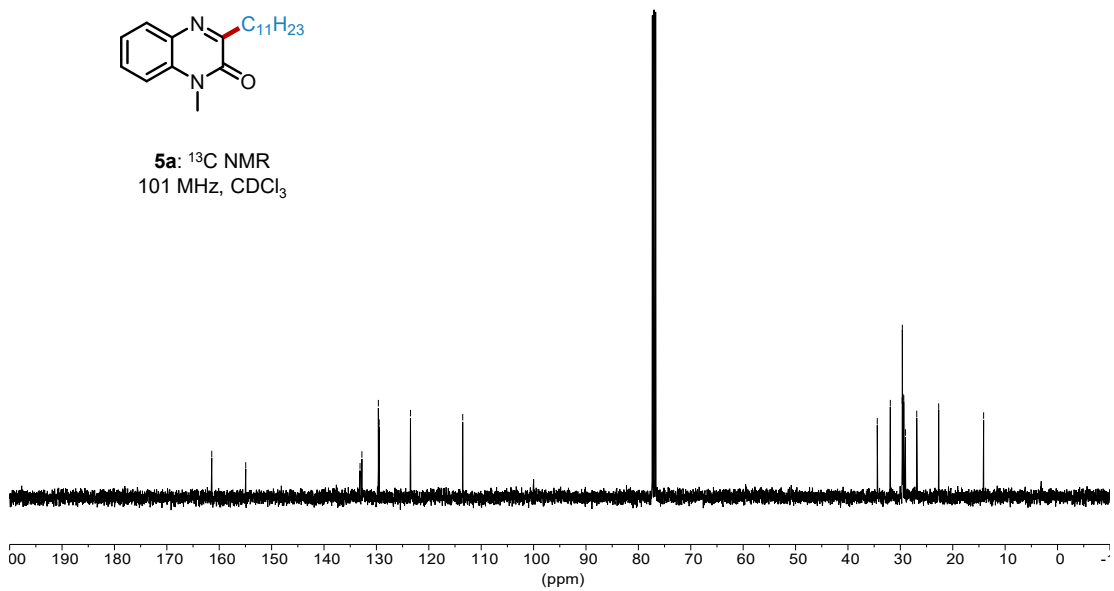

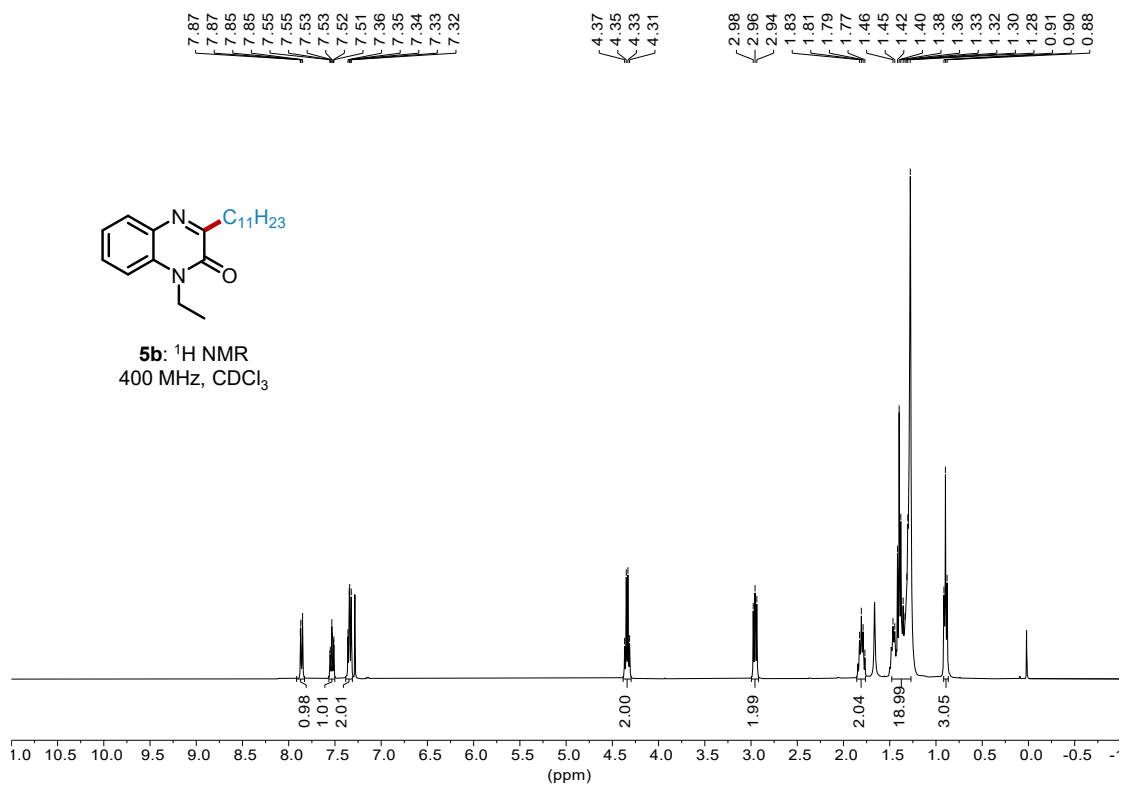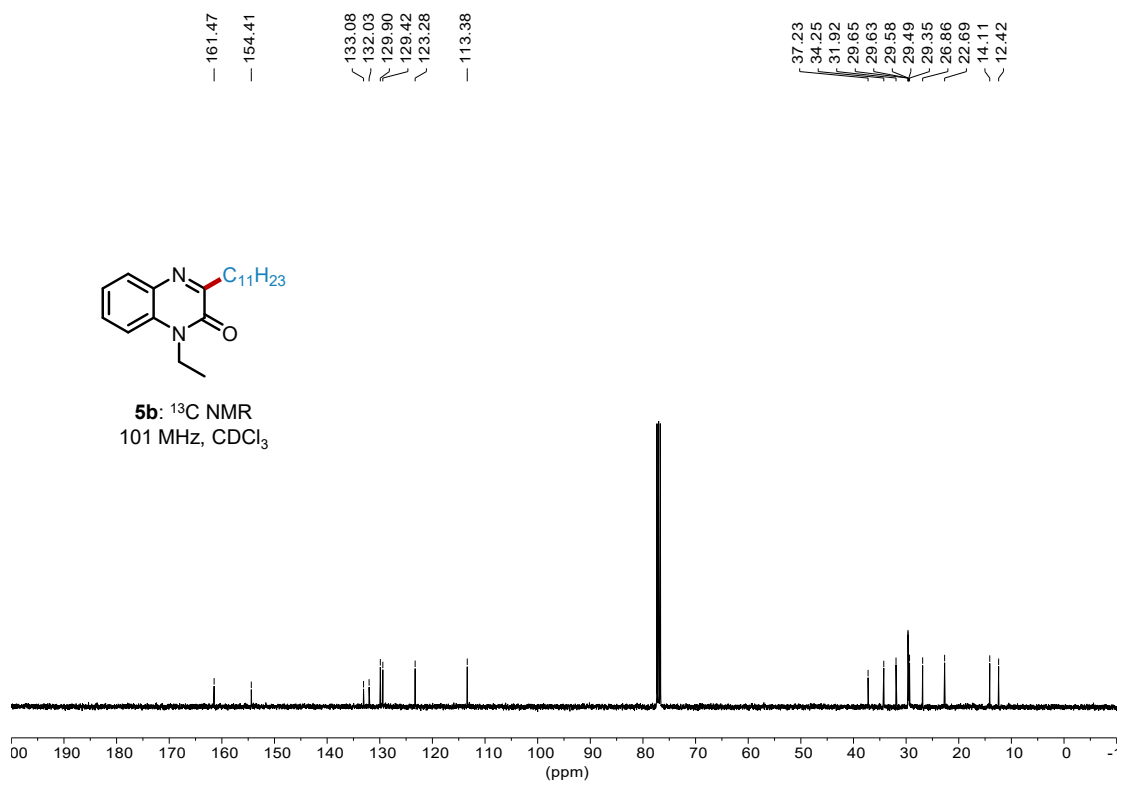

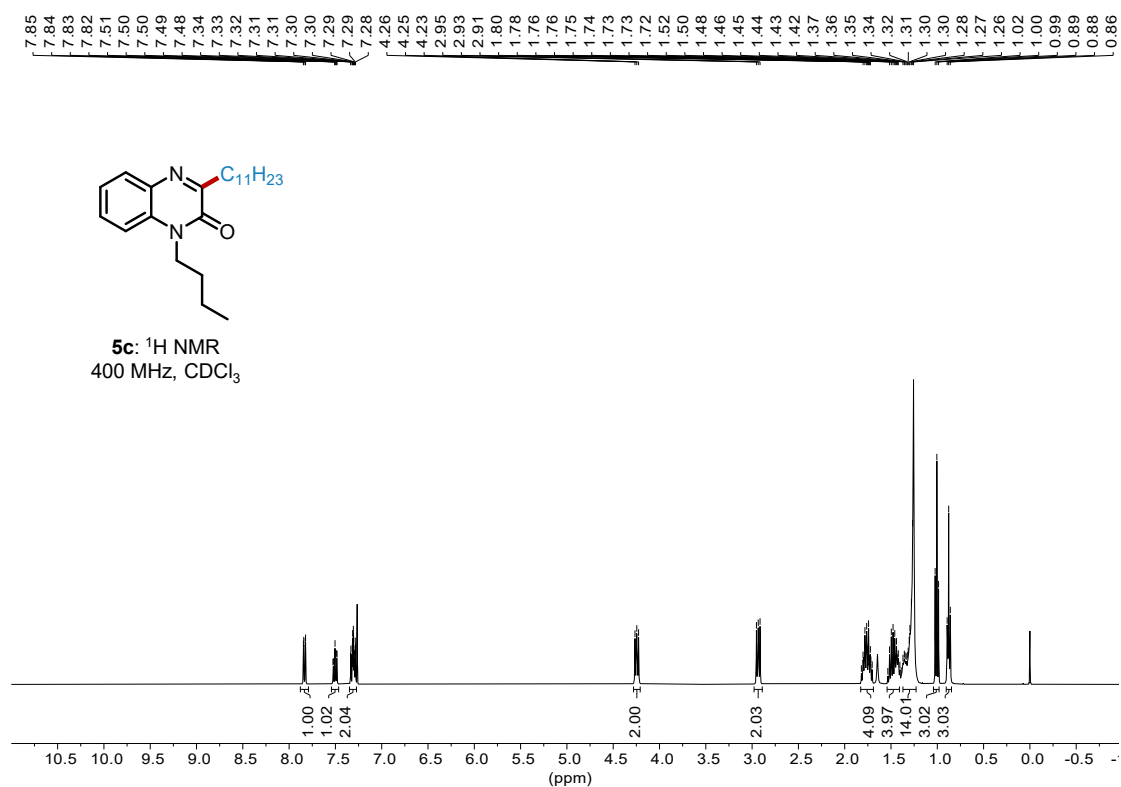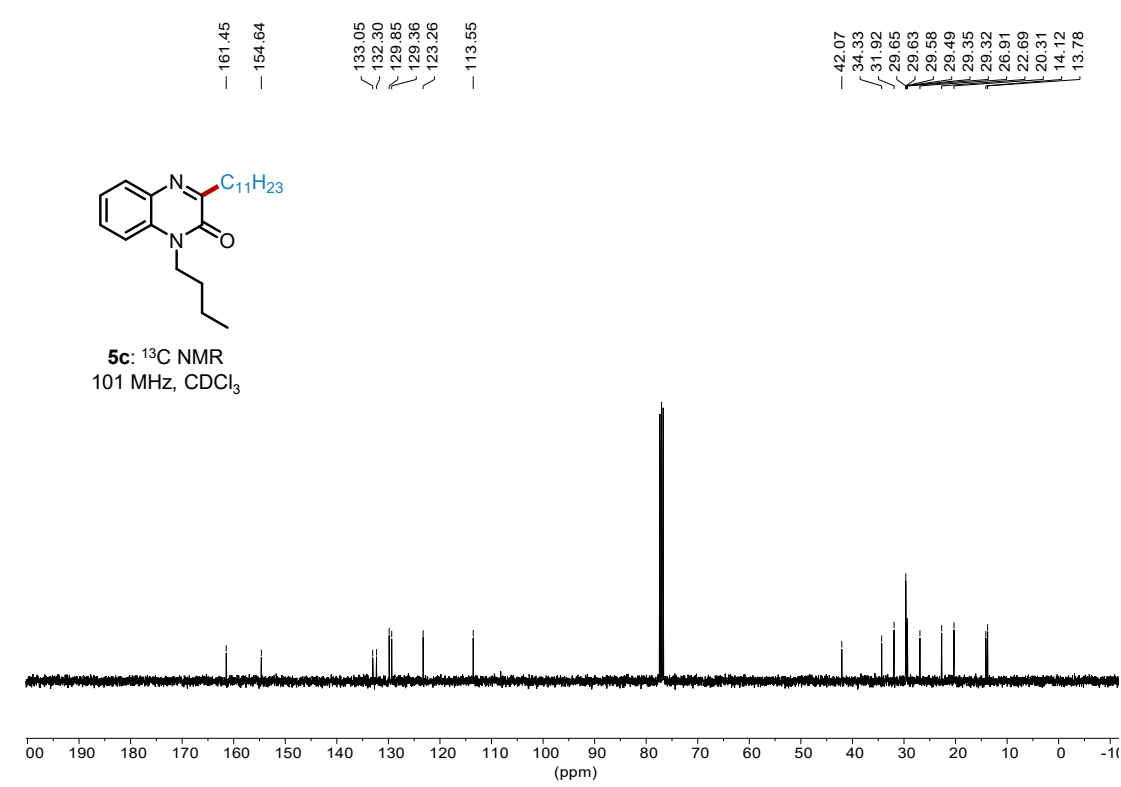

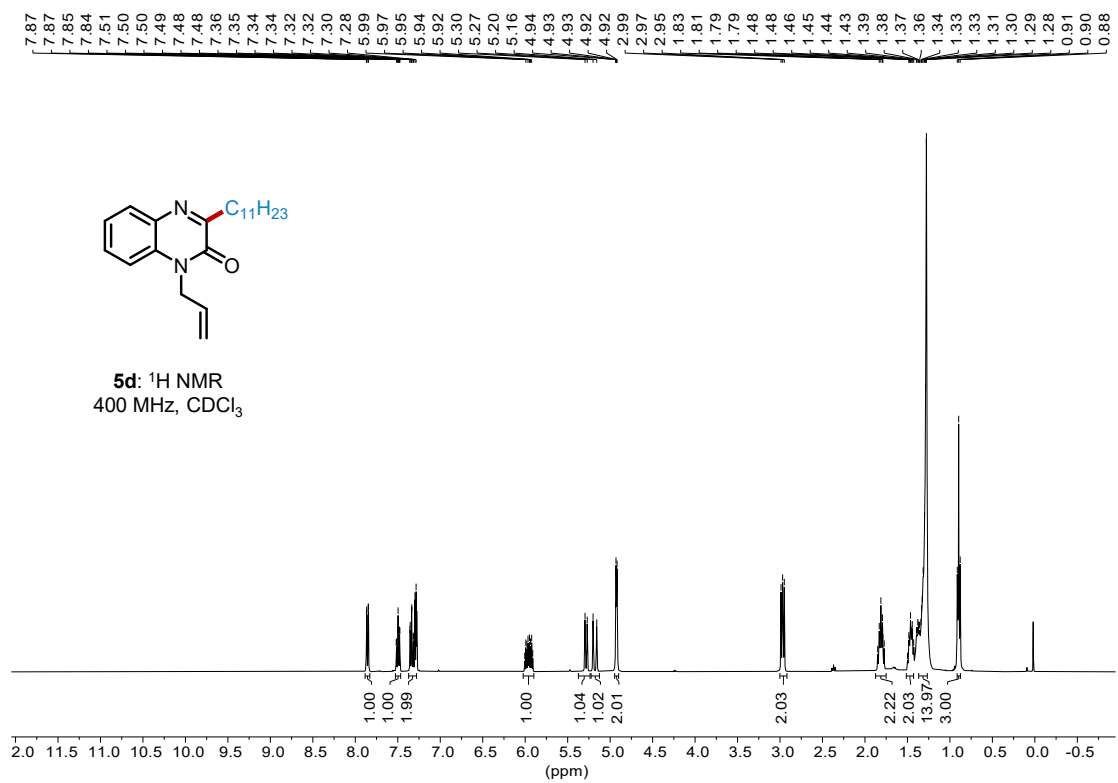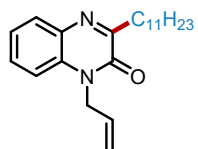

**5d:**  $^1\text{H}$  NMR  
400 MHz,  $\text{CDCl}_3$

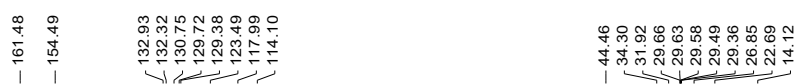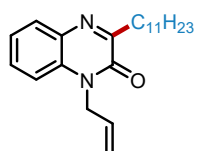

**5d:**  $^{13}\text{C}$  NMR  
101 MHz,  $\text{CDCl}_3$

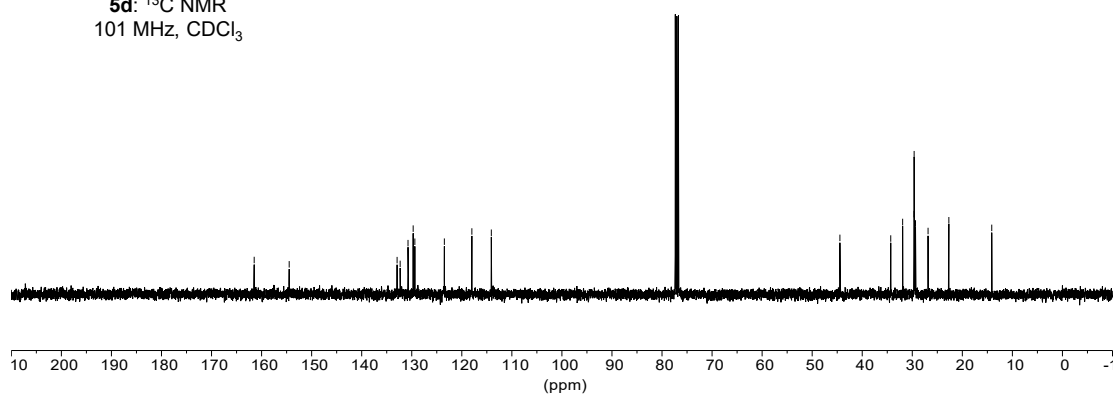

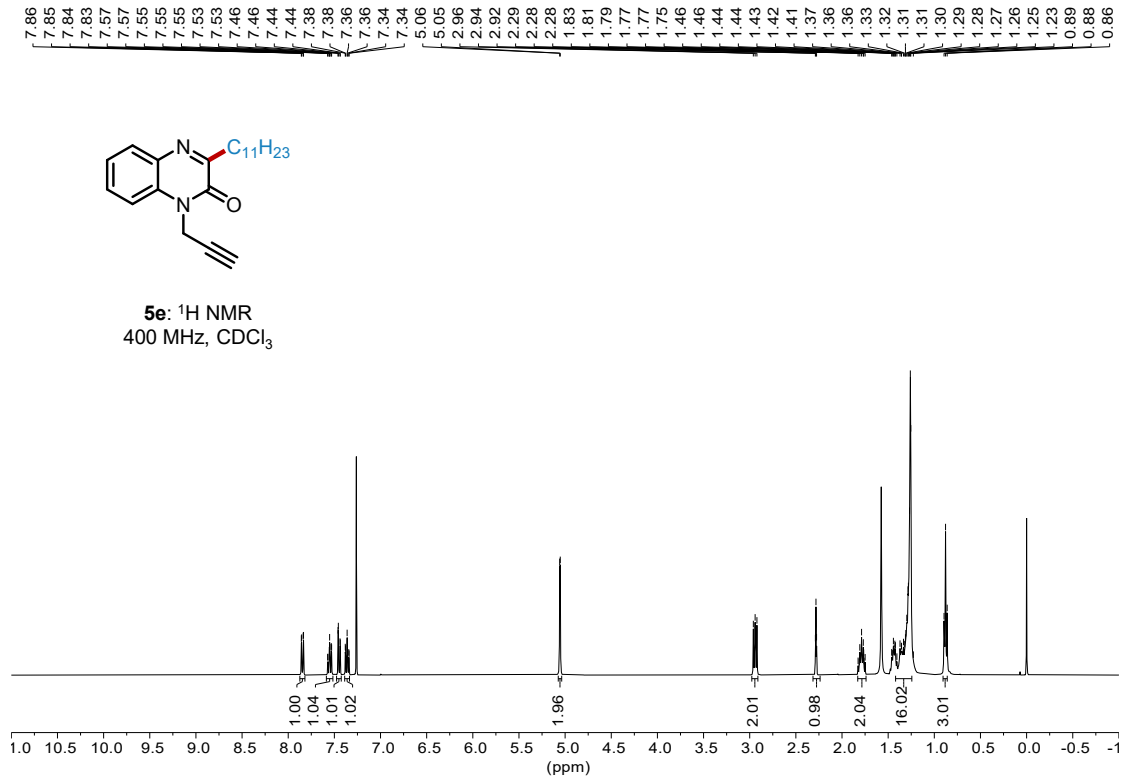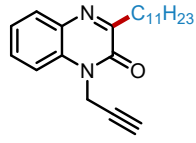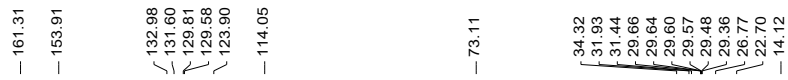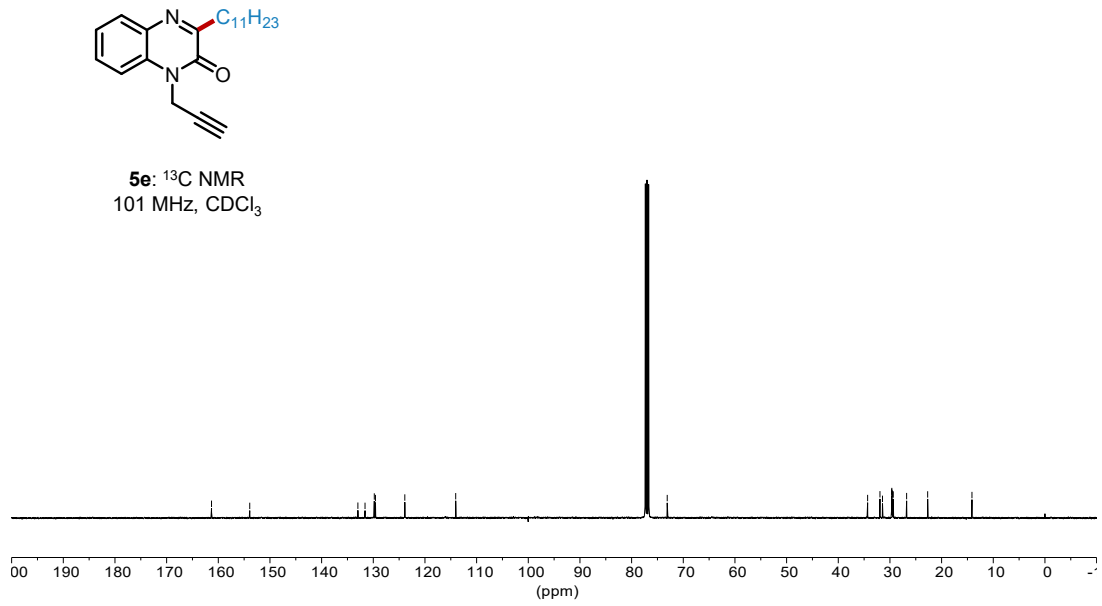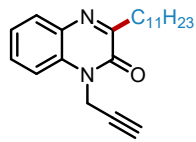

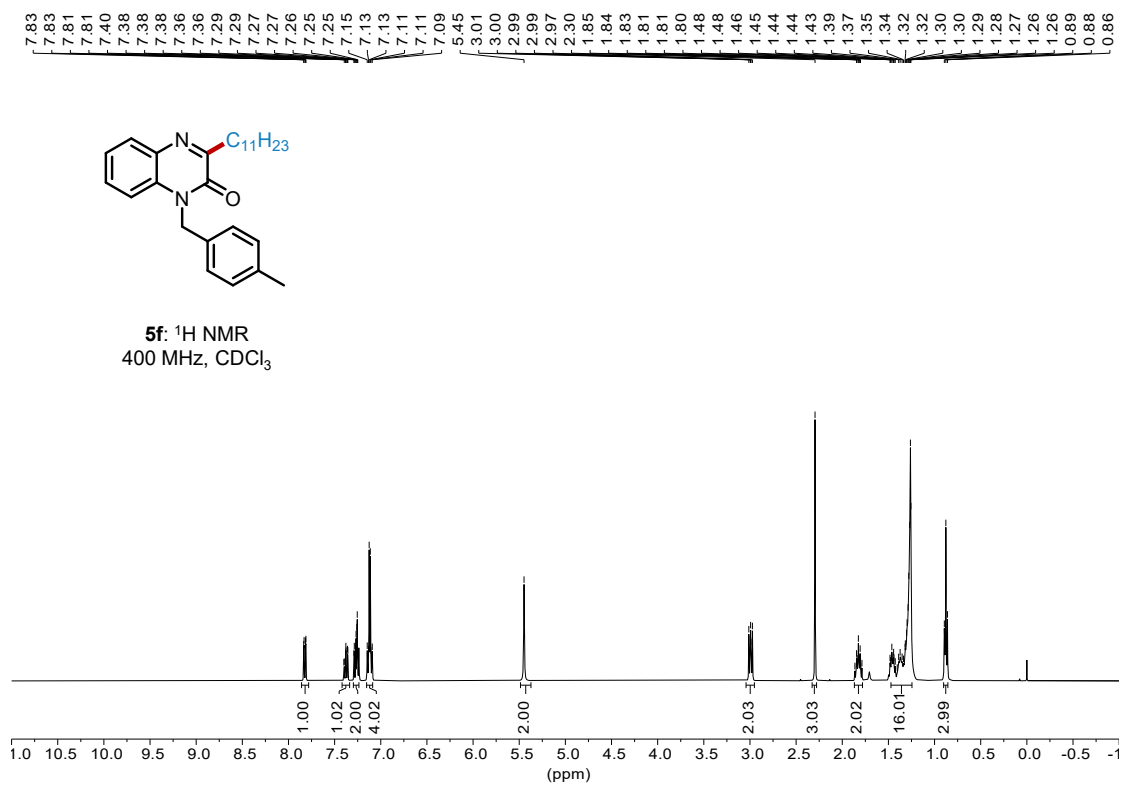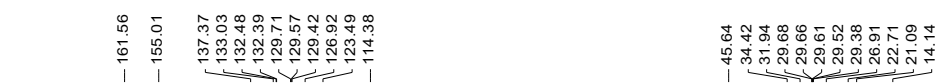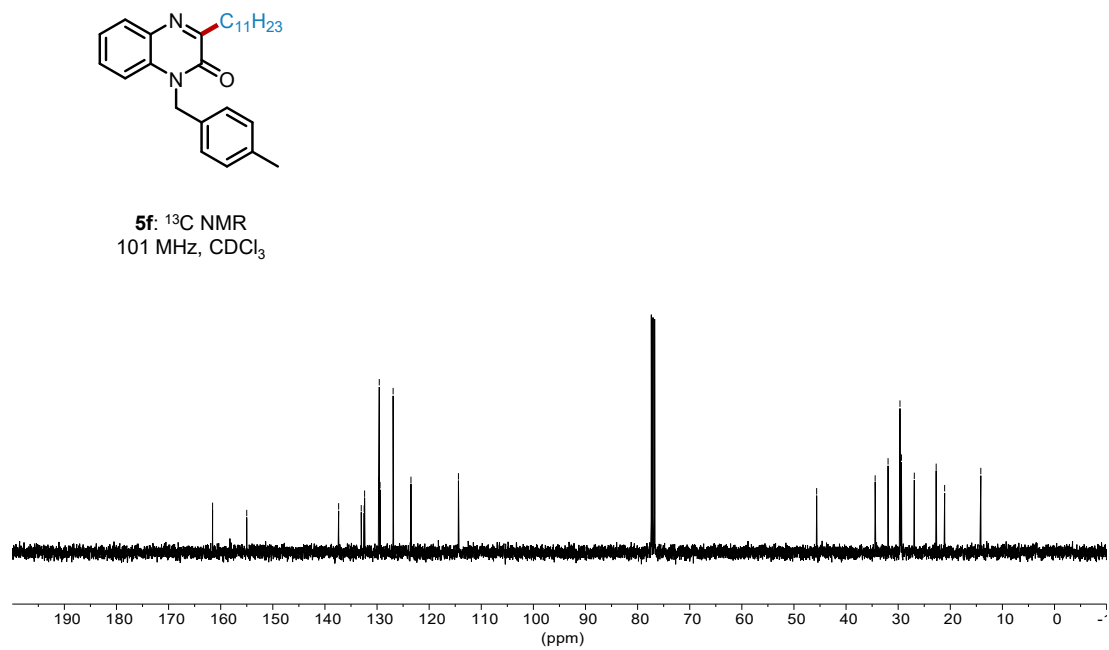

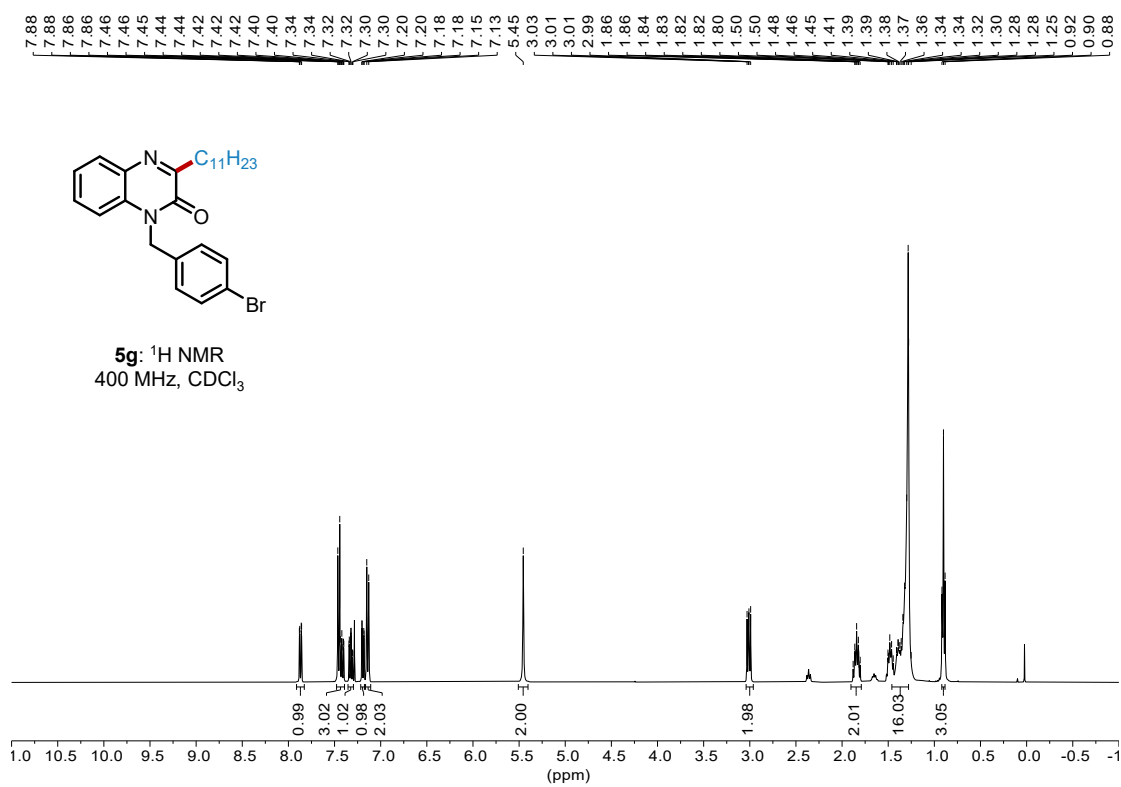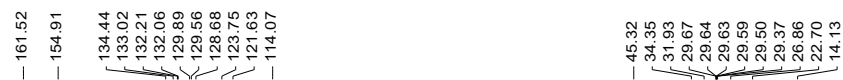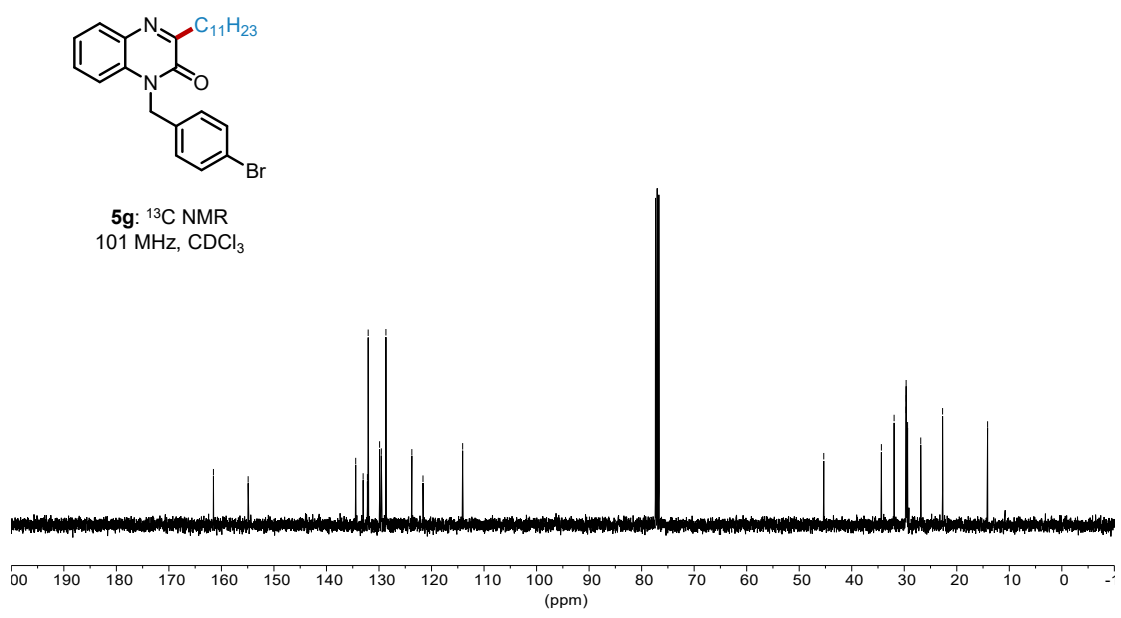





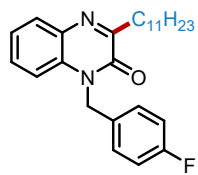

5h: <sup>19</sup>F NMR  
376 MHz, CDCl<sub>3</sub>

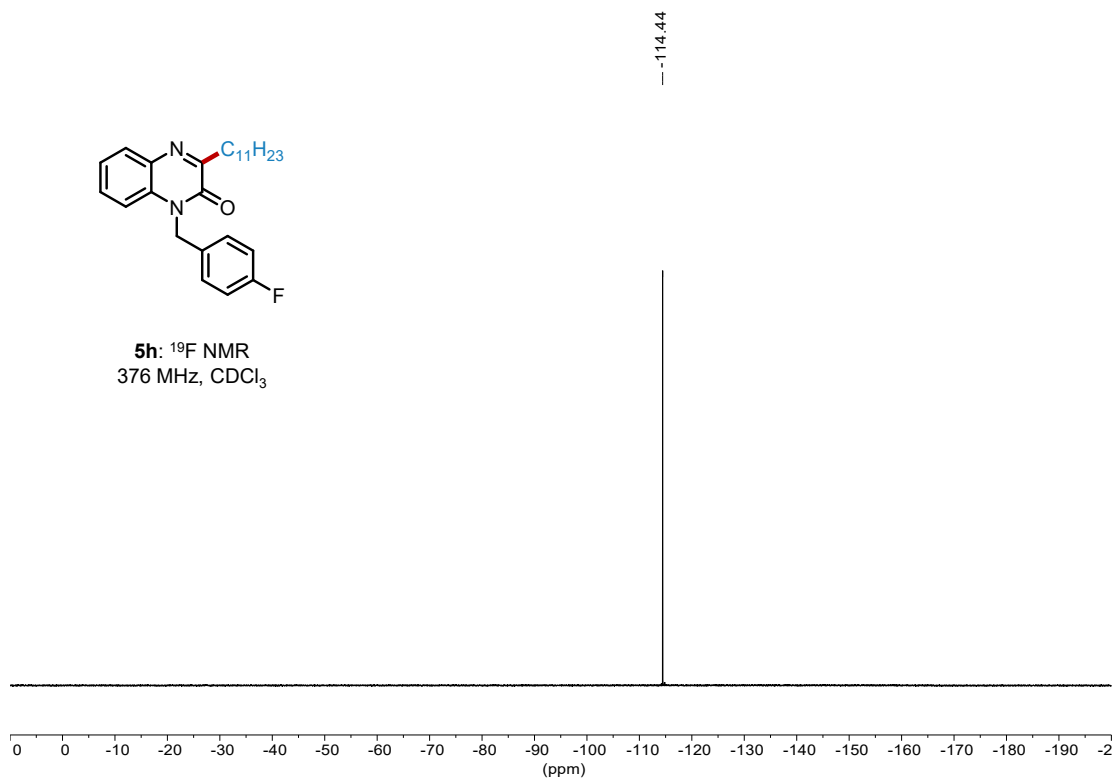

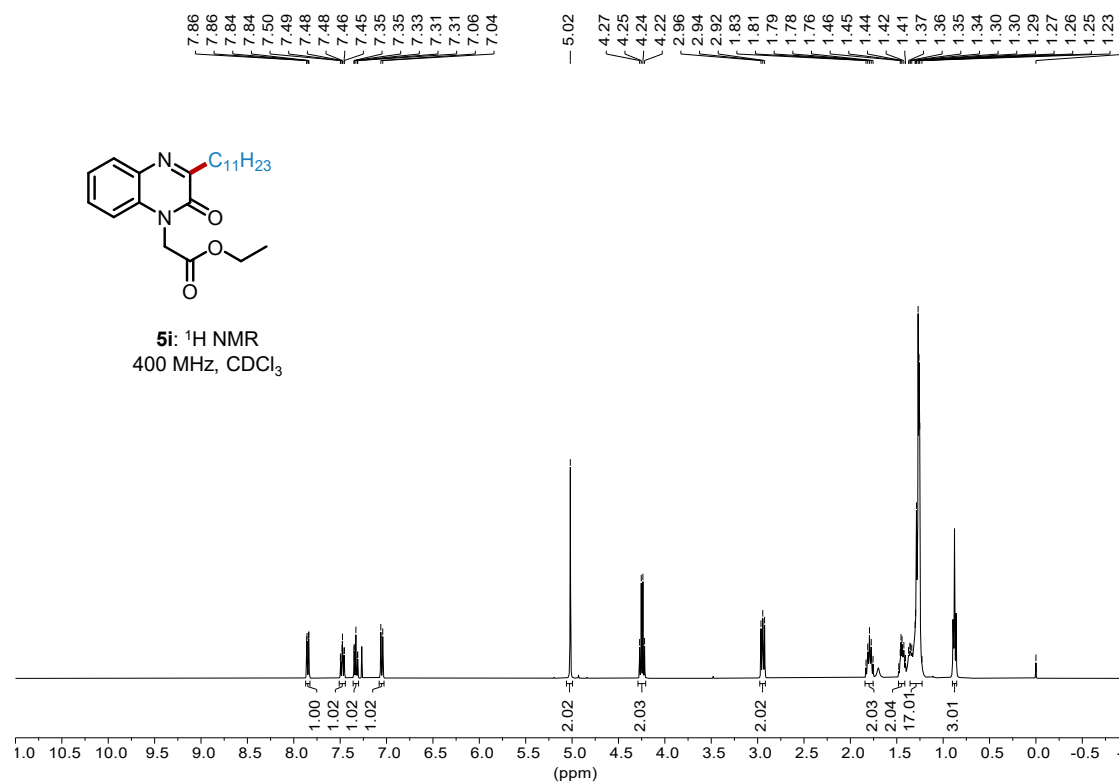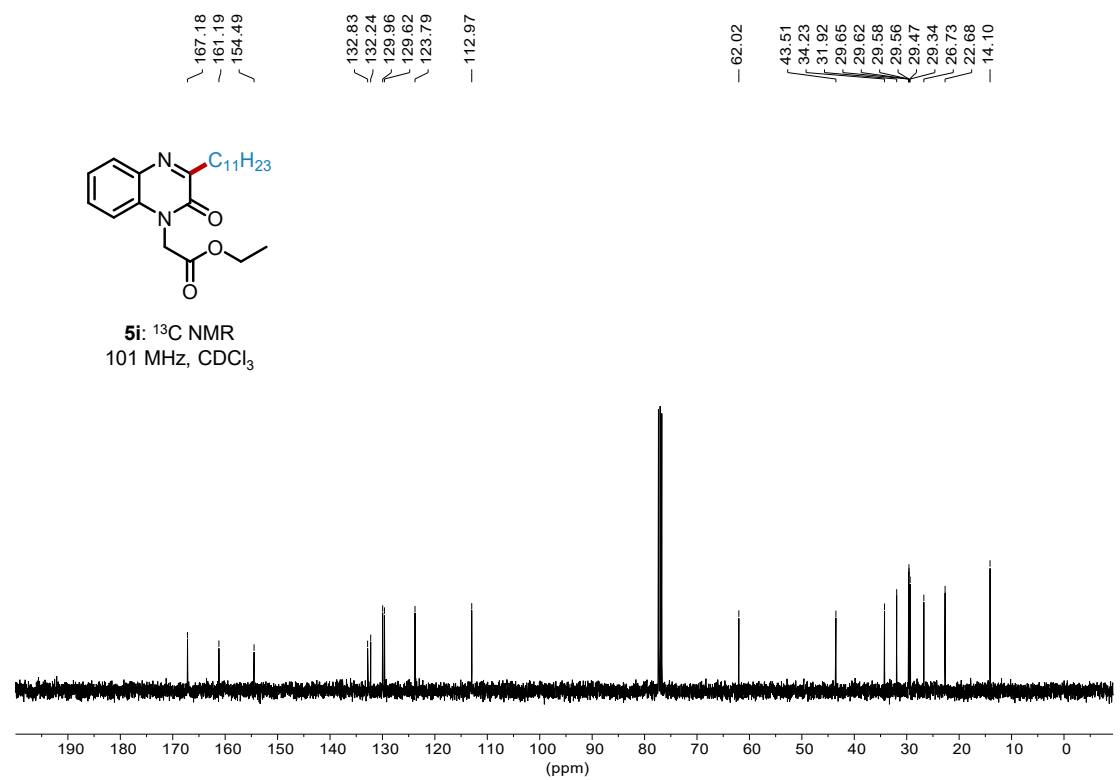

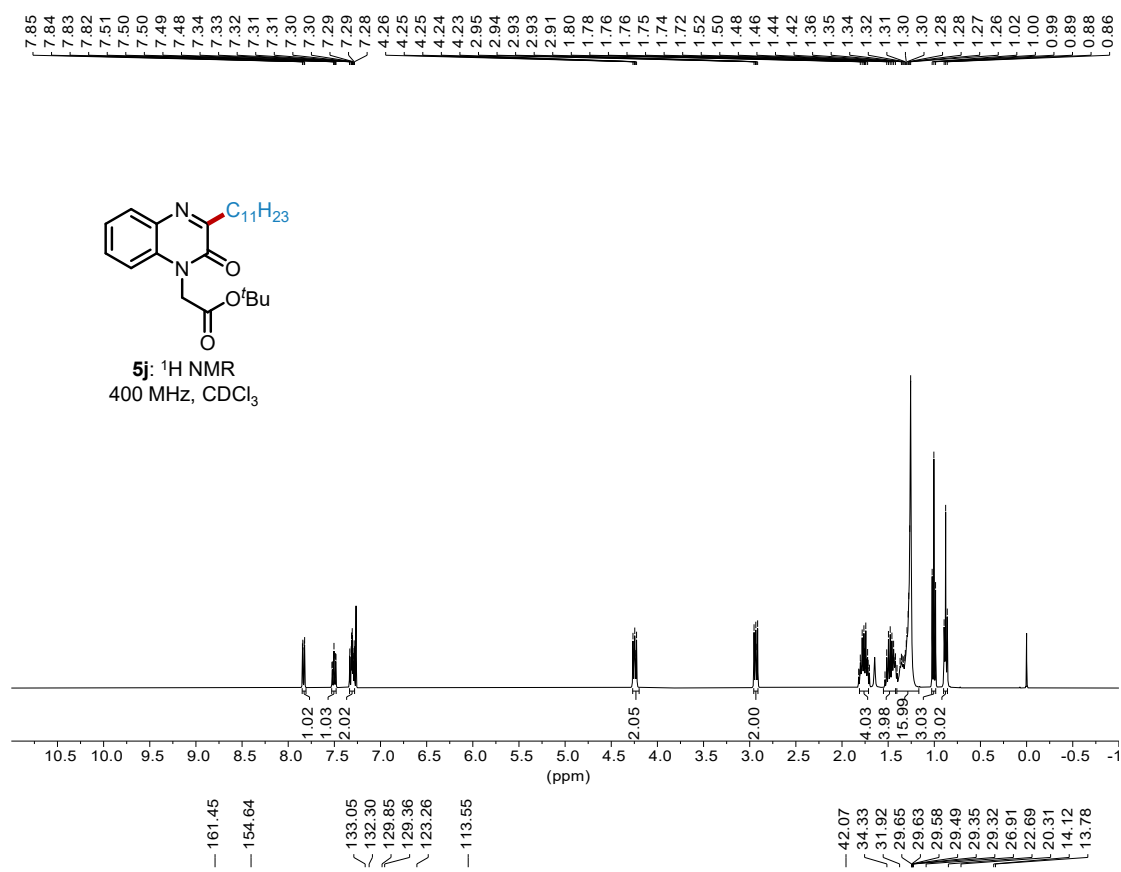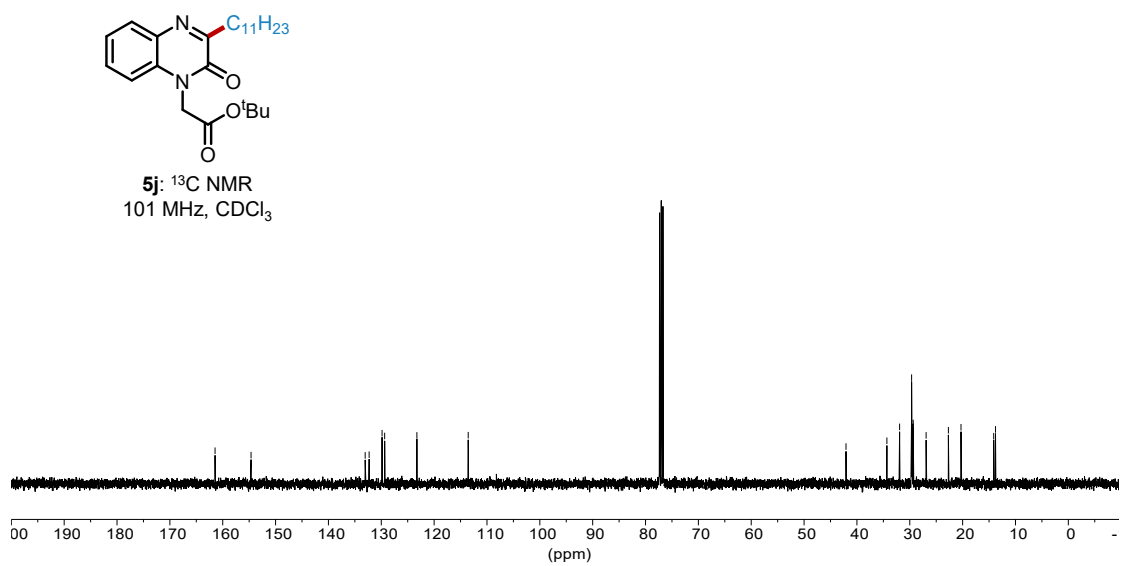

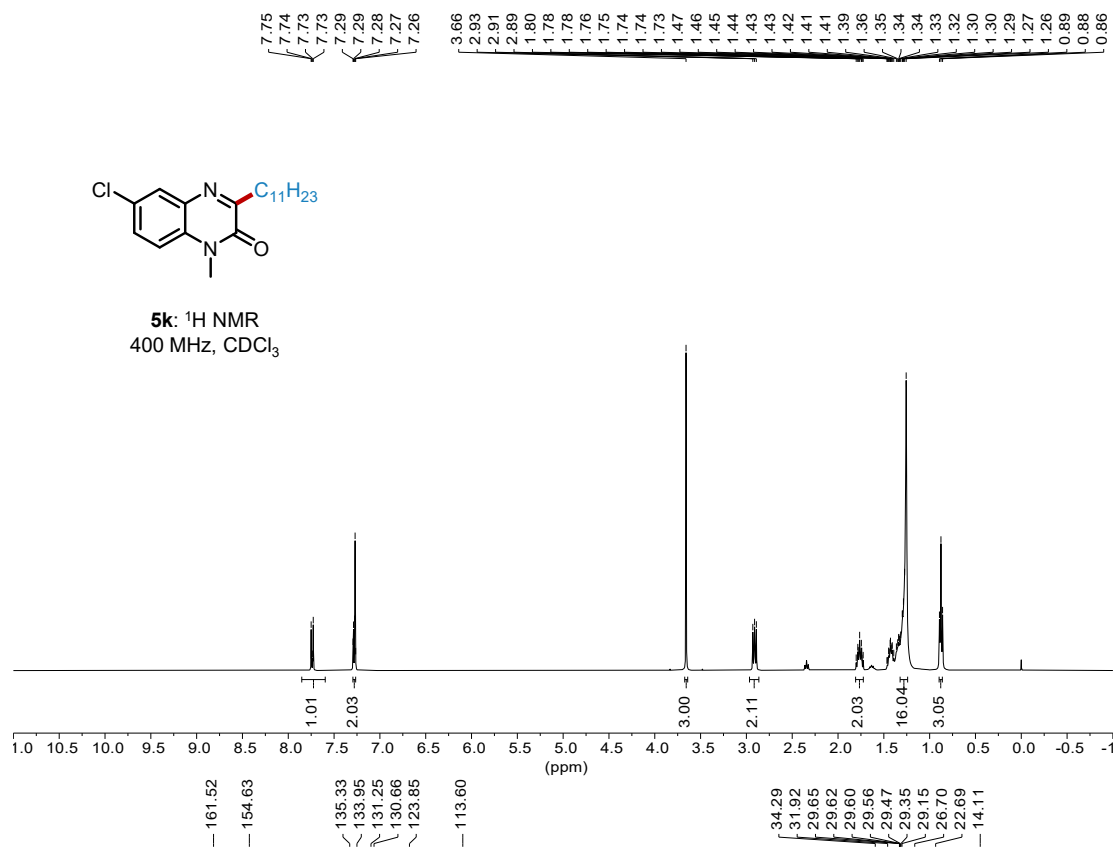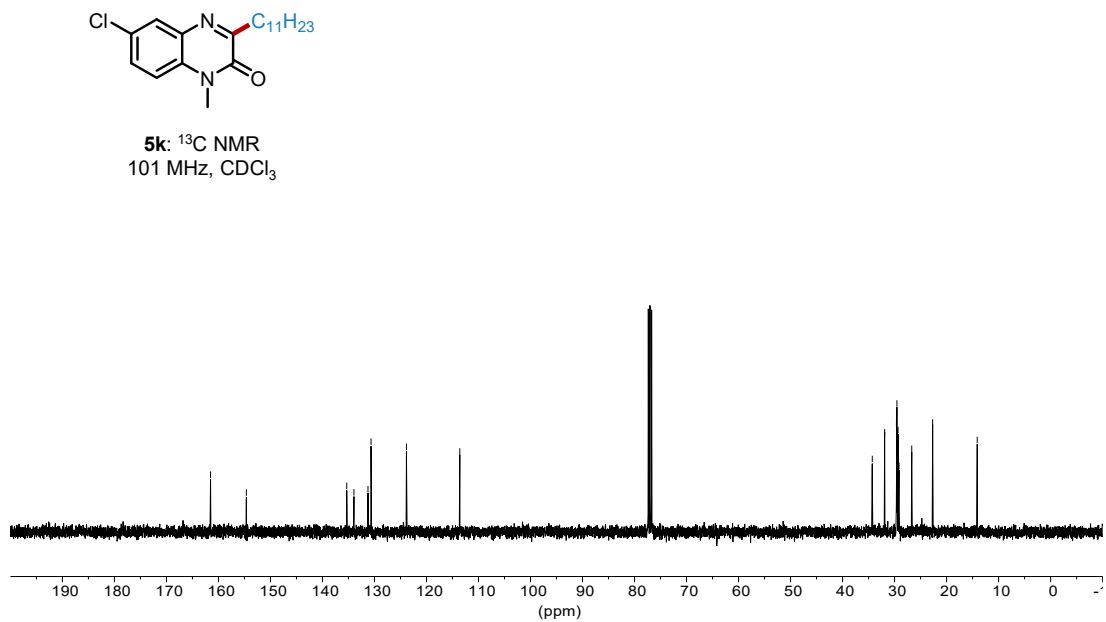

8.14  
8.13  
7.76  
7.75  
7.74  
7.73  
7.38  
7.36  
3.71  
2.96  
2.94  
2.92  
1.81  
1.80  
1.80  
1.79  
1.78  
1.76  
1.76  
1.75  
1.75  
1.74  
1.46  
1.45  
1.44  
1.43  
1.43  
1.42  
1.42  
1.41  
1.41  
1.39  
1.37  
1.36  
1.35  
1.35  
1.34  
1.32  
1.32  
1.31  
1.30  
1.29  
1.28  
1.27  
1.26  
0.90  
0.88  
0.86

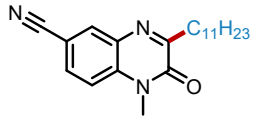

**51:**  $^1\text{H}$  NMR  
400 MHz,  $\text{CDCl}_3$

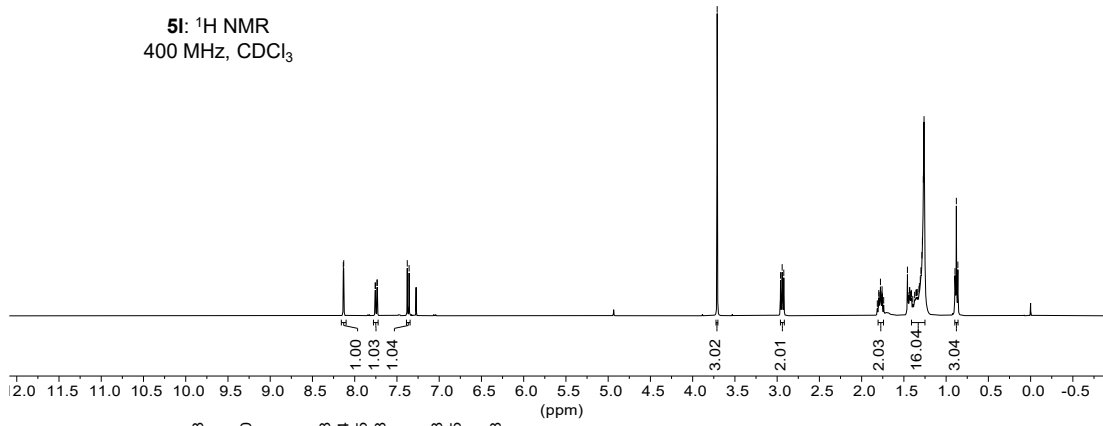

163.68  
154.50  
136.38  
133.94  
132.35  
132.08  
118.08  
114.65  
106.98  
34.23  
31.91  
29.64  
29.61  
29.53  
29.46  
29.44  
29.34  
29.30  
26.39  
22.68  
14.11

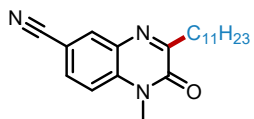

**51:**  $^{13}\text{C}$  NMR  
101 MHz,  $\text{CDCl}_3$

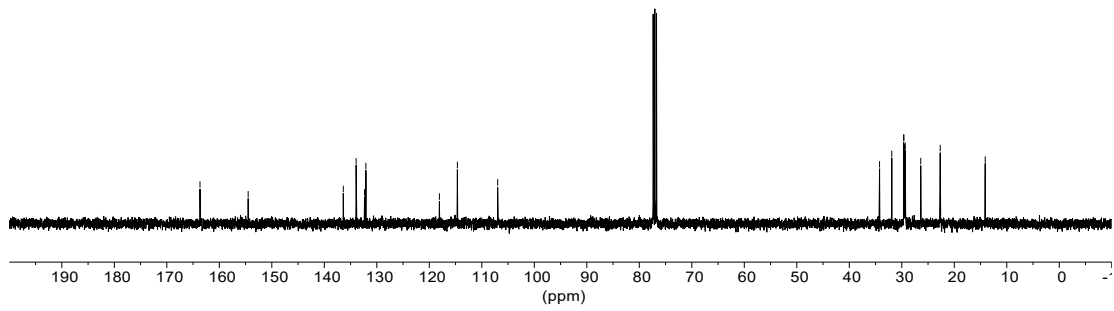

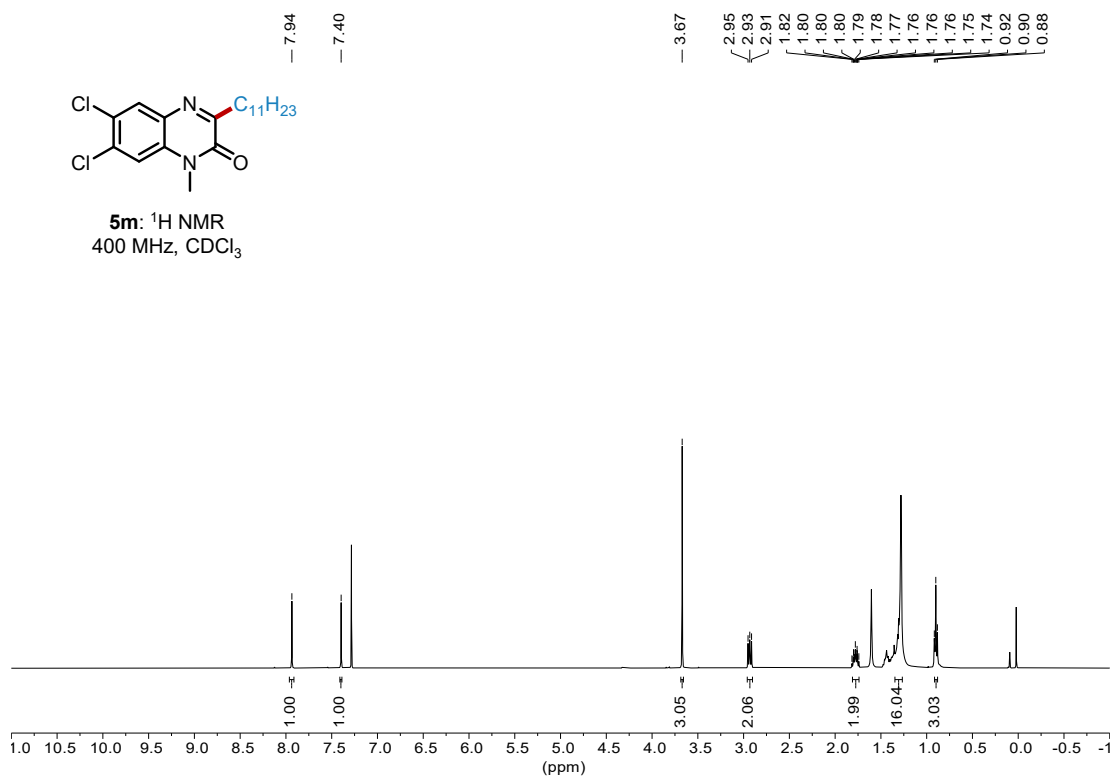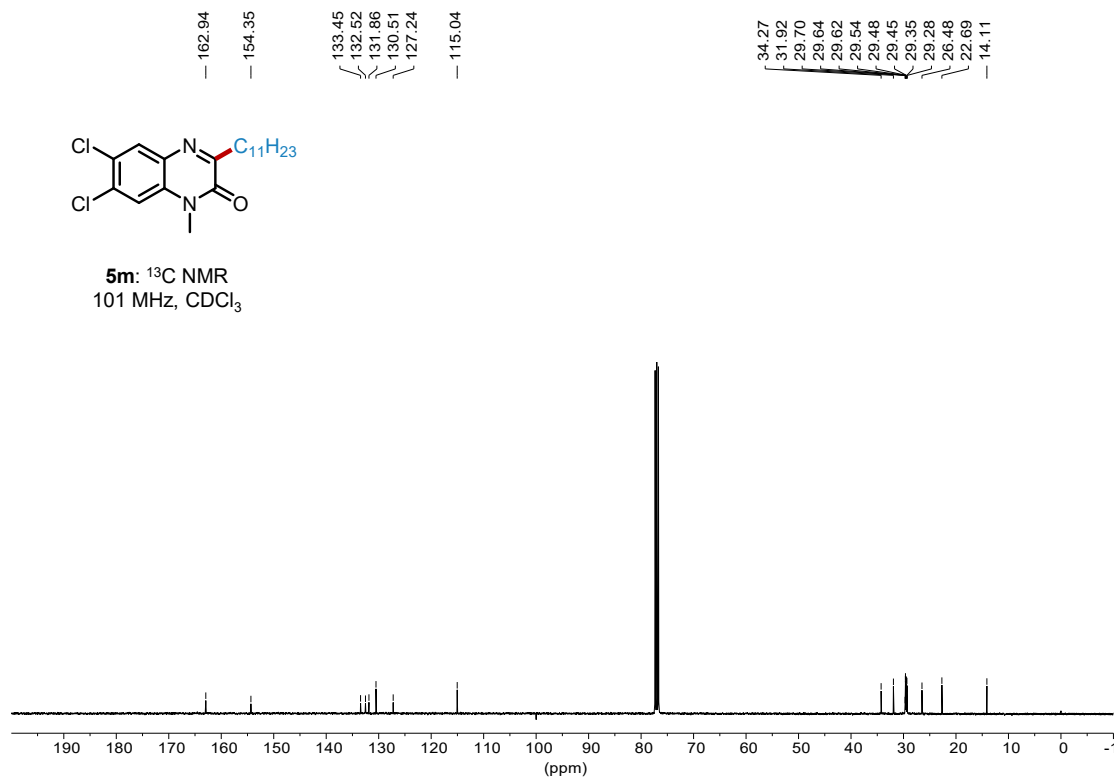

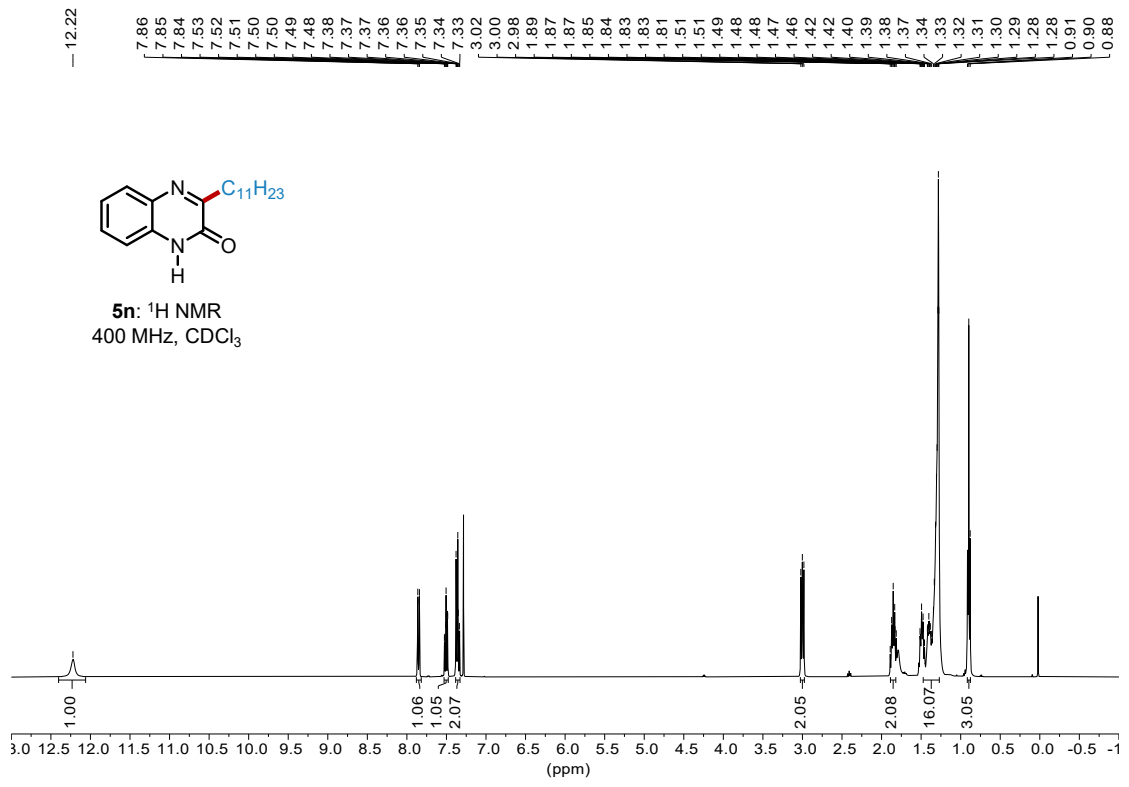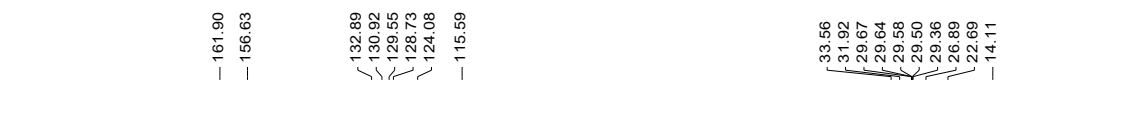



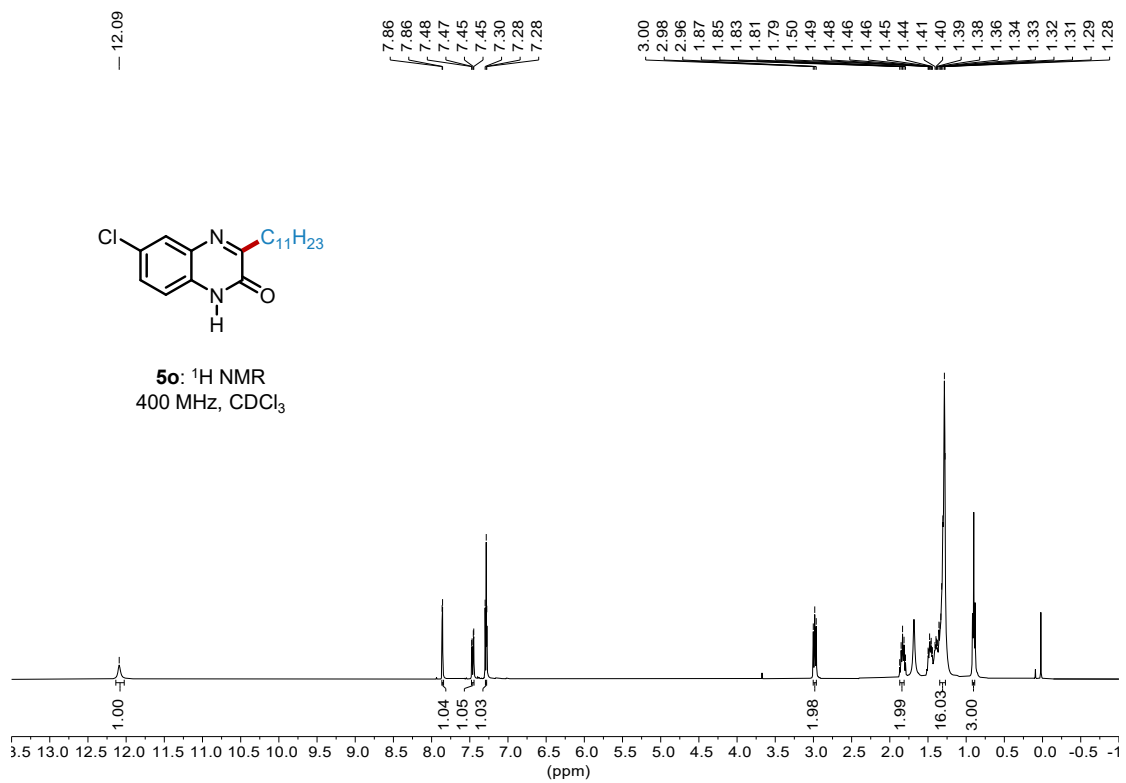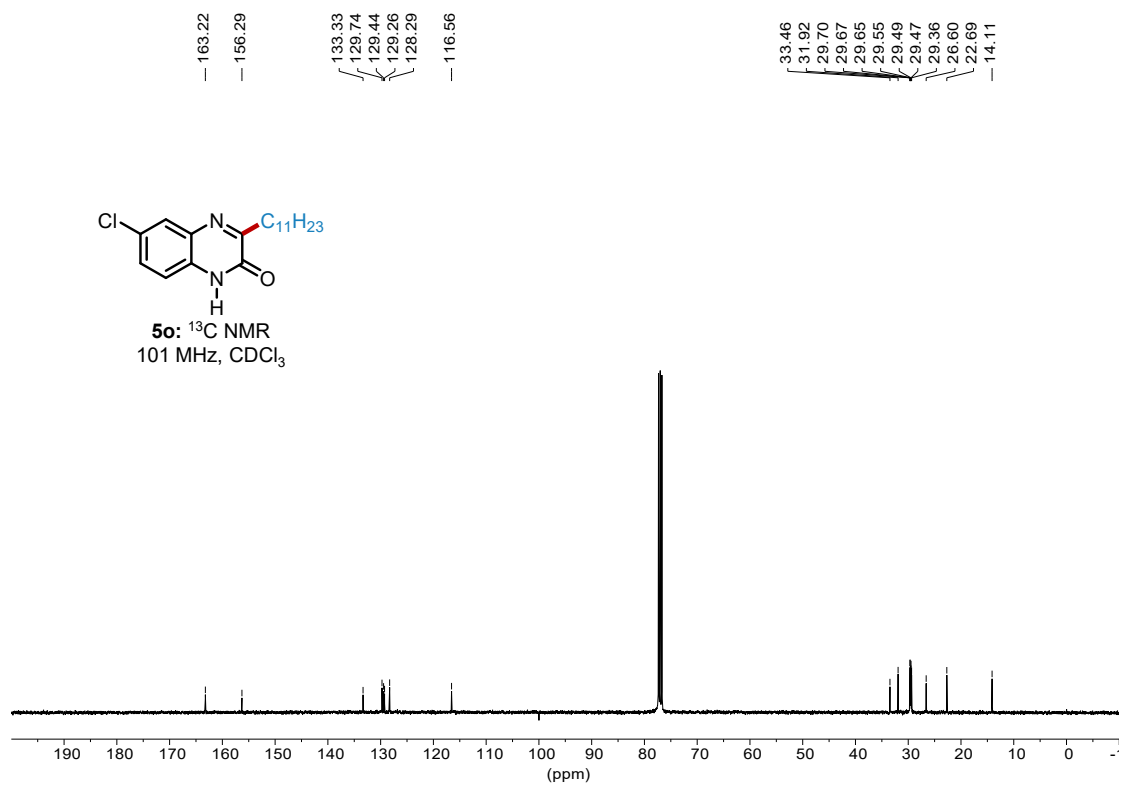

7.86  
7.86  
7.84  
7.84  
7.60  
7.60  
7.58  
7.58  
7.56  
7.56  
7.40  
7.40  
7.38  
7.36  
7.36  
7.35  
7.35  
7.33

3.73  
3.25  
3.23  
3.22  
3.22  
3.21  
2.78  
2.77  
2.76  
2.76  
2.75  
2.74  
2.74  
2.73  
2.72  
2.71  
2.70  
2.70  
2.68  
2.67  
2.66

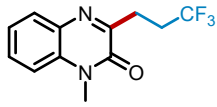

**5p:**  $^1\text{H}$  NMR  
400 MHz,  $\text{CDCl}_3$

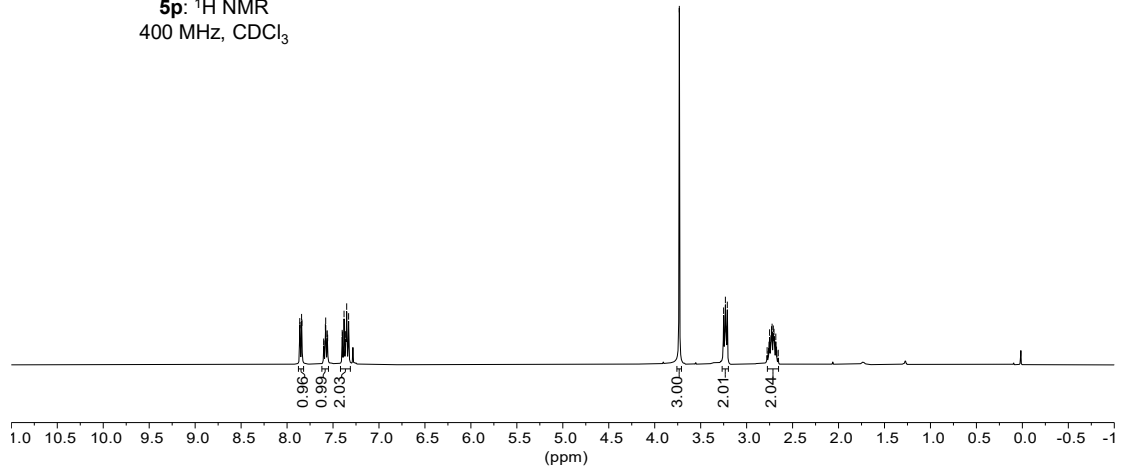

157.25  
154.57  
133.11  
132.45  
131.35  
130.12  
129.87  
128.60  
125.86  
123.72  
123.11  
113.66

30.62  
30.33  
30.03  
29.74  
29.04  
26.61  
26.58  
26.56  
26.53

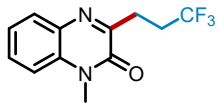

**5p:**  $^{13}\text{C}$  NMR  
101 MHz,  $\text{CDCl}_3$

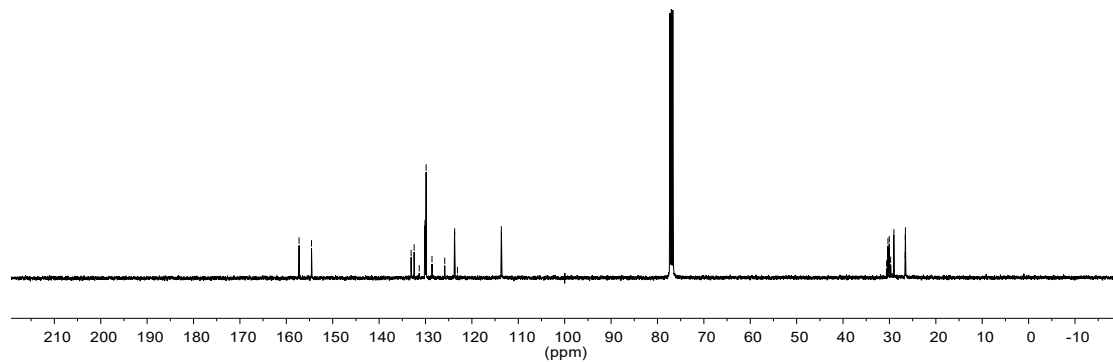

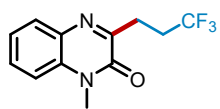

**5p:**  $^{19}\text{F}$  NMR  
376 MHz,  $\text{CDCl}_3$

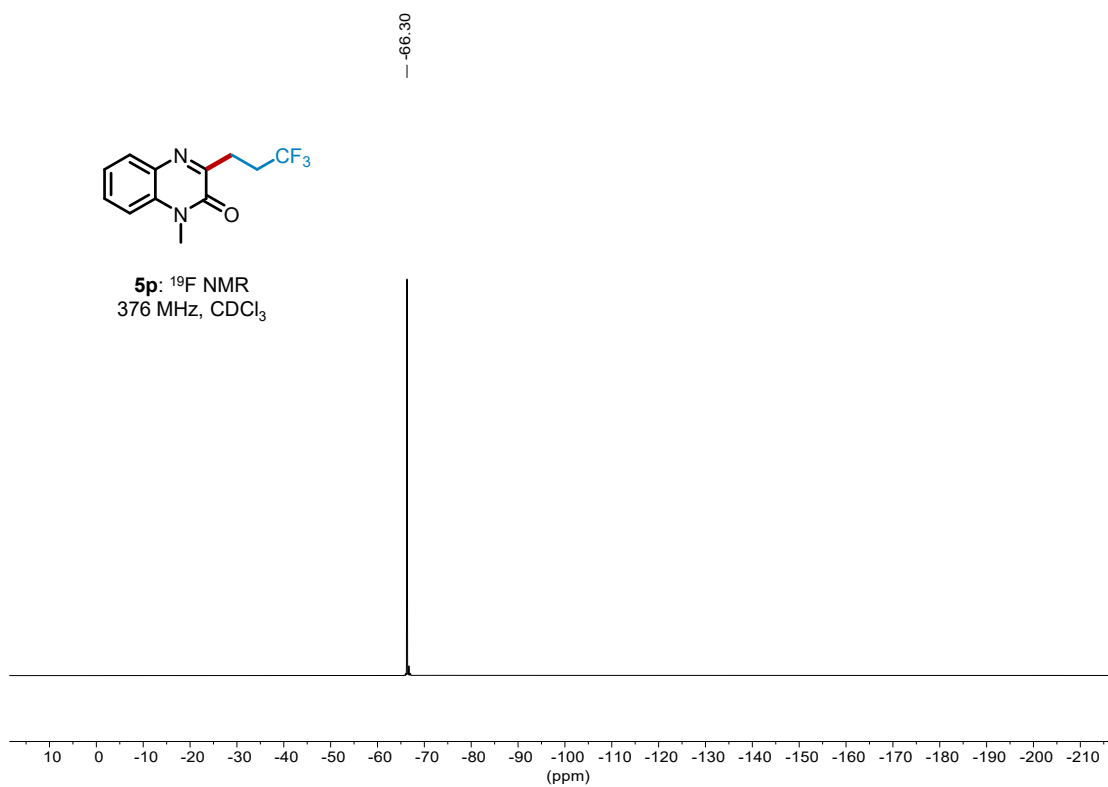

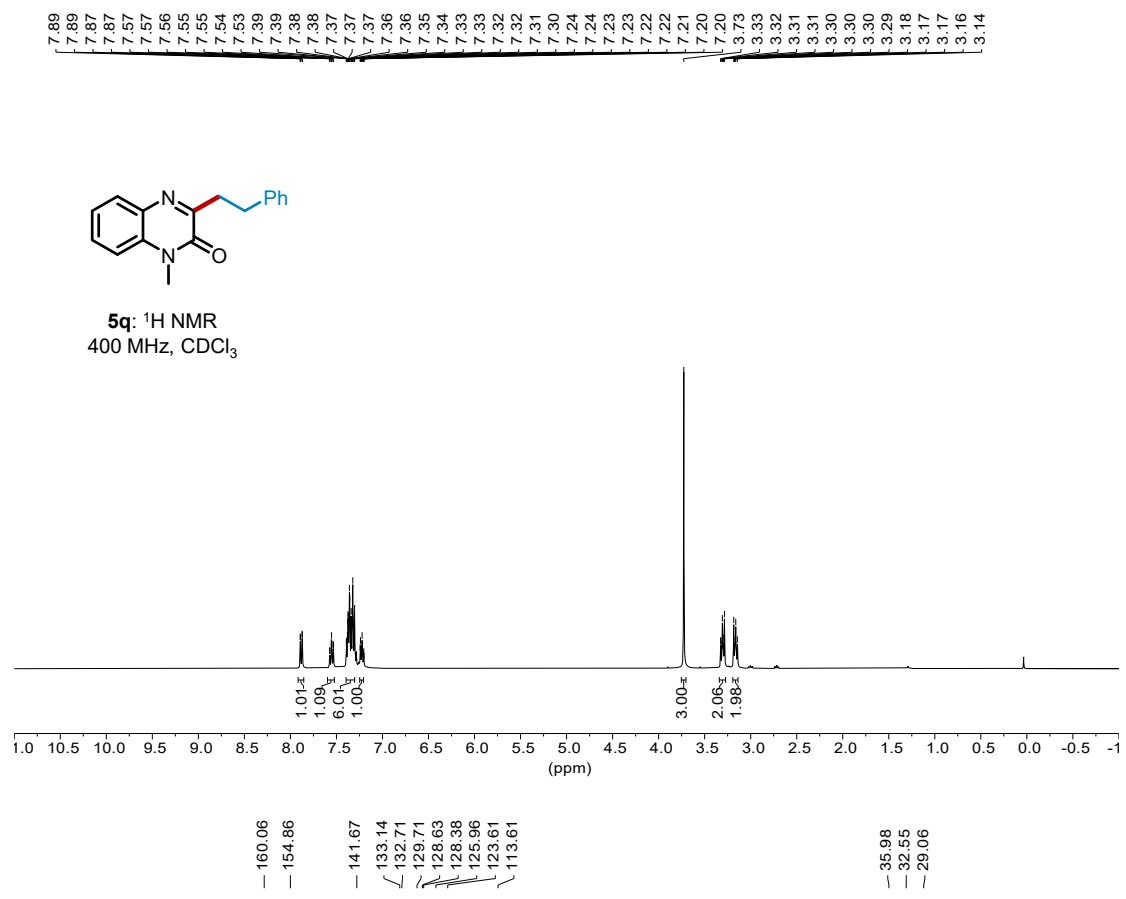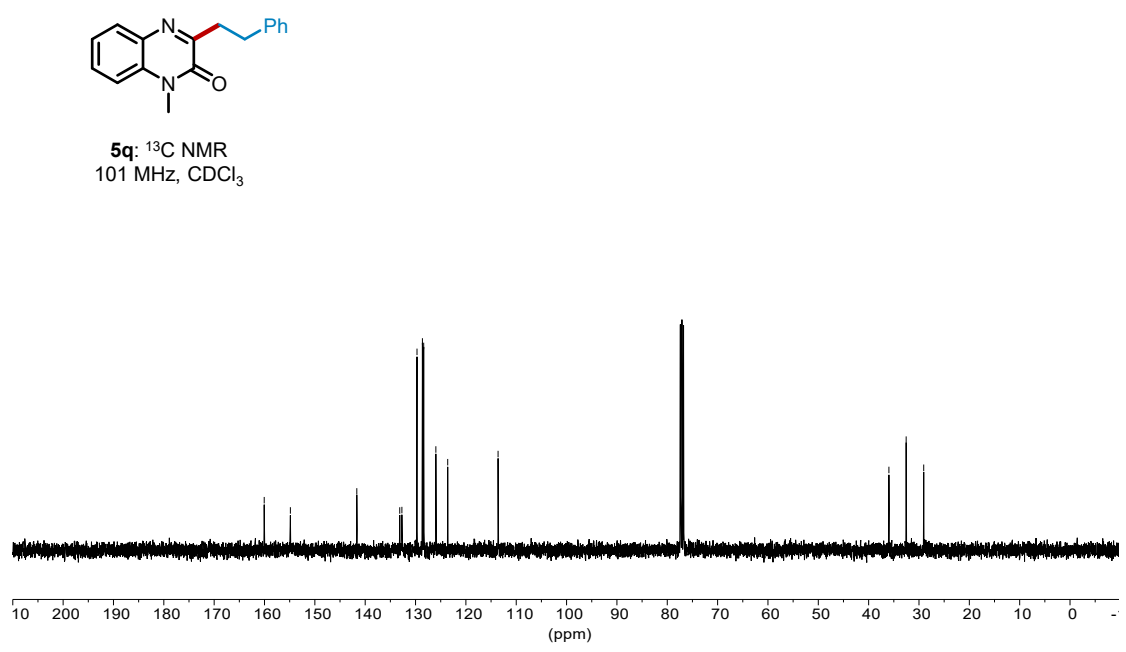

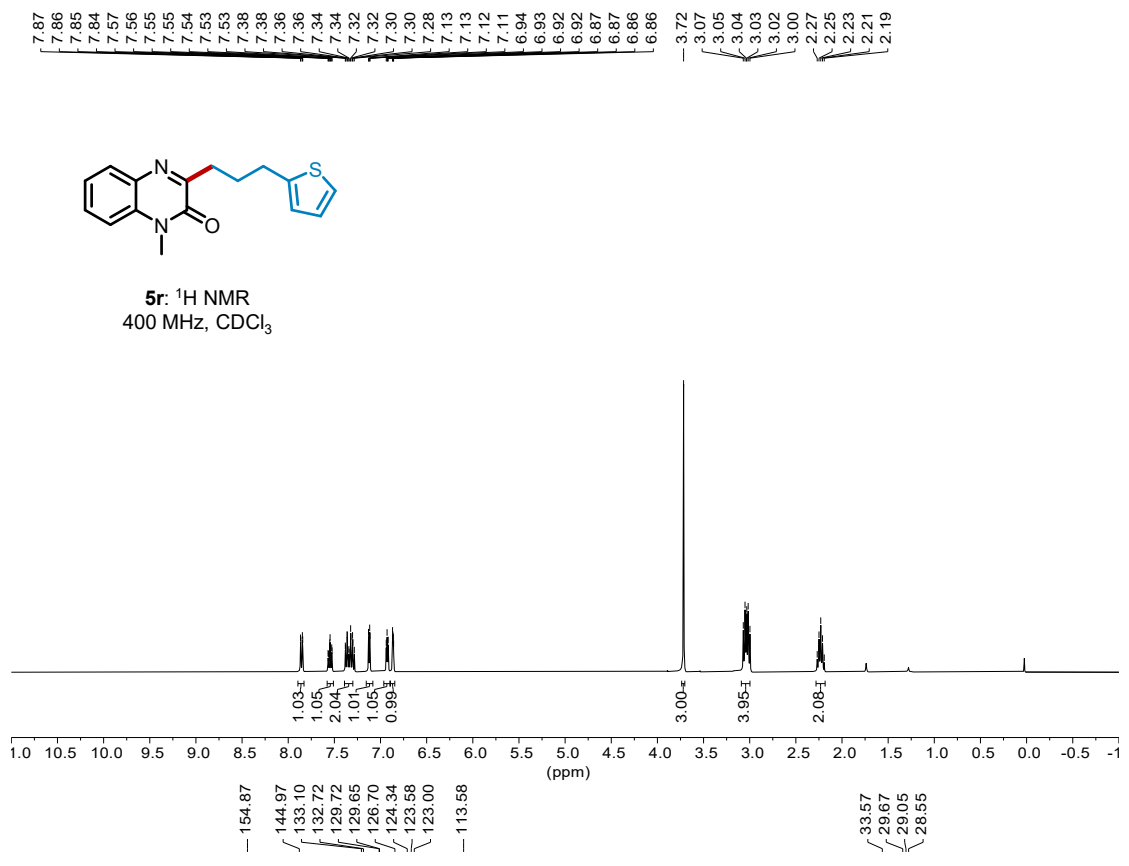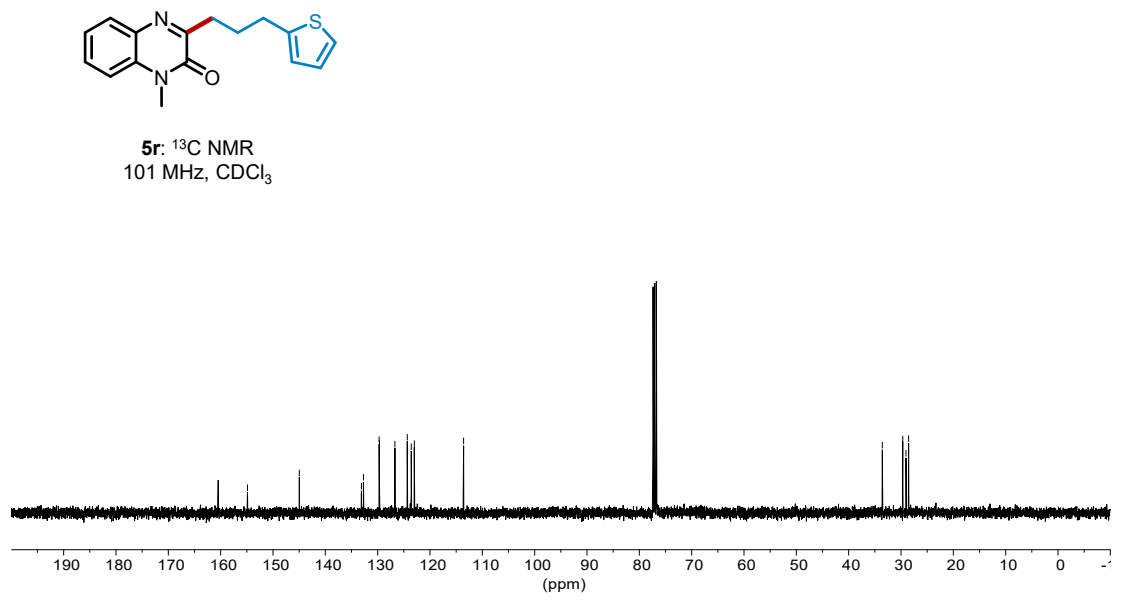

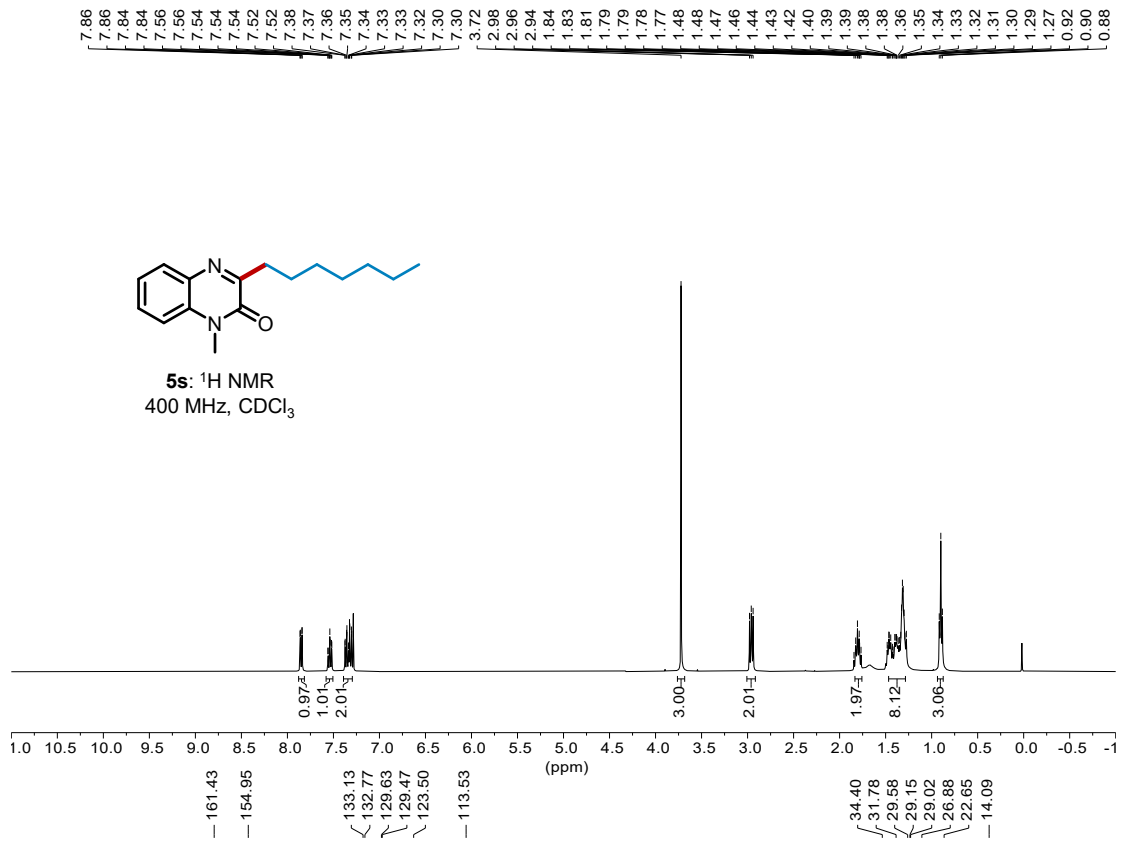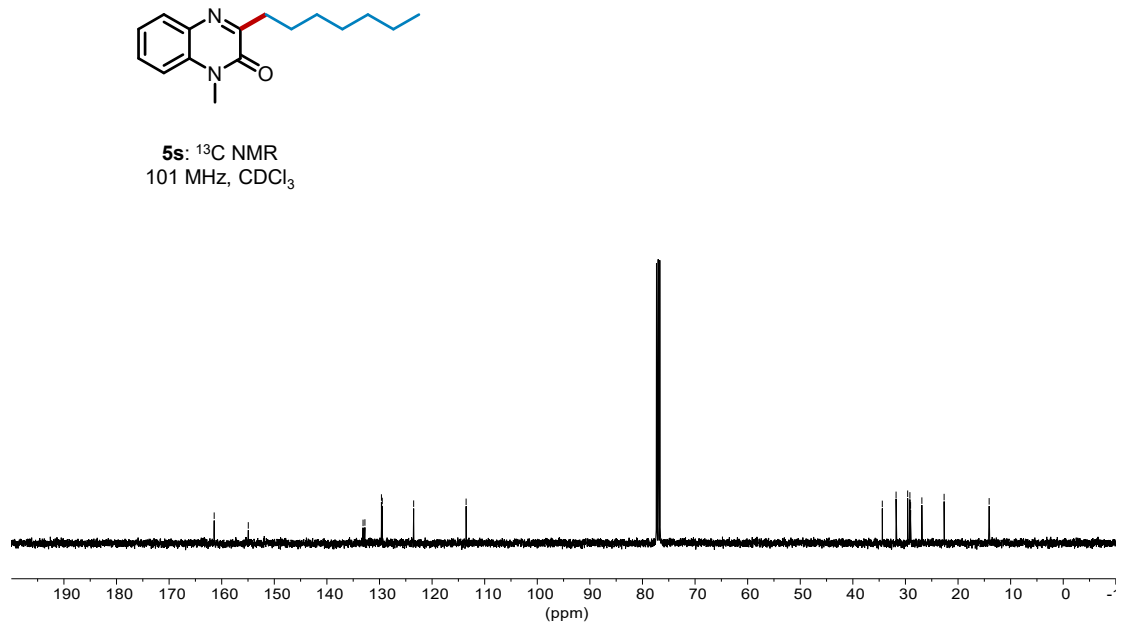

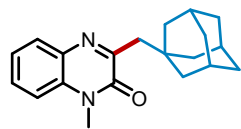

**5t:**  $^1\text{H}$  NMR  
400 MHz,  $\text{CDCl}_3$

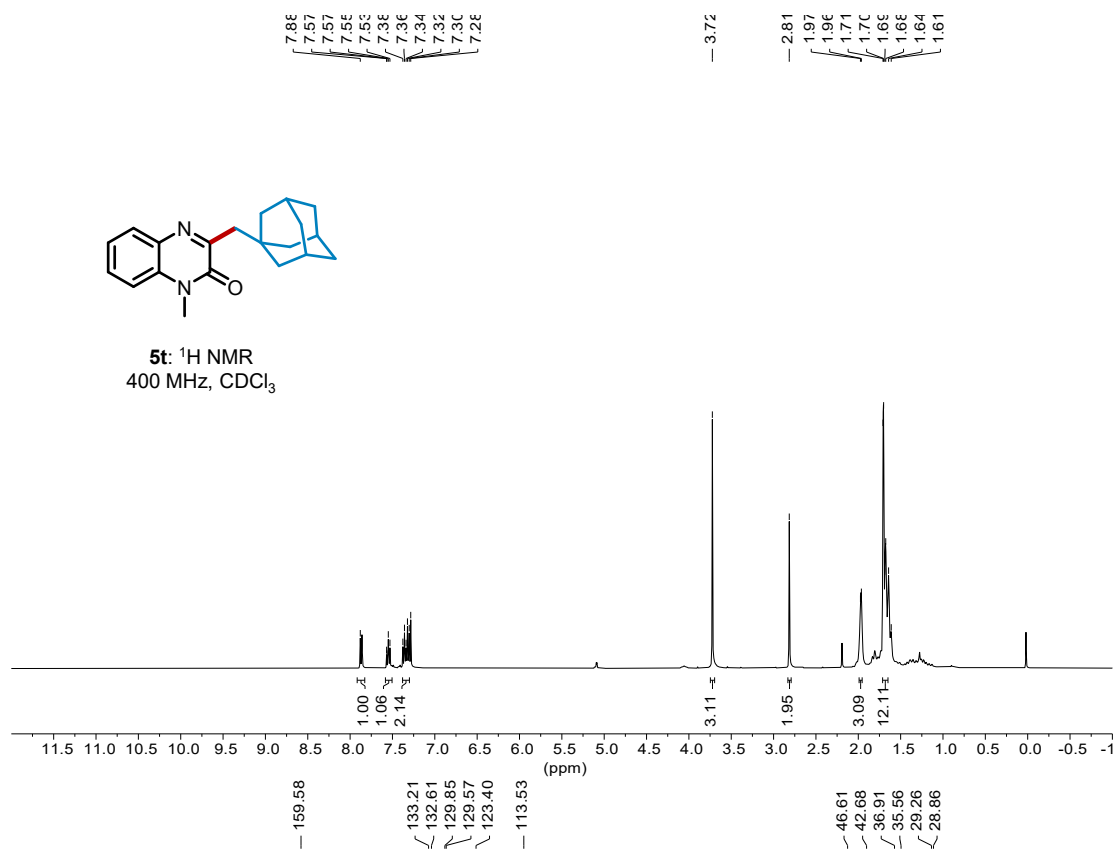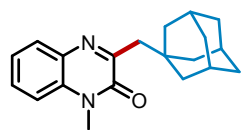

**5t:**  $^{13}\text{C}$  NMR  
101 MHz,  $\text{CDCl}_3$

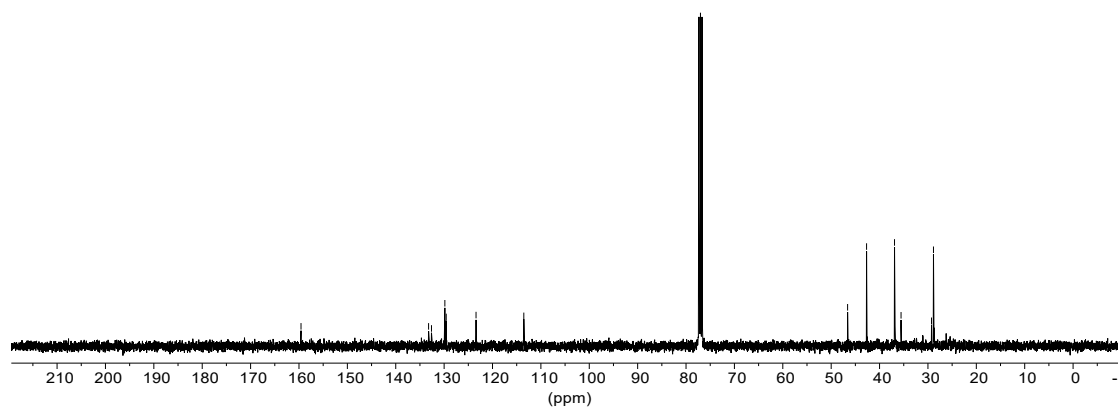

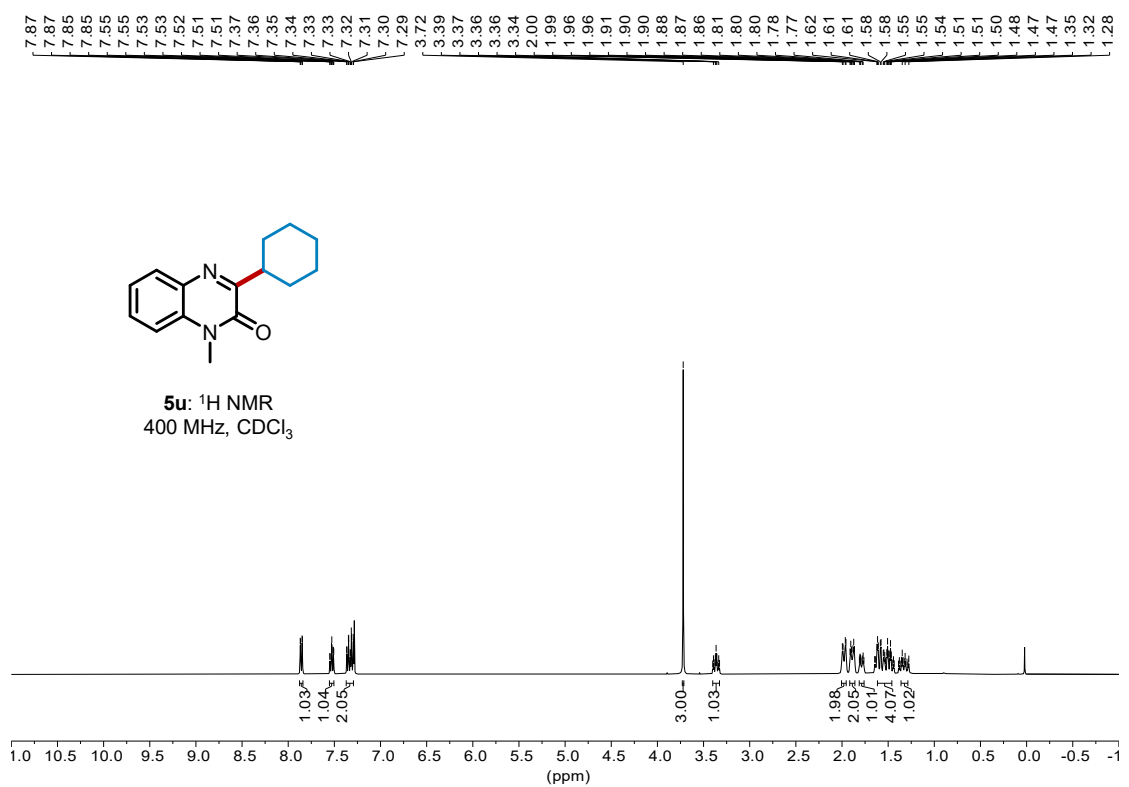

- 164.30
- 154.56
- 132.92
- 129.79
- 129.37
- 123.38
- 113.45
- 40.79
- 30.53
- 29.05
- 26.32
- 26.17

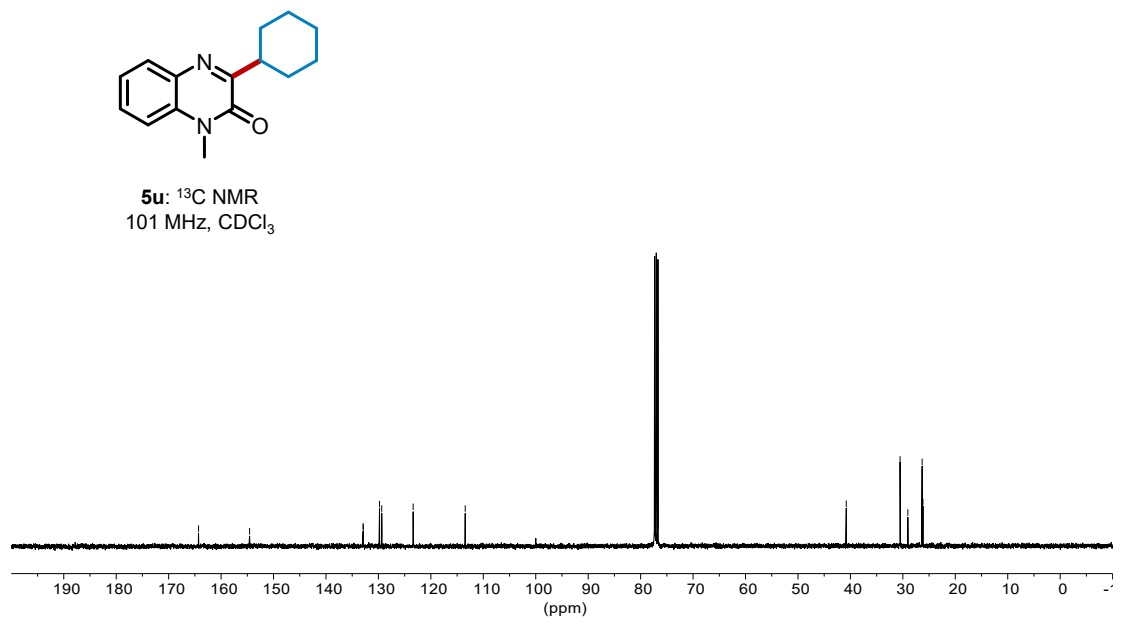



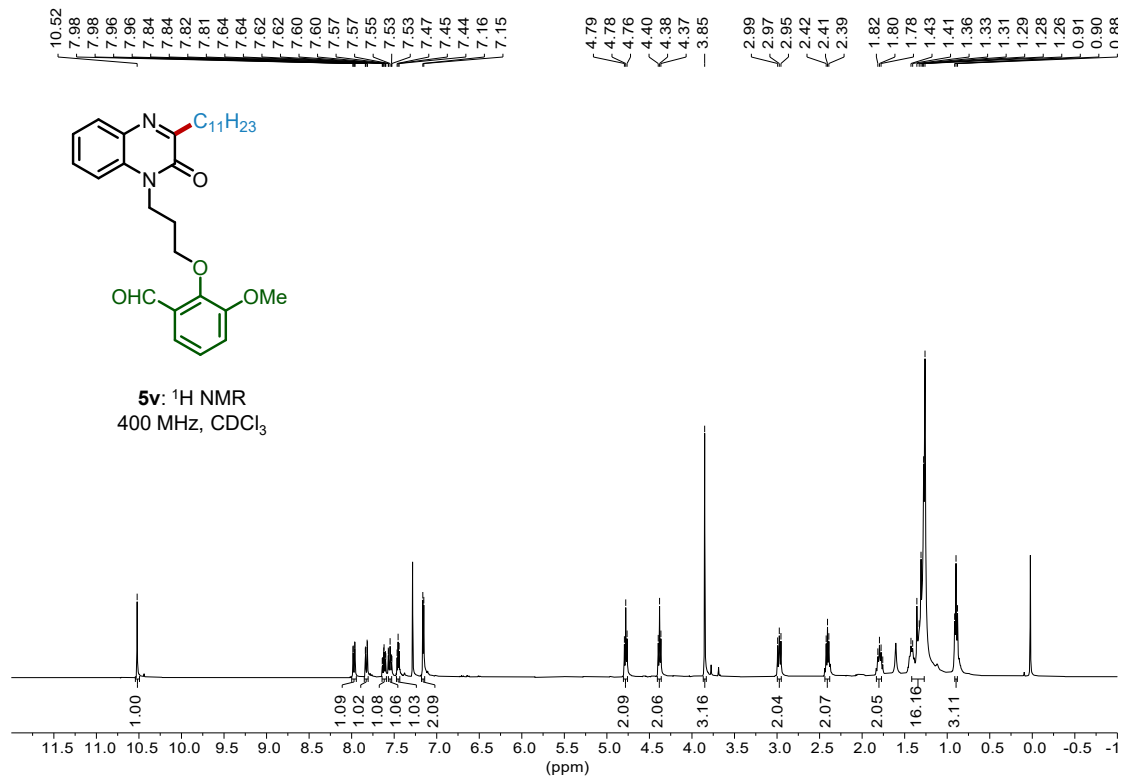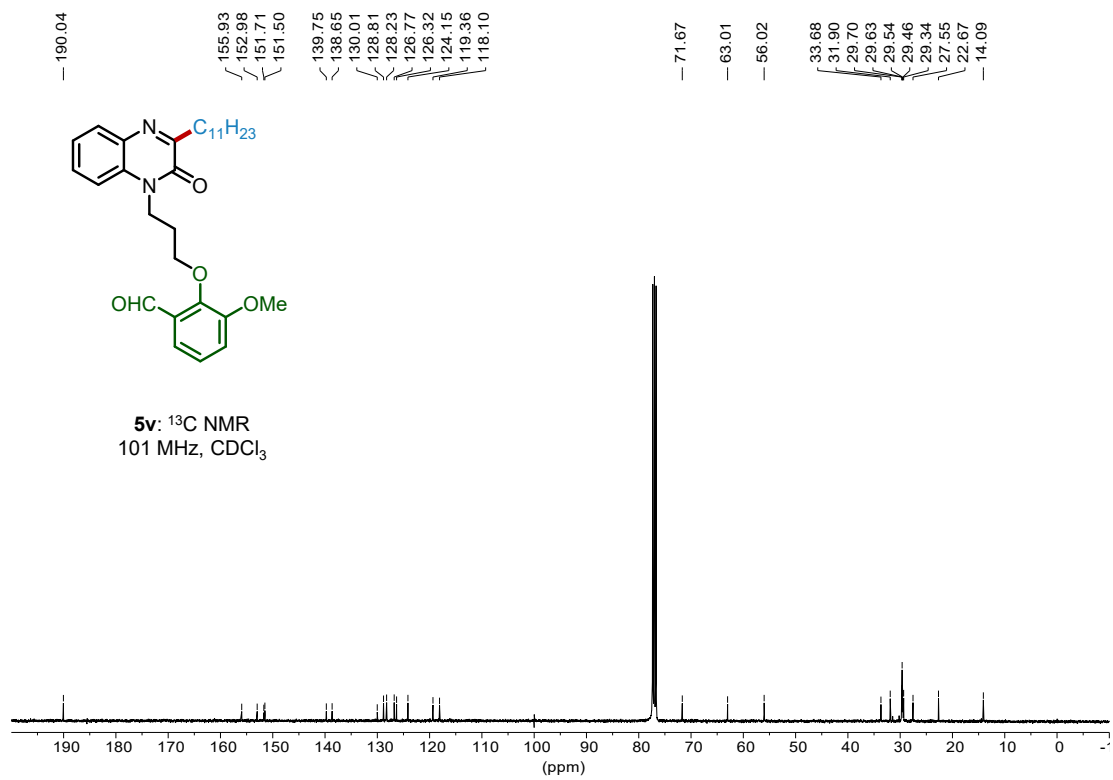

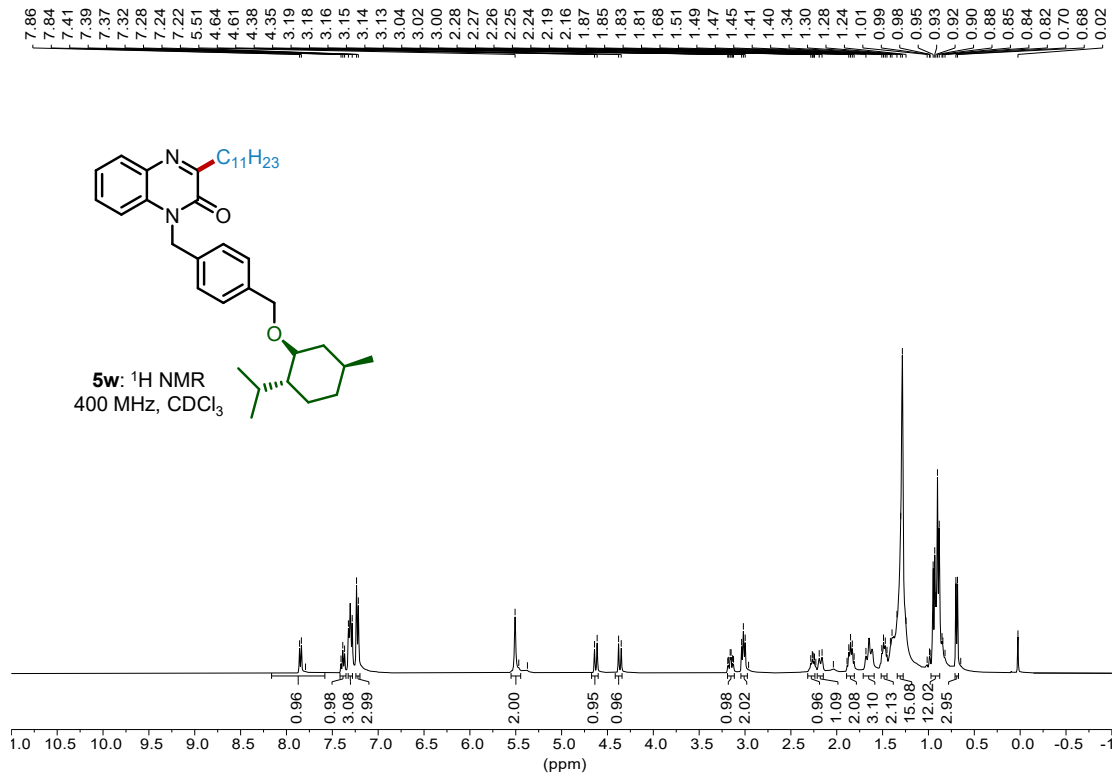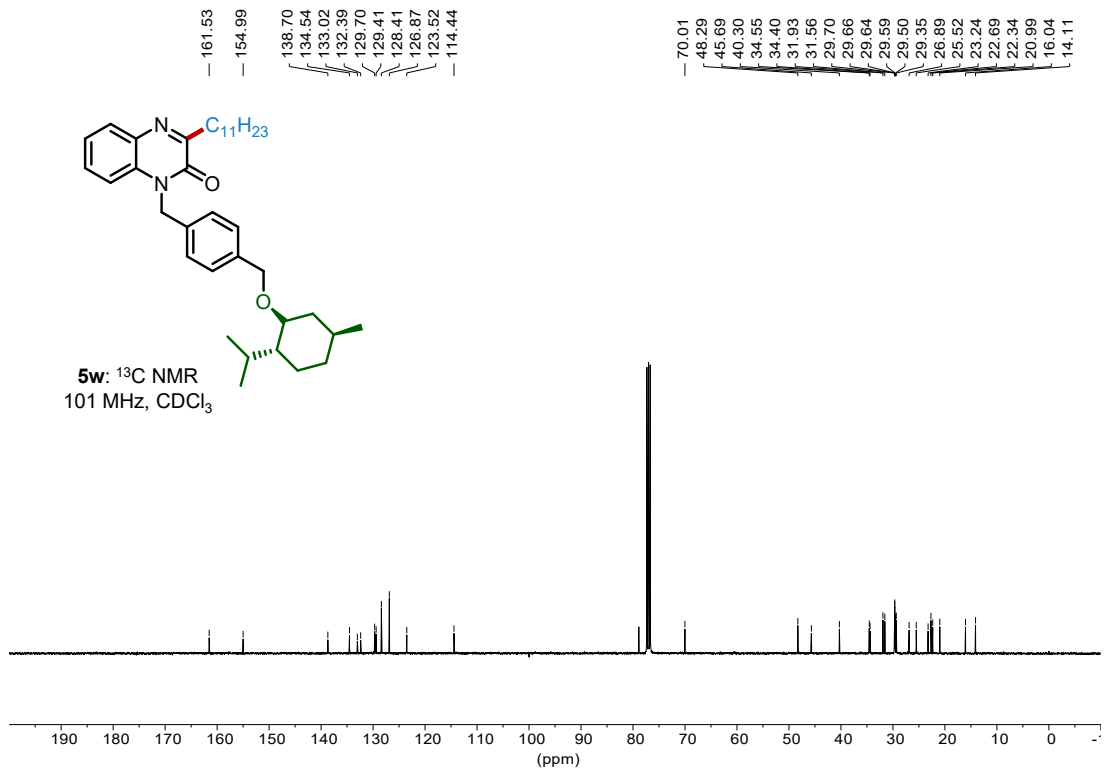

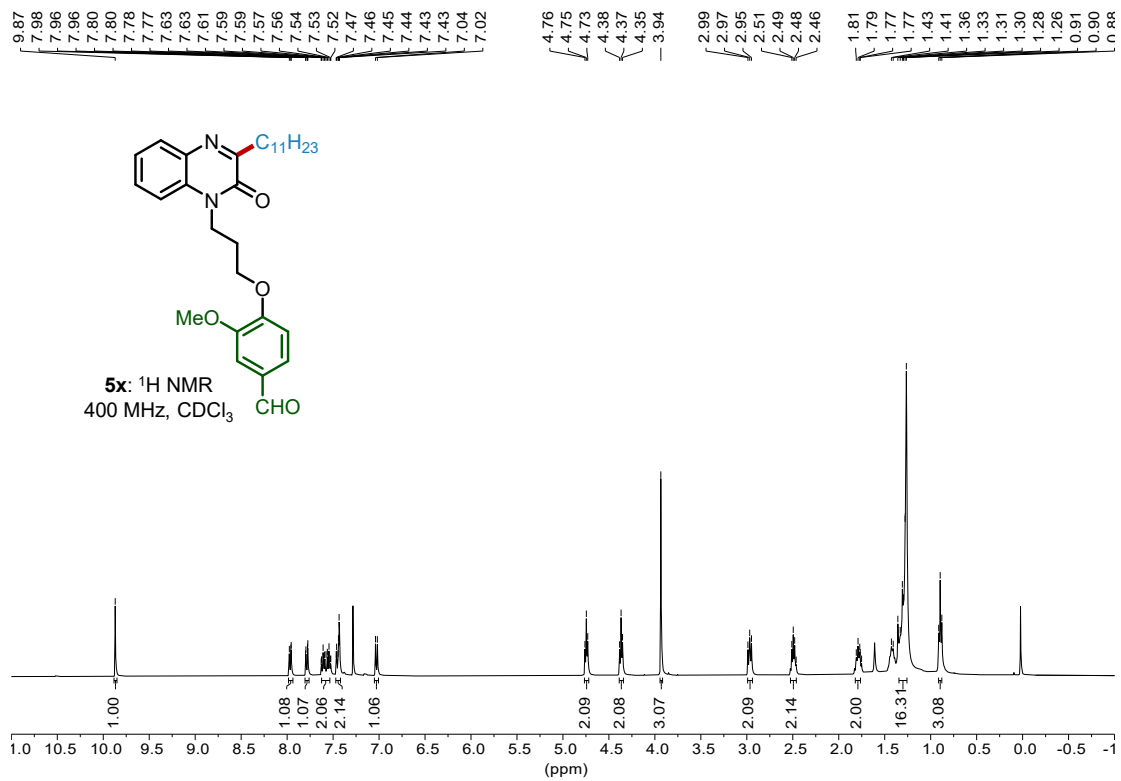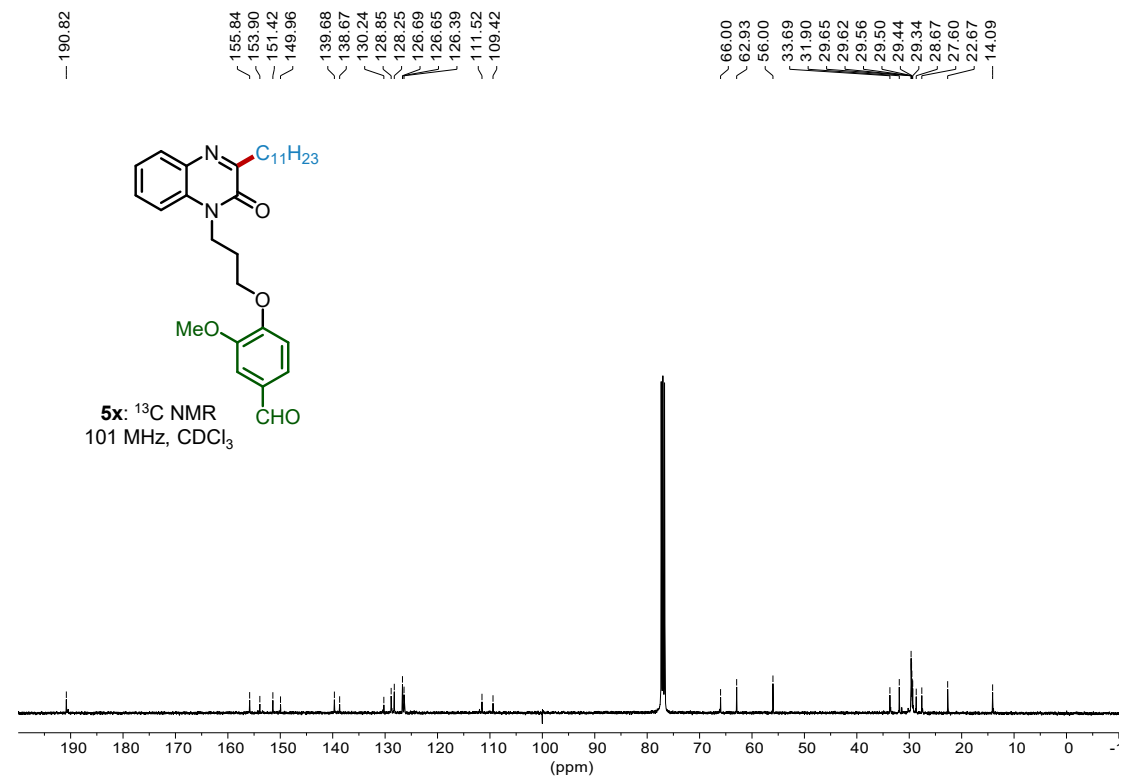

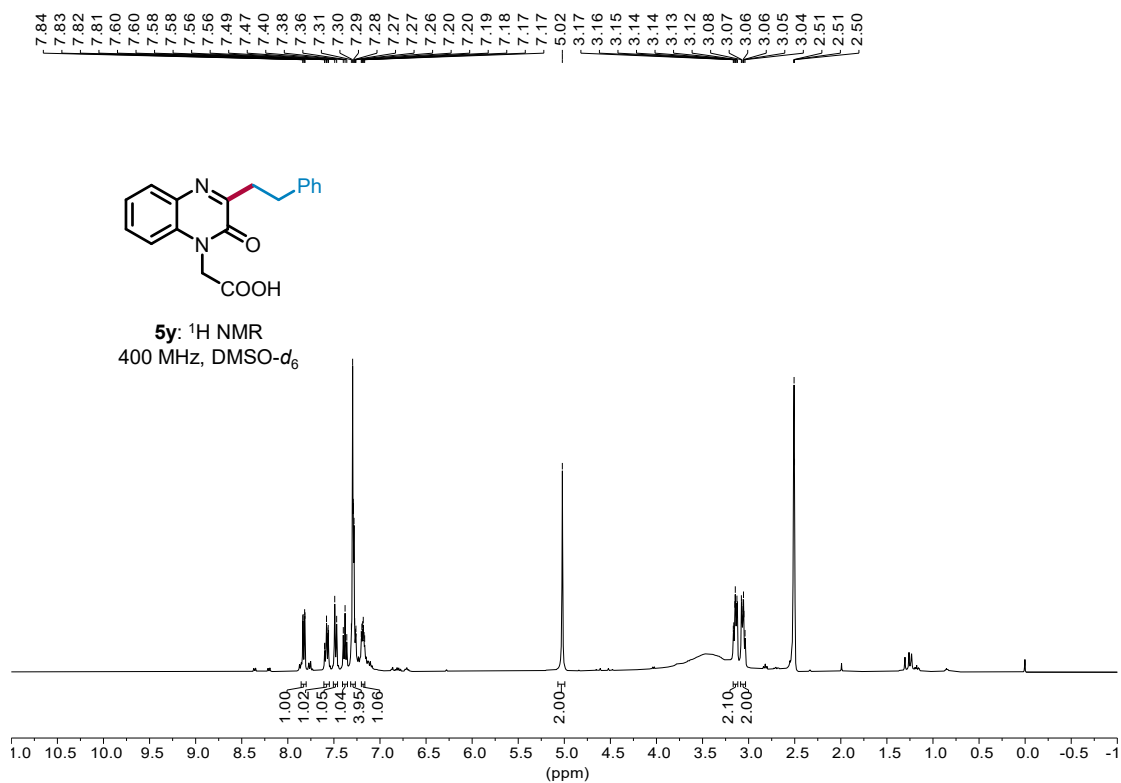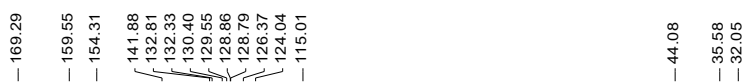

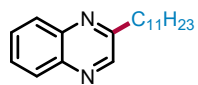

7a: <sup>1</sup>H NMR  
400 MHz, CDCl<sub>3</sub>

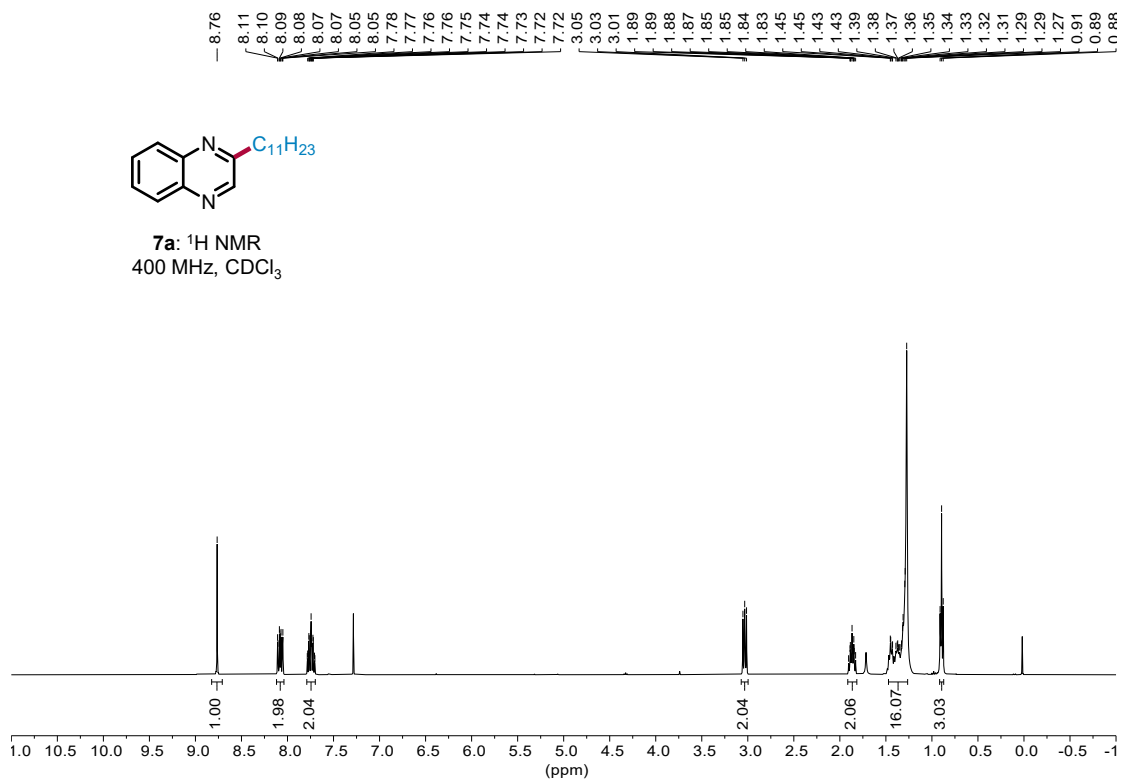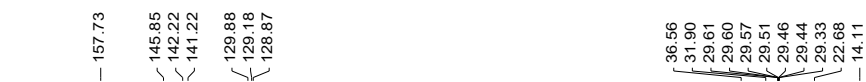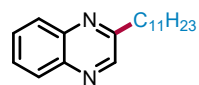

7a: <sup>13</sup>C NMR  
101 MHz, CDCl<sub>3</sub>

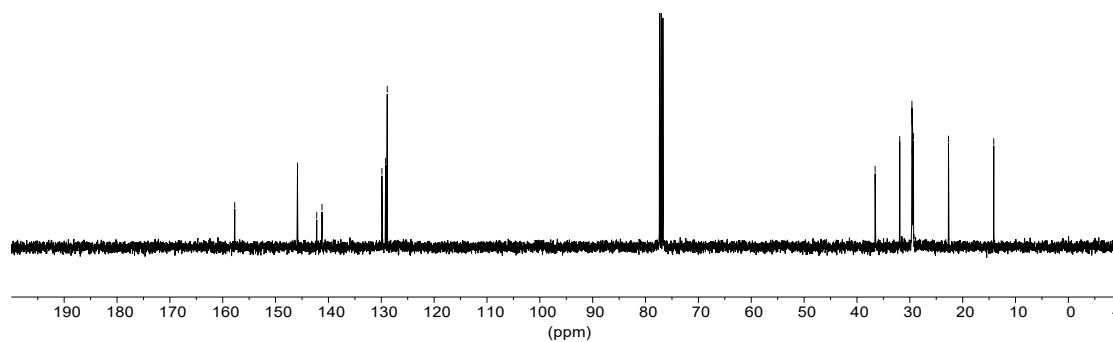

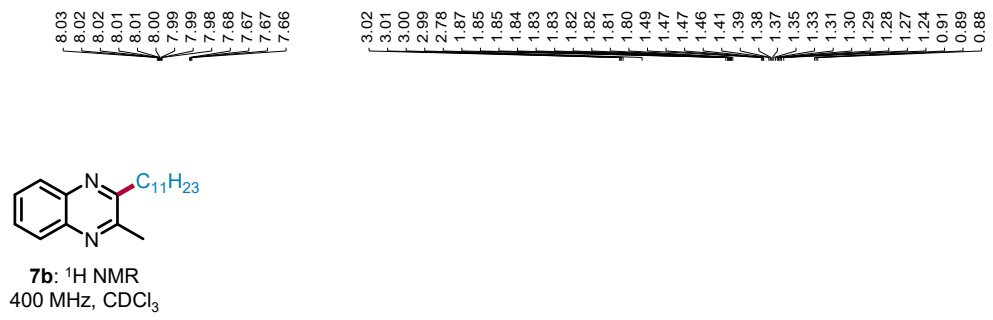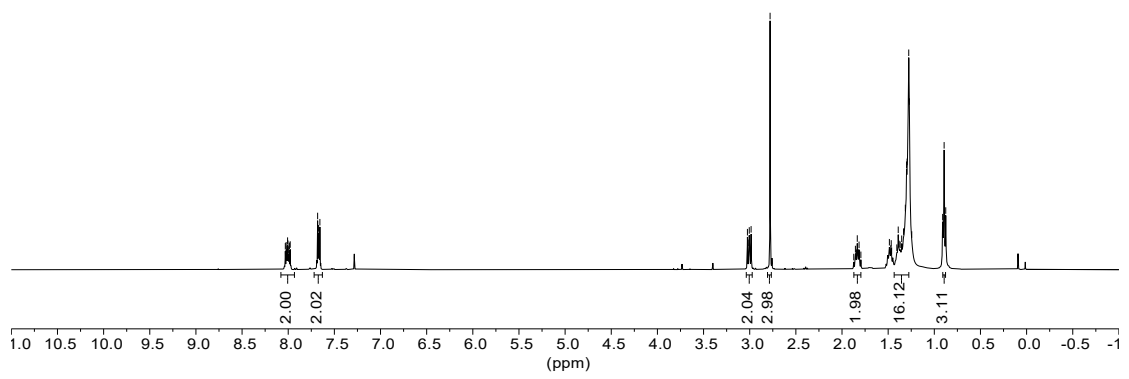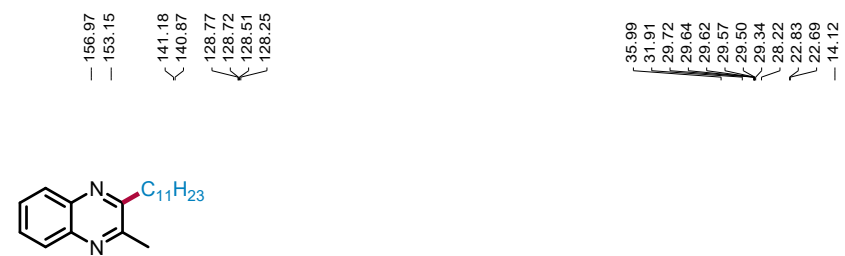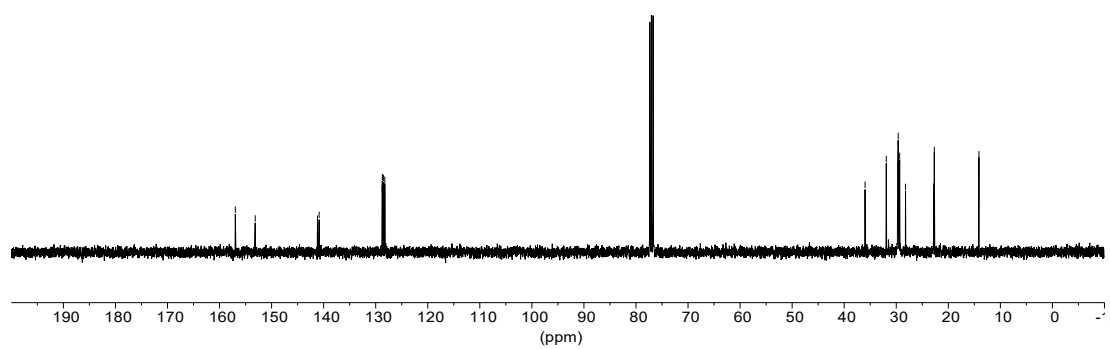

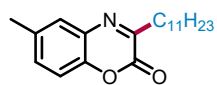

**7c:**  $^1\text{H}$  NMR  
400 MHz,  $\text{CDCl}_3$

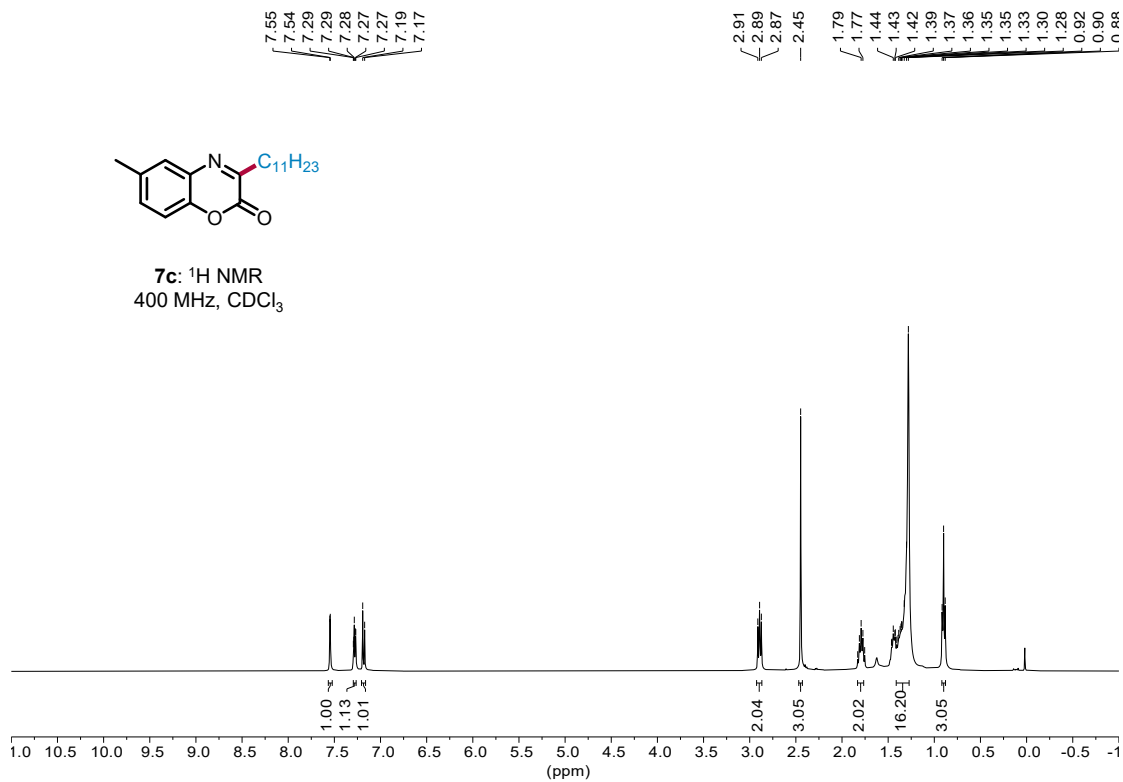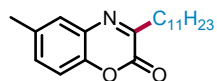

**7c:**  $^{13}\text{C}$  NMR  
101 MHz,  $\text{CDCl}_3$

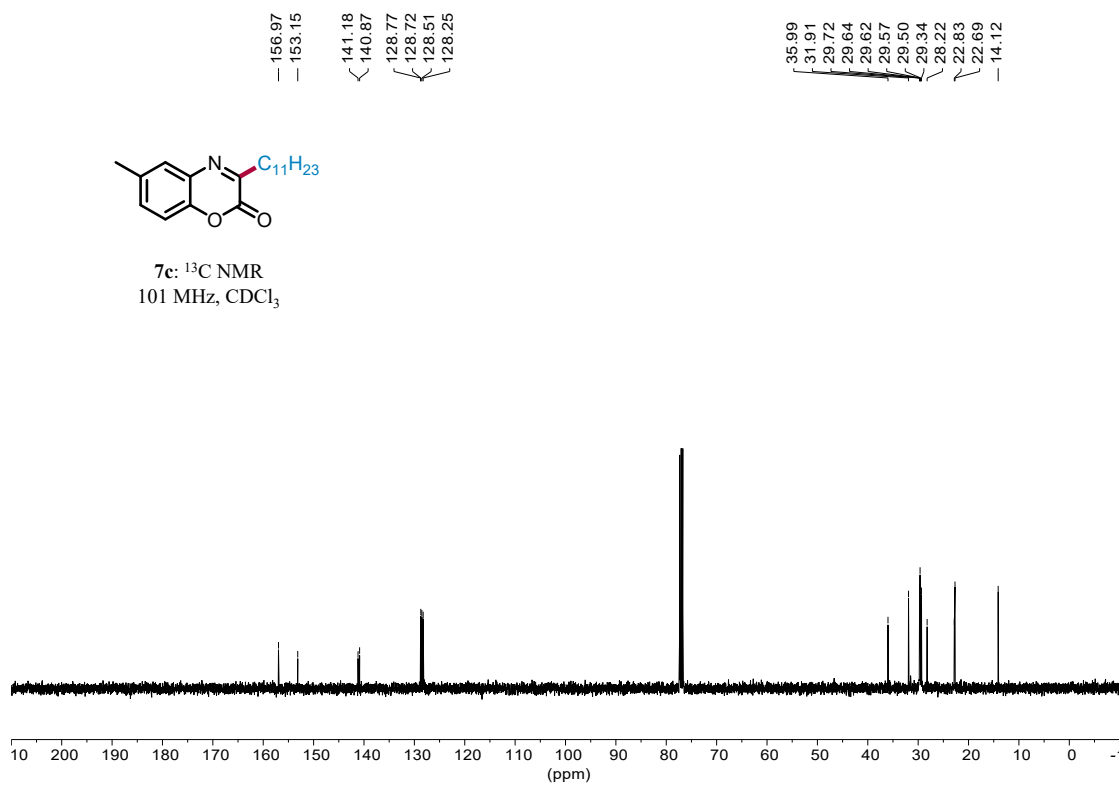

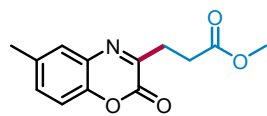

**7d:**  $^1\text{H}$  NMR  
400 MHz,  $\text{CDCl}_3$

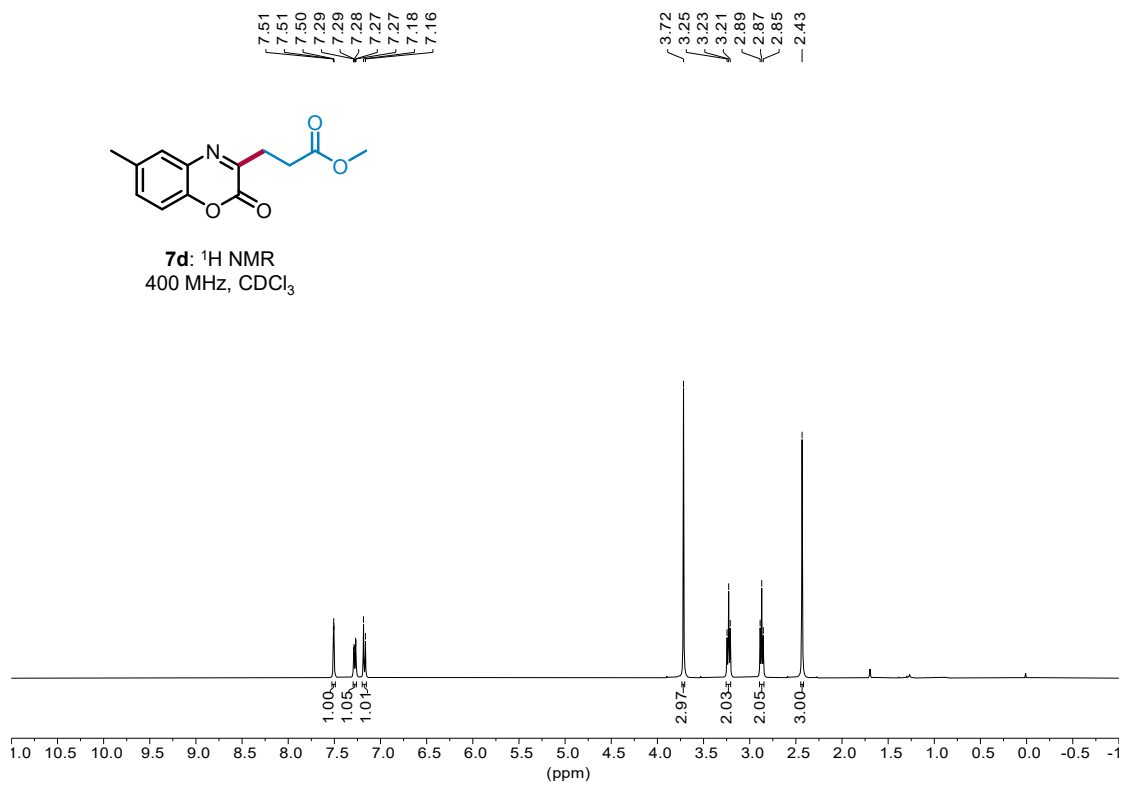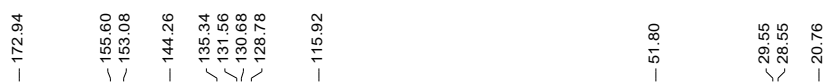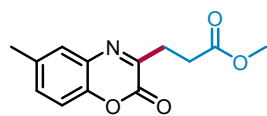

**7d:**  $^{13}\text{C}$  NMR  
101 MHz,  $\text{CDCl}_3$

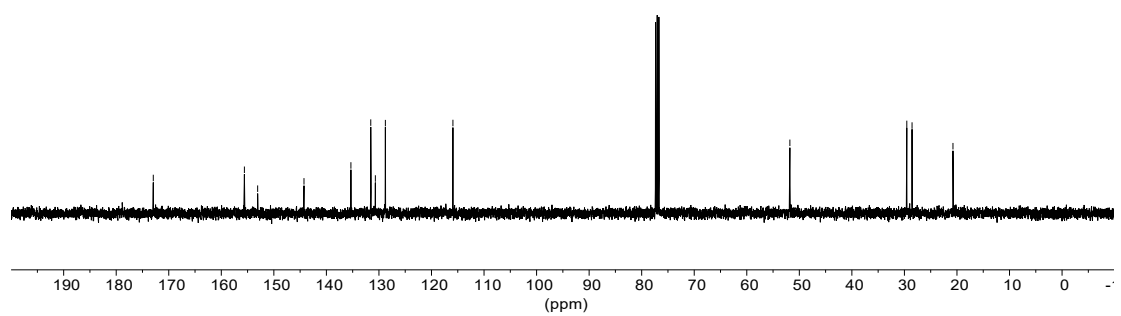



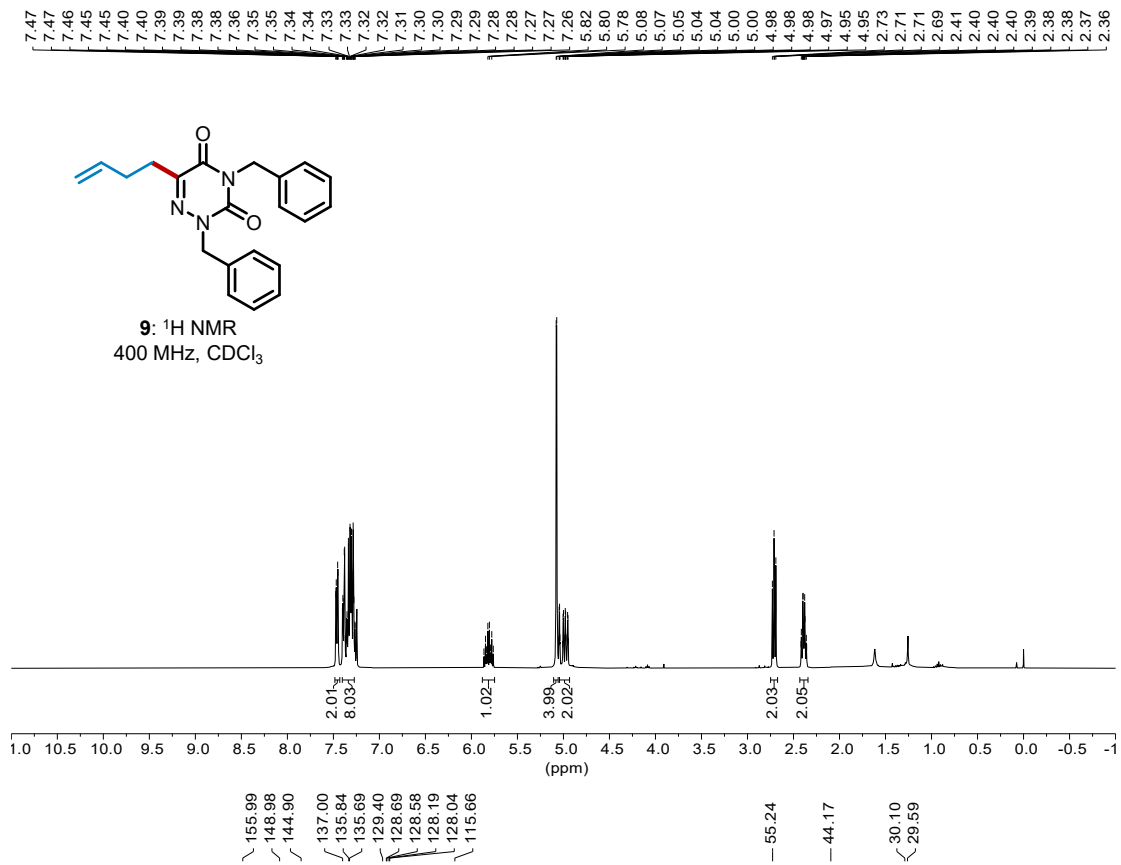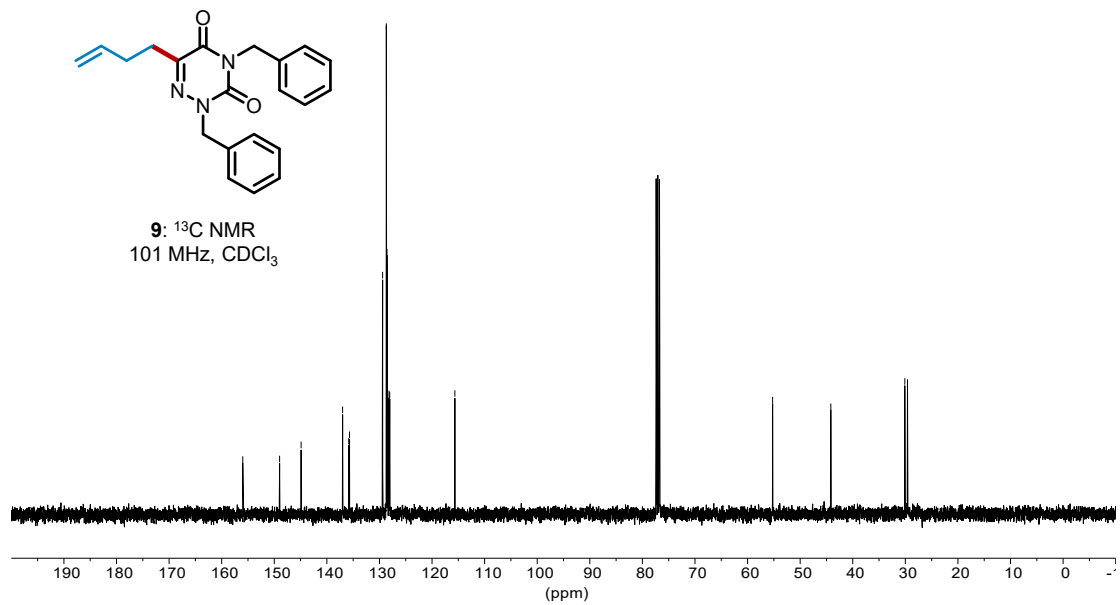

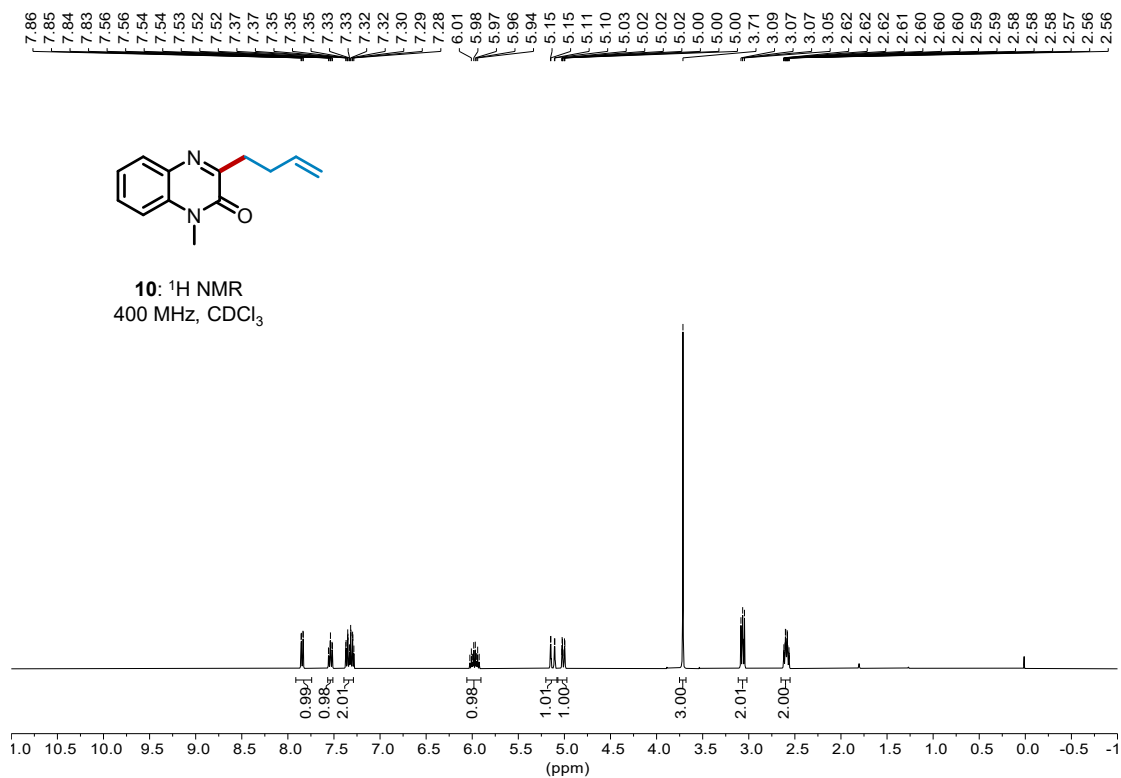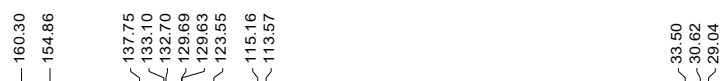

1. P. Ghosh, N. Y. Kwon, S. Kim, S. Han, S. H. Lee, W. An, N. K. Mishra, S. B. Han and I. S. Kim, *Angew. Chem. Int. Ed.*, 2021, **60**, 191-196.
2. X.-K. He, J. Lu, A.-J. Zhang, Q.-Q. Zhang, G.-Y. Xu and J. Xuan, *Org. Lett.*, 2020, **22**, 5984-5989.
3. (a) S. Rajamanickam, C. Sah, B. A. Mir, S. Ghosh, G. Sethi, V. Yadav, S. Venkataramani and B. K. Patel, *J. Org. Chem.*, 2020, **85**, 2118-2141; (b) C. Ye, Y. Li and H. Bao, *Adv. Synth. Catal.*, 2017.

4. Y. Ma, S. R. Pendlebury, A. Reynal, F. Le Formal and J. R. Durrant, *Chem. Sci.*, 2014, **5**, 2964-2973.
5. K. Niu, L. Song, Y. Hao, Y. Liu and Q. Wang, *Chem. Commun.*, 2020, **56**, 11673-11676.
6. P. Ghosh, Y. Byun, N. Y. Kwon, J. Y. Kang, N. K. Mishra, J. S. Park and I. S. Kim, *Cell Reports Physical Science*, 2022, **3**, 100819.
7. Z. Yan, B. Sun, X. Zhang, X. Zhuang, J. Yang, W. Su and C. Jin, *Chem. Asian J.*, 2019, **14**, 3344-3349.
8. S. Hussain, S. Parveen, X. Hao, S. Zhang, W. Wang, X. Qin, Y. Yang, X. Chen, S. Zhu, C. Zhu and B. Ma, *Eur. J. Med. Chem.*, 2014, **80**, 383-392.
9. K. Hachama, M. Khodja, S. Moulay, H. Boutoumi, L. Hennig and D. Sicker, *Journal of Heterocyclic Chemistry*, 2013, **50**, 413-416.
10. S. Singh, N. Dagar and S. R. Roy, *Chem. Commun.*, 2022, **58**, 3831-3834.
